# Supplementary material
Source: publisher figshare collection journal article supplement (https://gsajournals.figshare.com/ndownloader/files/23204513)
Supplement: Supplementary file 1 [file 23204513]

## Sheet: Table S6
Table S6. Adjusted means per population for all the phenotypic traits used in this study.
A detailed description of the traits is available in Supplementary File S1
NA: missing data
Pop. entry number (as per supplementary table 1)	ADF_04_me17	ADF_10_me17	ADF_avg	ADL_04_me17	ADL_10_me17	ADL_avg	AHD_avg	AHD_me16	AHD_me17	AHD_lu16	AHD_lu17	AHD_po16	AHD_po17	δ13C_lu16	DES_po15	DHE_07_lu16	DHE_01_lu17	DHE_04_lu17	DIS_avg	DIS_me16	DIS_me17	DIS_lu15	DIS_lu16	DIS_lu17	DIS_po15	DIS_po17	DNDF_04_me17	DNDF_10_me17	DNDF_avg	DRB_lu1516	DRO_avg	DRO_lu16	DRO_po16	DST_avg	DST_lu17	resDST_lu17	DST_po17	DVG_04_lu17	GRH_avg	HEA_avg	HEA_lu16	HEA_lu17	HEA_po16	HEA_po17	HFY_avg	HFY_lu15	HFY_po15	HST_lu17	LMW_avg
1	16.3016	22.3004	19.301	0.419488	1.32623	16.3016	1.62684	1.04445	1.82841	2.43215	1.03264	2.5003	1.25436	-30.5045	25.1477	4.73182	6.22531	3.73698	3.56089	1.60973	2.10088	4.10548	1.01299	4.56586	2.53188	3.7354	82.3769	73.1185	77.7477	3.2543	6.87271	6.63808	6.9932	7.33452	6.63439	-0.24863	8.67058	6.22531	4.91635	805.791	862.132	840.02	657.27	681.989	1.35443	0.9588	1.75908	46.5246	4.20461
10	15.5016	21.6671	18.5844	0.416154	1.14957	15.5016	1.7727	1.21111	2.16174	2.43215	1.03264	2.5986	1.64287	-30.769	29.9778	4.73182	6.89198	4.57031	3.28774	2.27639	2.10088	3.60548	1.01299	4.56586	1.88478	3.14578	81.4436	75.6519	78.5477	2.8543	6.80108	6.80475	6.69128	5.57636	3.96772	-1.32118	7.72421	6.89198	4.57018	942.354	1029.73	1051.05	759.383	746.237	1.09533	1.29213	0.894772	41.858	3.85618
100	17.3856	21.9565	19.671	0.291142	1.14615	17.3856	1.7148	1.53526	1.63335	1.98773	1.04815	2.54882	1.69189	-30.5325	24.4137	5.48251	4.78456	3.55682	3.62605	1.84028	2.42063	4.08997	1.01067	4.74626	1.84311	4.30571	80.7954	69.3902	75.0928	3.24143	7.01112	7.37082	6.5453	7.98929	7.63439	0.909624	8.88341	4.78456	3.84761	819.348	921.098	860.053	643.22	670.011	0.947395	1.01955	0.871488	51.7305	4.54756
103	15.8523	20.0565	17.9544	0.364475	0.966147	15.8523	1.89207	1.0778	2.63335	1.98773	1.04815	2.71549	2.69189	-30.7325	31.747	6.14917	5.1179	3.55682	3.10224	1.84028	2.42063	3.1733	1.01067	4.74626	0.843112	3.47238	80.7954	70.4569	75.6262	2.50809	6.84445	7.20415	6.37863	5.98929	3.96772	-0.529967	8.55008	5.1179	4.84761	1010.14	1041.73	1115.62	816.796	883.381	0.947395	1.01955	0.871488	35.7305	2.65867
108	16.0984	22.4531	19.2758	0.503812	1.39099	16.0984	2.30264	1.36844	2.70147	3.69755	0.953526	3.41911	2.91268	-30.371	23.7557	4.19207	5.20147	4.34075	3.39499	2.39997	2.47618	3.8693	1.00624	4.1211	2.45739	2.81127	78.6622	73.0267	75.8445	3.06401	6.41895	6.30713	6.42776	6.53176	6.30106	0.95768	7.31598	5.20147	3.82686	937.688	1042.73	1032.15	741.193	751.803	1.31031	0.993211	1.6274	49.5752	3.89948
109	15.9317	22.7198	19.3258	0.373812	1.31099	15.9317	2.22714	1.53511	2.03481	4.03088	1.28686	2.6265	2.91268	-30.046	27.7557	4.19207	5.53481	3.50742	3.13309	1.73331	2.14285	3.20264	1.00624	5.28777	1.62406	2.64461	80.2956	72.9934	76.6445	2.53068	5.75228	5.80713	5.59443	8.03176	8.30106	2.26455	8.31598	5.53481	3.60464	878.309	1002.1	925.82	699.923	702.527	1.06031	0.993211	1.1274	51.9085	4.78837
11	16.135	22.5671	19.351	0.529488	1.43623	16.135	2.0979	1.54445	2.16174	2.09882	1.03264	3.88252	2.31975	-30.543	29.3425	4.73182	6.55865	3.57031	3.34414	1.60973	2.43421	3.43881	1.01299	4.73253	2.31431	3.28559	80.9436	72.5185	76.7311	2.72097	6.62835	6.97142	6.18539	6.58571	6.30106	0.26319	7.43817	6.55865	4.39254	878.193	986.432	930.52	687.43	725.663	1.11465	1.29213	0.94091	45.858	4.62091
110	16.3984	21.7198	19.0591	0.397145	1.40099	16.3984	2.43987	1.53511	2.70147	4.03088	1.12019	3.36752	3.21843	-30.321	23.3407	4.52541	5.20147	3.84075	3.23395	2.06664	1.80952	3.6193	1.00624	4.78777	2.11427	2.68942	79.5622	75.3934	77.4778	2.86401	7.32977	7.30713	7.24539	6.82751	7.30106	1.30236	6.95584	5.20147	4.72216	881.548	1017.03	922.587	698.468	705.866	1.14819	1.15988	1.14289	45.5752	4.35147
111	14.7984	22.4531	18.6258	0.387145	1.59766	14.7984	2.21654	1.70178	1.70147	3.69755	1.45353	2.41074	2.94538	-30.0525	25.5198	4.19207	5.20147	4.00742	3.46519	2.73331	2.47618	3.6193	1.00624	4.78777	2.09861	3.33637	81.5622	72.9934	77.2778	2.86401	7.21344	7.14046	7.19052	6.74069	6.96772	0.424073	7.03311	5.20147	4.06496	834.864	950.365	850.353	673.549	681.833	1.64875	1.15988	2.13498	53.9085	5.10763
112	18.8984	25.2198	22.0591	0.517145	1.46766	18.8984	2.08798	1.20178	1.70147	4.03088	0.953526	3.59996	1.54665	-30.2925	25.9916	4.85874	5.20147	3.67409	2.80099	1.39997	1.97618	2.3693	1.00624	5.1211	1.6495	2.45285	80.3289	73.8267	77.0778	1.86401	6.87446	6.4738	7.165	8.15617	8.30106	1.92906	8.59886	5.20147	3.77168	849.569	972.232	876.853	686.321	680.487	1.3052	1.15988	1.45315	47.2418	4.358
113	15.465	21.0865	18.2758	0.533812	1.33433	15.465	2.25579	1.36844	1.70147	4.36422	1.45353	3.21748	2.18573	-30.2355	25.5766	4.52541	5.20147	4.67409	3.25899	2.39997	1.97618	3.95264	1.00624	4.95444	1.80639	1.99765	80.4289	74.3601	77.3945	3.13068	7.20195	6.9738	7.31596	6.28525	6.30106	-0.0999709	6.90538	5.20147	4.70629	847.082	961.298	909.587	658.7	676.989	1.72641	1.32654	2.13531	48.2418	4.58777
118	16.9984	21.7198	19.3591	0.487145	1.43099	16.9984	1.61176	1.53511	1.36814	2.03088	0.953526	2.2265	1.57935	-30.5665	23.089	4.85874	5.53481	3.00742	4.03785	3.06664	2.80952	4.53597	2.33957	5.6211	1.95739	3.64461	76.8622	73.3601	75.1112	3.86401	6.66895	6.64046	6.59443	8.53176	8.63439	0.865952	8.98265	5.53481	4.2713	729.94	807.732	740.487	621.51	567.163	1.39364	1.15988	1.6274	53.9085	5.78837
12	16.2683	22.9338	19.601	0.569488	1.29957	16.2683	1.64196	1.04445	2.16174	1.43215	1.03264	2.98934	1.34734	-30.3985	29.0908	4.06515	6.22531	3.23698	3.7909	2.27639	2.26754	3.93881	2.01299	5.06586	2.65743	4.07411	80.3769	73.7519	77.0644	3.32097	6.05087	6.13808	5.86777	3.62827	2.63439	-0.446916	6.11697	6.22531	4.94168	1131.47	1235.53	1320.75	860.795	925.453	1.02676	1.12547	0.92542	37.1913	2.72447
120	13.8317	20.9865	17.4091	0.350478	1.29099	13.8317	2.59371	1.03511	5.36814	5.03088	1.28686	3.36752	1.55176	-30.5715	25.3407	3.85874	4.53481	5.67409	2.49585	1.73331	1.14285	2.28597	1.00624	3.95444	1.28094	2.68942	80.6289	74.2934	77.4612	1.79734	6.74643	6.30713	7.07872	5.99418	4.63439	0.749654	7.95584	4.53481	4.16661	1062.64	1180.86	1179.35	846.225	861.896	1.31486	1.15988	1.47622	38.9085	2.6848
121	16.6317	21.9865	19.3091	0.523812	1.76433	16.6317	1.93984	1.53511	1.36814	3.03088	0.953526	3.26663	1.54665	-30.537	29.9916	4.85874	5.53481	2.50742	4.20575	3.39997	3.14285	4.78597	1.67291	5.95444	2.48284	3.28618	82.0289	69.8934	75.9612	3.93068	6.7078	6.9738	6.33167	7.9895	8.30106	2.16584	8.26552	5.53481	4.25543	869.853	1017.03	909.587	675.491	694.92	1.3052	0.993211	1.61982	43.9085	3.358
122	18.3317	22.5198	20.4258	0.477145	1.53099	18.3317	1.9769	1.70178	1.03481	3.03088	1.28686	2.15263	2.94027	-30.309	27.5041	4.85874	5.53481	3.17409	4.17509	3.06664	2.97618	4.45264	2.33957	5.78777	2.13384	4.26647	76.3956	71.0601	73.7278	3.79734	6.9248	7.30713	6.44347	8.40268	8.63439	0.275062	8.67613	5.53481	4.59822	679.321	780.832	656.22	562.065	534.667	2.13909	1.82654	2.44524	56.5752	5.66971
123	15.7984	21.9198	18.8591	0.590478	1.48766	15.7984	2.22656	1.53511	2.36814	3.36422	1.12019	2.6146	3.28382	-30.3425	27.5355	4.19207	5.20147	3.00742	3.63625	2.73331	2.47618	4.1193	1.00624	5.28777	2.06337	3.07294	81.5956	74.6267	78.1112	3.26401	6.25208	6.30713	6.10424	8.0787	8.30106	2.32943	8.39009	5.20147	3.97614	883.868	1017.03	934.887	699.505	700.833	1.07507	0.993211	1.15805	50.5752	4.1011
124	15.465	22.3865	18.9258	0.437145	1.50433	15.465	1.47902	1.03511	1.03481	3.03088	0.953526	1.58447	1.57935	-30.218	27.7557	4.52541	5.86814	3.67409	4.22833	3.39997	2.97618	4.20264	2.33957	6.6211	2.12406	4.14461	81.0289	73.4267	77.2278	3.59734	6.50228	6.4738	6.42776	8.03176	8.30106	2.4234	8.31598	5.86814	4.60464	891.918	1017.03	963.087	684.587	720.097	1.06031	0.993211	1.1274	53.2418	4.01059
126	16.7189	20.3565	18.5377	0.461142	1.02281	16.7189	2.818	1.5778	4.30002	3.98773	1.71482	3.71549	3.02522	-30.5	28.747	4.81584	5.1179	4.89015	3.07843	1.17362	2.25396	3.25663	1.01067	4.74626	0.843112	3.63904	79.7954	72.7902	76.2928	2.57476	6.51112	6.70415	6.21197	5.32263	4.63439	-0.491051	6.55008	5.1179	3.84761	956.358	1041.73	1059.09	748.683	792.917	1.28073	1.01955	1.53815	47.3971	5.21422
127	17.6856	20.2232	18.9544	0.294475	0.95948	17.6856	2.19419	1.24446	2.96668	3.65439	1.21482	3.12139	2.00274	-30.5155	32.0143	4.48251	5.45123	3.39015	3.18368	1.84028	2.42063	3.4233	1.01067	5.41293	1.13143	2.58709	81.2288	71.7569	76.4928	2.70809	5.87724	5.70415	5.94332	6.95638	6.96772	1.15892	7.54691	5.45123	3.98744	897.816	988.232	951.553	710.042	759.196	1.62827	1.18622	2.07671	43.0638	4.43746
128	17.7856	22.9565	20.371	0.387809	1.18281	17.7856	2.62993	1.5778	2.63335	3.32106	1.38149	4.75243	2.697	-30.653	27.7627	5.14917	4.78456	3.22349	2.72568	1.17362	1.92063	2.50663	1.01067	4.74626	1.14121	2.70895	81.6621	71.4236	76.5428	1.97476	6.13309	6.20415	5.95902	7.99397	8.30106	1.78936	8.24039	4.78456	3.42546	837.601	939.432	875.653	664.357	688.093	1.62372	1.35289	1.89456	49.0638	5.42992
13	16.2189	21.8898	19.0544	0.354475	1.11948	16.2189	2.01301	1.41113	2.30002	2.32106	1.04815	3.41763	2.05792	-30.489	24.8444	4.48251	5.45123	3.89015	3.3153	1.84028	2.75396	3.58997	1.01067	4.57959	1.31766	3.49747	79.6288	70.2902	74.9595	2.84143	6.72227	6.70415	6.6414	5.53155	4.30106	-1.14874	7.2672	5.45123	4.53016	928.571	1017.03	1018.05	714.072	781.631	1.2025	1.01955	1.37907	46.0638	3.64459
130	17.3856	20.2232	18.8044	0.447809	0.75948	17.3856	2.22059	1.41113	2.96668	2.65439	1.04815	3.72532	2.39636	-31.0035	30.1935	4.48251	5.78456	4.05682	3.3673	1.84028	2.42063	3.50663	1.01067	5.07959	1.28243	3.90071	81.0621	72.9569	77.0095	2.77476	6.09425	6.03748	6.05512	3.45019	2.30106	-1.37525	6.36174	5.78456	4.88578	1080.5	1180.66	1235.45	816.122	906.407	1.0455	1.01955	1.0688	40.0638	4.52695
131	16.3523	21.1232	18.7377	0.294475	1.01281	16.3523	2.04183	1.24446	2.96668	2.32106	1.21482	3.40159	1.70211	-30.278	31.1117	4.48251	6.1179	4.05682	2.99197	1.50695	2.0873	3.25663	1.01067	4.24626	0.772645	3.61218	82.0288	72.2236	77.1262	2.57476	5.8384	6.20415	5.37274	3.64381	1.96772	-1.00172	8.2813	6.1179	5.00331	1141.06	1218.93	1300.45	853.78	1008.33	0.966714	1.01955	0.917626	36.7305	3.20117
132	16.3189	20.4232	18.371	0.257809	1.01948	16.3189	2.26059	1.24446	3.96668	1.98773	1.04815	3.47532	3.06303	-30.4585	28.5268	4.81584	5.1179	3.72349	3.29588	1.84028	2.75396	3.50663	1.01067	4.74626	1.11576	3.56737	80.9288	70.6902	75.8095	2.77476	6.17758	5.87082	6.38845	5.20548	3.96772	-0.0221789	7.31775	5.1179	4.99689	1053.64	1145.13	1172.12	825.645	888.29	0.962164	1.01955	0.902136	40.3971	2.86029
134	16.0856	20.8565	18.471	0.457809	0.97948	16.0856	1.49118	1.0778	2.30002	1.32106	1.04815	1.91649	1.39636	-30.436	30.1935	4.48251	5.45123	4.22349	2.91492	1.17362	1.75396	3.08997	1.01067	4.41293	1.78243	2.73404	80.9288	71.8236	76.3762	2.44143	6.34425	6.37082	6.22178	2.48107	1.96772	-1.3304	NA	5.45123	5.21912	1112.9	1189.2	1265.25	865.212	948.573	0.962164	1.01955	0.902136	34.3971	2.41584
135	15.4523	20.2898	17.871	0.214475	0.862814	15.4523	1.46104	1.41113	1.96668	0.987727	1.04815	1.83935	1.39125	-30.4245	30.8444	4.48251	5.1179	3.39015	3.29149	1.50695	2.25396	3.6733	1.01067	4.91293	1.31766	3.49747	81.4288	71.2236	76.3262	2.90809	6.22227	6.53748	5.80806	2.14774	1.63439	-1.50076	NA	5.1179	4.9746	1126.86	1189.2	1308.29	878.798	947.657	0.952504	1.01955	0.879067	33.0638	3.31126
138	16.3189	20.2898	18.3044	0.261142	0.812814	16.3189	2.23028	1.24446	3.30002	3.98773	1.04815	3.03935	2.05792	-30.147	31.5111	4.14917	5.1179	3.55682	3.14863	1.84028	2.25396	3.50663	1.01067	4.74626	0.98433	3.16414	81.1954	72.2236	76.7095	2.77476	5.88894	5.70415	5.97473	5.86489	4.63439	0.736733	7.60054	5.1179	4.53016	1061.54	1172.13	1163.55	838.812	888.157	0.952504	1.01955	0.879067	40.7305	3.08904
139	17.3317	23.0865	20.2091	0.580478	1.58766	17.3317	2.43987	1.20178	2.03481	4.36422	1.12019	3.96752	3.21843	-30.217	30.0073	3.85874	4.86814	3.84075	3.35299	2.39997	2.47618	4.03597	1.00624	4.95444	1.61427	2.18942	81.7956	71.9267	76.8612	3.19734	6.49643	6.64046	6.24539	8.32751	8.63439	3.15357	8.6225	4.86814	4.16661	925.913	1042.73	1008.65	723.022	747.006	1.14819	1.15988	1.14289	46.5752	2.6848
14	15.8189	21.6232	18.721	0.301142	1.04615	15.8189	1.53746	1.51303	1.96668	1.65439	1.04815	1.92139	1.33608	-30.6	28.0143	4.14917	6.1179	3.89015	3.37416	1.84028	2.25396	3.50663	1.01067	4.91293	2.13143	3.42042	82.1954	73.1236	77.6595	2.77476	6.21058	5.87082	6.44332	4.95638	3.63439	-2.11848	6.88025	6.1179	4.6541	902.607	988.232	967.453	704.815	767.689	0.961606	1.01955	0.910046	44.7305	3.54857
142	16.465	21.6198	19.0424	0.750478	1.35766	16.465	2.59048	1.03511	2.36814	3.69755	0.953526	4.68103	4.27361	-29.915	29.5041	4.52541	4.86814	4.00742	2.88938	2.06664	1.97618	3.1193	1.00624	4.45444	1.63384	1.93313	79.5289	73.7934	76.6612	2.46401	7.09147	7.4738	6.61013	7.90268	7.63439	2.12624	8.67613	4.86814	4.59822	923.572	1042.73	1002.15	735.955	729.951	1.05575	0.993211	1.11191	42.2418	2.66971
144	18.5984	23.2865	20.9424	0.703812	1.48099	18.5984	2.6488	1.20178	2.36814	4.69755	1.12019	4.01911	4.24602	-29.856	27.7557	3.85874	5.20147	3.00742	3.34738	2.39997	2.64285	3.6193	1.33957	4.78777	1.79072	2.64461	80.7622	74.4934	77.6278	2.93068	6.66895	6.30713	6.92776	8.3651	8.30106	2.87728	8.98265	5.20147	4.16019	930.8	1042.73	1018.05	734.5	745.047	1.06031	0.993211	1.1274	45.5752	2.67726
145	17.3016	21.8338	19.5677	0.509488	1.2129	17.3016	1.66788	1.21111	2.16174	2.09882	1.03264	2.25408	1.64798	-30.4755	27.3268	5.06515	5.22531	3.07031	3.12546	1.60973	1.93421	3.52215	1.01299	4.23253	1.51621	3.38235	80.7769	74.7852	77.7811	2.78763	6.75638	6.63808	6.77167	7.2477	6.63439	-0.195675	8.41452	5.22531	4.37025	810.328	908.532	857.953	639.987	651.97	1.68832	0.9588	2.41784	49.858	5.07188
146	18.0856	23.9232	21.0044	0.331142	1.33615	18.0856	2.32224	1.5778	2.30002	3.32106	1.04815	3.95243	2.36366	-30.3895	27.7627	5.48251	5.45123	3.22349	2.82092	1.84028	2.0873	2.4233	1.01067	4.74626	0.974546	3.20895	79.8288	71.0902	75.4595	1.90809	6.54976	6.70415	6.29236	8.3273	8.30106	1.67971	8.90706	5.45123	3.53657	828.208	939.432	875.653	646.16	668.717	1.20705	1.01955	1.39456	53.3971	4.65214
147	16.0856	21.9232	19.0044	0.211142	1.28615	16.0856	2.16183	1.24446	2.30002	2.65439	1.21482	3.90159	2.36877	-30.31	28.7784	5.14917	4.78456	3.89015	3.23007	1.84028	2.0873	3.83997	1.01067	4.41293	0.939312	3.61218	81.7621	69.7569	75.7595	3.04143	6.50506	6.70415	6.20608	6.83198	6.63439	1.10302	7.59737	4.78456	3.8922	921.583	1017.03	995.053	723.957	767.563	0.966714	1.01955	0.917626	49.0638	5.64561
148	16.035	21.7338	18.8844	0.596154	1.26623	16.035	1.68125	1.04445	2.16174	2.09882	1.03264	2.21612	2.28195	-30.6965	29.5627	5.06515	4.55865	3.73698	4.34098	2.60973	2.60088	4.68881	2.67966	5.3992	2.87499	5.02392	80.0436	73.0852	76.5644	4.0543	6.79523	6.80475	6.67558	5.70544	5.63439	0.354053	6.36406	4.55865	4.35437	943.088	1045.26	1023.05	736.235	785.417	0.933212	0.9588	0.910262	44.1913	2.97484
149	15.6683	19.4338	17.551	0.456154	1.0629	15.6683	1.89479	1.28032	1.82841	3.43215	1.03264	2.37026	2.31464	-30.359	27.3268	4.06515	5.22531	3.23698	3.26832	1.94306	2.10088	3.43881	1.01299	5.06586	1.51621	3.38235	77.6769	72.3519	75.0144	2.72097	6.67305	6.47142	6.77167	8.08103	7.96772	1.31104	8.74786	5.22531	4.37025	825.181	907.498	863.853	673.757	672.747	1.43832	0.9588	1.91784	50.1913	5.07188
15	16.6856	21.6565	19.171	0.554475	1.05948	16.6856	1.57106	1.0778	2.30002	0.987727	1.04815	2.41141	1.72459	-30.444	30.1778	4.81584	6.45123	4.72349	3.5772	1.84028	2.42063	3.75663	1.01067	5.07959	1.651	4.49747	79.8288	71.9569	75.8928	2.97476	5.63894	5.37082	5.80806	3.66046	2.63439	-1.56047	6.20281	6.45123	5.30793	1036.08	1093.43	1179.35	794.198	893.831	0.952504	1.01955	0.879067	37.3971	3.42237
150	15.1523	20.9232	18.0377	0.364475	1.14948	15.1523	2.00318	1.0778	2.30002	2.32106	1.04815	3.25847	2.72459	-30.5135	27.5111	4.48251	4.78456	3.89015	3.12482	1.84028	2.25396	3.1733	1.01067	5.24626	0.817663	3.3308	81.1954	69.1569	75.1762	2.50809	6.47227	6.03748	6.80806	5.36489	3.63439	-0.540397	7.60054	4.78456	4.53016	1037.8	1091.13	1140.52	828.835	907.204	0.952504	1.01955	0.879067	39.0638	2.7557
151	14.9683	20.6338	17.801	0.299488	0.892901	14.9683	1.36529	1.04445	1.82841	1.43215	1.03264	1.76527	1.30954	-30.556	29.9778	4.06515	5.55865	4.73698	3.26393	1.27639	2.26754	3.43881	1.01299	4.73253	1.71811	3.64578	81.8769	77.5185	79.6977	2.72097	5.96774	5.63808	6.19128	3.14774	2.63439	0.220683	NA	5.55865	4.45907	1188.66	1292.43	1354.05	917.07	1008.09	0.928661	0.9588	0.894772	32.5246	3.74507
152	17.835	20.6671	19.251	0.496154	1.06957	17.835	1.67726	1.21111	1.82841	2.09882	1.03264	2.53775	1.62039	-30.7565	26.9117	4.39848	5.55865	3.57031	3.82156	2.27639	2.60088	3.93881	1.34632	5.73253	1.83976	4.42716	81.4769	73.5852	77.5311	3.18763	6.83387	6.47142	7.0893	6.54345	5.63439	-0.427966	8.05438	5.55865	4.93222	876.095	1001.63	951.553	678.335	690.619	1.60954	1.12547	2.1	48.5246	4.52387
153	17.7016	22.7338	20.2177	0.646154	1.3229	17.7016	1.83977	1.21111	2.16174	2.43215	1.03264	2.71306	2.0089	-30.5895	33.4085	4.73182	5.22531	4.07031	3.7627	1.94306	2.43421	4.02215	1.34632	5.23253	1.69266	4.83755	81.0769	71.3519	76.2144	3.2543	6.4289	6.47142	6.28738	6.78528	5.96772	0.27118	8.108	5.22531	3.69716	907.433	1011	981.453	703.938	749.844	0.93377	0.9588	0.902352	45.858	2.95322
154	16.0189	21.3898	18.7044	0.294475	1.18948	16.0189	1.7876	1.31303	2.30002	1.32106	1.04815	2.97532	2.06303	-30.6935	30.1935	4.81584	5.45123	3.05682	3.20064	1.50695	2.25396	3.50663	1.01067	5.24626	0.949097	3.23404	81.8954	71.2236	76.5595	2.77476	6.09425	6.20415	5.88845	5.53623	3.96772	-0.261711	7.62418	5.45123	4.55245	1033.12	1118.13	1147.75	818.759	864.463	0.962164	1.01955	0.902136	35.7305	3.19362
155	15.1523	22.0232	18.5877	0.271142	1.52948	15.1523	1.62993	1.41113	1.63335	1.98773	1.04815	2.15243	1.697	-30.8135	27.7627	5.48251	5.45123	4.05682	3.39235	1.84028	2.5873	3.83997	1.01067	4.57959	1.30788	3.70895	80.1954	64.8236	72.5095	3.04143	7.29976	7.53748	6.95902	6.8273	5.96772	-0.623159	8.24039	5.45123	4.53657	830.818	930.265	860.053	656.99	693.093	1.37372	1.01955	1.72789	41.7305	4.42992
157	16.4189	22.3898	19.4044	0.391142	1.18948	16.4189	1.78096	1.5778	2.30002	1.98773	1.04815	2.38215	1.69189	-30.6305	30.4137	4.14917	6.1179	4.22349	3.38796	1.84028	2.42063	3.58997	1.01067	5.41293	1.00978	3.80571	80.7288	70.8236	75.7762	2.84143	5.67779	6.37082	4.87863	4.82263	3.96772	-1.91415	6.21674	6.1179	4.62539	891.557	971.965	939.253	709.46	762.537	0.947395	1.01955	0.871488	43.7305	3.65867
159	16.5856	21.6898	19.1377	0.554475	1.00615	16.5856	2.735	1.41113	4.30002	3.65439	1.04815	4.44039	3.39636	-30.4525	31.5268	4.48251	4.78456	3.72349	3.3673	1.84028	2.5873	3.50663	1.01067	5.24626	1.11576	3.73404	80.8288	73.6902	77.2595	2.77476	6.26091	5.87082	6.55512	6.7072	5.96772	2.39382	8.43268	4.78456	4.21912	1089.27	1180.66	1222.02	845.599	925.453	0.962164	1.01955	0.902136	36.3971	2.86029
16	15.6683	21.7671	18.7177	0.449488	1.03623	15.6683	1.71667	1.21111	2.16174	2.43215	1.03264	2.45625	1.34734	-30.342	29.7575	4.06515	5.22531	3.73698	3.24328	1.94306	2.10088	3.60548	1.01299	4.3992	1.65743	3.40745	81.5103	73.6185	77.5644	2.8543	5.80087	5.97142	5.53443	5.12329	4.96772	-0.85587	5.79831	5.22531	4.83057	896.549	1011	967.453	699.739	724.65	0.943429	0.9588	0.92542	44.1913	3.94669
160	16.1856	21.5565	18.871	0.111142	1.00281	16.1856	2.255	1.0778	3.30002	2.32106	1.21482	3.44039	3.39636	-30.422	30.8601	3.81584	5.1179	3.22349	3.31969	1.84028	2.42063	3.50663	1.01067	5.07959	0.949097	3.90071	82.5954	71.2902	76.9428	2.77476	6.01091	5.70415	6.22178	6.53623	4.96772	0.602754	8.62418	5.1179	4.77467	1021.5	1091.13	1133.29	818.759	859.487	1.21216	1.01955	1.40214	44.3971	3.19362
162	15.5523	20.8232	18.1877	0.457809	0.946147	15.5523	2.06206	1.0778	2.63335	2.98773	1.04815	3.39949	2.03033	-30.191	30.4294	4.81584	5.45123	3.89015	3.10663	2.17362	2.42063	3.25663	1.01067	4.91293	0.974546	2.87561	79.6621	71.9236	75.7928	2.57476	5.96642	6.03748	5.79236	6.66063	5.63439	0.512968	8.24039	5.45123	4.42546	956.702	1058.86	1059.09	727.147	798.84	0.957055	1.01955	0.894557	41.0638	3.31881
164	16.4189	21.8232	19.121	0.294475	1.07948	16.4189	1.76574	1.0778	2.30002	1.98773	1.04815	2.89344	1.66941	-30.251	30.681	4.48251	5.78456	3.72349	3.25511	1.50695	2.75396	3.58997	1.01067	4.91293	0.798094	3.42042	81.7621	71.0569	76.4095	2.84143	5.62724	5.87082	5.27665	5.12305	3.30106	-0.236394	7.54691	5.78456	4.6541	1092.4	1199.8	1206.22	845.878	935.446	1.21161	1.01955	1.41005	39.0638	3.10413
166	17.0683	22.1338	19.601	0.446154	1.0129	17.0683	1.84196	1.04445	2.16174	2.76549	1.03264	2.73934	2.01401	-30.7855	32.4242	3.73182	5.22531	3.57031	3.45757	1.94306	2.43421	3.68881	1.67966	4.56586	1.99076	3.57411	81.2436	75.8519	78.5477	3.0543	5.55087	5.30475	5.7011	5.13199	4.30106	0.547418	7.13182	5.22531	4.1639	1073.88	1153.56	1188.55	855.922	914.107	0.943429	0.9588	0.92542	42.858	3.39114
167	18.0683	22.8671	20.4677	0.759488	1.3029	18.0683	1.7985	1.04445	1.82841	2.76549	1.03264	2.95738	1.67557	-30.541	32.4085	4.39848	5.22531	3.40364	3.57223	1.94306	2.26754	3.68881	1.34632	5.06586	2.026	4.17088	80.6436	75.6519	78.1477	2.98763	6.1789	5.97142	6.28738	6.61862	5.30106	1.03132	8.44133	5.22531	4.58605	1029.66	1139.03	1133.29	814.785	848.051	0.93377	0.9588	0.902352	42.1913	3.06433
168	16.6683	23.0004	19.8344	0.342821	1.2529	16.6683	2.29907	1.54445	2.49508	3.09882	1.1993	3.74051	2.68067	-30.347	34.0908	3.73182	5.89198	3.90364	3.64804	1.94306	2.43421	3.77215	1.34632	5.3992	1.65743	4.40745	82.7769	76.5185	79.6477	3.0543	6.30087	6.13808	6.36777	6.78996	5.96772	0.8037	8.13165	5.89198	4.05279	953.052	1029.73	1027.55	780.912	790.657	1.44343	1.12547	1.75875	43.1913	3.83558
17	17.2016	21.6004	19.401	0.526154	1.1029	17.2016	1.79716	1.21111	2.16174	2.43215	1.03264	2.40567	2.01912	-30.0145	27.1065	4.06515	4.89198	3.40364	3.41433	2.27639	2.26754	3.68881	1.34632	4.8992	1.6222	3.47735	81.2769	74.6519	77.9644	2.98763	5.92284	6.13808	5.61482	5.62797	4.63439	-0.796551	7.1553	4.89198	4.07509	930.186	1011	993.153	760.535	775.681	0.953089	0.9588	0.948489	42.5246	4.2735
171	17.3523	23.4565	20.4044	0.427809	1.16948	17.3523	3.18243	1.74446	3.96668	3.98773	1.54815	5.72645	3.72459	-30.7685	27.5111	4.14917	5.1179	3.72349	3.02958	1.84028	1.75396	3.33997	1.01067	4.91293	0.98433	2.99747	78.8288	73.3569	76.0928	2.64143	6.80561	6.87082	6.6414	7.03155	7.96772	1.46873	6.60054	5.1179	4.41904	838.69	921.098	854.153	695.442	700.567	2.86917	1.35289	4.37907	50.0638	5.64459
172	16.0317	22.4865	19.2591	0.607145	1.45766	16.0317	2.18868	1.20178	2.70147	4.36422	0.953526	2.4265	3.24602	-30.3935	27.7557	4.19207	4.86814	3.17409	3.37118	2.06664	2.30952	3.78597	1.00624	4.78777	1.79072	3.14461	81.8289	71.9934	76.9112	2.99734	6.50228	6.4738	6.42776	7.3651	7.30106	1.88647	7.98265	4.86814	4.49352	931.588	1042.73	1018.45	730.493	751.803	1.06031	0.993211	1.1274	46.5752	3.1217
173	17.165	24.0865	20.6258	0.563812	1.54433	17.165	2.23385	1.70178	2.03481	4.03088	0.953526	3.0316	2.60183	-30.0575	25.4884	4.19207	5.86814	3.67409	3.33737	2.06664	1.97618	3.6193	1.00624	5.28777	2.00241	2.86323	81.0289	73.9934	77.5112	2.86401	6.4695	6.30713	6.52974	8.06467	8.30106	1.87722	8.31914	5.86814	3.79814	845.128	972.232	869.753	689.231	665.655	1.7961	1.32654	2.25551	50.5752	4.89846
174	15.4317	23.9531	19.6924	0.410478	1.67099	15.4317	2.97687	1.86844	3.36814	5.36422	1.45353	3.76663	3.87999	-29.624	29.9916	4.19207	5.20147	3.34075	3.34861	2.39997	2.64285	3.78597	1.00624	4.78777	1.98284	2.28618	80.1289	73.3601	76.7445	2.99734	6.54113	6.14046	6.83167	7.4895	7.96772	1.89684	7.59886	5.20147	4.69987	875.365	1002.1	909.587	701.658	705.733	1.0552	0.993211	1.11982	50.9085	4.80244
176	16.3984	22.3531	19.3758	0.637145	1.40766	16.3984	2.71761	1.20178	4.36814	4.69755	1.28686	3.26663	3.87999	-30.3535	29.9916	3.85874	4.20147	3.17409	2.80099	2.06664	2.14285	2.8693	1.00624	4.6211	1.31617	1.78618	80.0622	74.1934	77.1278	2.26401	6.54113	6.14046	6.83167	7.65617	7.30106	2.6632	8.59886	4.20147	4.14431	998.127	1115.33	1094.75	794.615	805.427	1.3052	0.993211	1.61982	46.9085	2.69133
178	17.1189	21.2232	19.171	0.311142	1.22281	17.1189	5.04022	4.74446	6.96668	5.65439	3.21482	6.04882	4.69189	-30.577	30.4137	3.48251	4.78456	2.89015	3.2451	1.17362	2.25396	3.50663	1.01067	4.91293	1.00978	3.97238	79.6288	73.7569	76.6928	2.77476	6.42779	6.53748	6.21197	6.15596	6.63439	0.860235	6.21674	4.78456	2.95872	900.784	1017.03	963.253	701.683	738.157	1.6974	1.01955	2.37149	55.3971	5.88089
179	16.8856	21.0898	18.9877	0.467809	0.96948	16.8856	1.63281	1.0778	2.30002	1.65439	1.04815	2.54882	1.35856	-30.9065	27.747	5.48251	5.45123	5.89015	2.81653	1.17362	2.25396	3.08997	1.01067	4.07959	0.843112	2.80571	81.3621	69.4236	75.3928	2.44143	7.01112	7.20415	6.71197	5.48929	3.63439	-1.42206	7.88341	5.45123	4.40317	962.268	1041.73	1076.92	780.11	767.297	0.947395	1.01955	0.871488	34.7305	1.65867
180	15.4189	19.4565	17.4377	0.191142	0.882814	15.4189	1.72727	1.0778	2.63335	1.98773	1.04815	2.29344	2.00274	-30.6765	30.681	5.14917	4.78456	5.72349	3.15987	1.84028	2.42063	3.33997	1.01067	5.07959	0.964761	3.08709	81.2288	68.8236	75.0262	2.64143	7.12724	7.37082	6.77665	4.95638	2.63439	-1.27738	7.88025	4.78456	4.43188	1060.33	1172.13	1163.55	819.038	904.353	0.961606	1.01955	0.910046	32.3971	1.65969
181	16.3523	20.5898	18.471	0.431142	1.08615	16.3523	1.78378	1.0778	2.96668	1.98773	1.04815	2.75243	1.36366	-30.246	30.4294	5.48251	5.1179	4.55682	2.67806	1.50695	1.75396	3.00663	1.01067	3.74626	0.641212	2.87561	79.9288	70.8902	75.4095	2.37476	6.79976	7.53748	5.95902	3.84491	2.30106	-1.64865	8.08568	5.1179	4.7588	1057.08	1180.66	1105.82	837.357	921.607	0.957055	1.01955	0.894557	29.3971	1.76325
182	14.4317	20.5531	17.4924	0.347145	1.09099	14.4317	1.18868	1.03511	1.70147	1.36422	0.953526	1.2265	0.912684	-30.4795	33.089	3.85874	4.86814	3.17409	2.89499	1.73331	1.64285	3.03597	1.00624	4.6211	1.62406	2.47794	80.4622	75.5601	78.0112	2.39734	6.08562	5.80713	6.26109	4.04528	3.30106	-0.244581	5.88719	4.86814	5.04908	1091.69	1219.63	1208.59	853.13	902.56	1.06031	0.993211	1.1274	37.2418	2.78837
185	14.4016	20.3004	17.351	0.419488	1.1429	14.4016	1.55679	1.04445	1.49508	2.43215	1.03264	2.11128	1.62039	-29.8625	27.5784	4.73182	5.89198	4.57031	3.98823	2.27639	2.43421	4.35548	1.67966	5.3992	2.33976	4.59383	81.4103	75.8519	78.6311	3.58763	6.33387	6.47142	6.0893	5.87678	4.63439	0.120726	7.72104	5.89198	4.82111	1008.77	1104.43	1149.09	788.078	811.229	1.10954	0.9588	1.26666	39.1913	3.07942
188	16.5189	19.9898	18.2544	0.357809	0.752814	16.5189	1.62993	1.24446	2.30002	1.65439	1.04815	2.35243	1.36366	-30.563	30.4294	4.48251	5.78456	4.72349	3.22568	1.50695	2.0873	3.58997	1.01067	5.07959	0.974546	3.54228	81.2288	73.7569	77.4928	2.84143	5.54976	5.87082	5.12569	2.48107	1.96772	-1.13038	NA	5.78456	4.86991	1130.03	1145.13	1354.05	876.583	961.497	1.12372	1.01955	1.22789	35.7305	3.31881
190	15.465	21.6865	18.5758	0.487145	1.35766	15.465	1.53341	1.20178	1.36814	3.03088	0.953526	1.61911	1.57935	-30.2765	25.7557	4.85874	5.86814	4.50742	4.68071	3.39997	3.64285	4.95264	2.67291	6.6211	2.29072	4.81127	81.8956	72.0267	76.9612	4.26401	7.25228	7.4738	6.92776	5.8651	4.30106	-0.508751	7.98265	5.86814	5.04908	983.397	1058.86	1122.85	744.54	824.46	1.06031	0.993211	1.1274	38.2418	3.1217
191	14.665	21.5531	18.1091	0.470478	1.16766	14.665	1.34724	1.03511	1.03481	2.03088	0.953526	1.76663	1.54665	-30.557	25.9916	5.52541	5.20147	4.34075	4.11051	3.39997	2.64285	4.45264	1.00624	5.45444	2.6495	4.45285	80.9622	76.8601	78.9112	3.53068	7.12446	7.30713	6.83167	4.56424	2.96772	-1.26373	7.33828	5.20147	5.47765	1032.94	1115.33	1195.15	794.615	844.29	1.0552	0.993211	1.11982	37.5752	2.80244
192	16.0984	22.5198	19.3091	0.753812	1.38099	16.0984	2.97459	1.36844	2.36814	4.69755	1.45353	5.19827	3.60183	-30.003	29.4884	4.52541	4.20147	3.17409	3.02784	1.73331	2.14285	3.45264	1.00624	4.28777	1.66907	2.36323	80.3622	74.3934	77.3778	2.73068	6.88616	6.64046	7.02974	8.06467	8.96772	2.30028	7.65248	4.20147	4.46481	824.259	891.665	850.353	695.265	676.112	3.46276	1.49321	5.42218	47.9085	2.89846
193	18.6317	24.4865	21.5591	0.820478	1.41433	18.6317	3.13506	1.53511	3.70147	4.69755	1.62019	5.1515	3.94538	-30.225	31.1864	4.19207	4.20147	2.67409	3.01281	2.06664	1.80952	3.28597	1.00624	4.45444	1.59861	2.6697	79.3956	74.3601	76.8778	2.59734	7.04677	6.9738	7.02386	7.90736	8.63439	2.0762	7.69978	4.20147	3.95385	833.618	947.232	834.12	693.682	676.083	3.89875	1.65988	6.13498	45.2418	4.10763
194	17.9317	24.1531	21.0424	0.583812	1.66433	17.9317	2.7769	1.20178	1.70147	4.69755	1.45353	4.40263	4.94027	-30.8495	29.5041	4.19207	4.20147	3.17409	4.07985	3.39997	2.64285	4.8693	1.33957	5.95444	1.96717	3.43313	80.5622	72.9934	76.7778	3.93068	6.84147	6.9738	6.61013	8.23602	8.30106	2.35993	8.67613	4.20147	4.04266	886.481	1017.03	926.253	701.378	717.761	1.22242	0.993211	1.44524	46.2418	3.33638
195	16.8317	21.8531	19.3424	0.477145	1.30766	16.8317	1.79777	1.36844	1.70147	2.36422	0.953526	2.83701	1.91779	-29.9575	29.7714	4.19207	5.20147	3.84075	3.13748	2.06664	1.80952	3.53597	1.00624	4.45444	1.75549	2.88118	80.1956	75.5934	77.8945	2.79734	6.54092	5.9738	7.00815	6.70311	7.30106	1.90652	6.67296	5.20147	3.96026	933.305	1034.16	1009.05	734.657	772.619	1.06996	0.993211	1.15047	50.9085	4.89295
196	16.1984	22.9198	19.5591	0.500478	1.68099	16.1984	2.80906	1.70178	3.03481	4.69755	1.12019	3.81578	4.24091	-30.4375	31.4067	3.85874	5.53481	3.67409	4.67632	3.73331	3.14285	4.53597	3.00624	6.78777	2.82596	5.0747	82.2622	71.0934	76.6778	3.99734	6.63031	6.64046	6.51404	7.36042	7.63439	1.7376	7.62567	5.53481	5.1379	890.278	1025.6	951.553	694.123	706.827	1.13398	1.15988	1.10433	44.5752	3.57267
199	15.4144	23.7566	19.5855	0.412226	1.94996	15.4144	2.14259	1.34264	1.83677	3.88257	1.46568	3.12595	1.76993	-30.164	32.9032	4.5936	5.45531	3.56261	3.53336	1.81668	2.00231	3.76858	0.970106	4.90011	2.2283	4.21929	80.1987	65.1978	72.6983	2.97621	7.31157	7.33354	7.19059	8.09258	8.30106	1.83358	8.38925	5.45531	4.54356	841.39	956.032	857.953	671.942	696.134	1.8731	1.1951	2.54471	50.0146	4.80233
2	17.735	22.3671	20.051	0.649488	1.48623	17.735	2.6632	1.54445	4.49508	3.43215	1.1993	3.91561	2.98642	-29.698	26.6758	4.06515	6.22531	4.40364	3.72509	2.27639	2.43421	3.85548	2.34632	4.73253	3.14765	3.28559	80.3103	70.7185	75.5144	3.32097	6.71169	6.63808	6.68539	5.25238	4.63439	0.269495	6.43817	6.22531	4.39254	1021.51	1120.3	1133.29	795.14	854.593	1.36465	1.29213	1.44091	45.858	4.62091
21	15.5016	22.5004	19.001	0.399488	1.20957	15.5016	1.88381	1.21111	2.16174	2.09882	1.03264	2.93194	2.30954	-30.075	27.3111	3.73182	5.89198	3.73698	3.71632	2.27639	1.93421	3.85548	1.34632	5.06586	3.55145	3.47912	81.7103	77.5852	79.6477	3.12097	6.21774	6.13808	6.19128	5.74302	4.63439	0.373197	7.39087	5.89198	4.45907	1030.4	1087.46	1156.32	816.796	877.987	0.928661	0.9588	0.894772	40.5246	3.30063
214	17.0856	22.5898	19.8377	0.357809	1.20948	17.0856	1.92863	1.24446	2.30002	2.32106	1.04815	2.9405	2.33608	-30.215	28.0143	4.14917	6.45123	4.22349	3.30273	1.84028	2.0873	3.75663	1.01067	4.74626	1.63143	3.25375	81.7621	71.5902	76.6762	2.97476	5.71058	6.03748	5.27665	5.12305	3.96772	-1.36204	6.88025	6.45123	4.77438	938.854	1017.03	1041.25	714.838	800.053	0.961606	1.01955	0.910046	43.3971	3.88191
215	17.2189	21.1565	19.1877	0.341142	0.982814	17.2189	1.76358	1.41113	1.96668	1.65439	1.04815	2.66633	1.99763	-30.632	27.9987	4.14917	5.78456	3.72349	3.25072	1.84028	1.92063	3.58997	1.01067	5.24626	0.999995	3.51718	81.1288	73.1569	77.1428	2.84143	5.3386	5.87082	4.69626	5.45171	3.96772	-0.823967	7.52326	5.78456	4.40959	984.949	1066.43	1045.09	784.381	861.513	0.951946	1.01955	0.886978	40.0638	3.5551
216	16.2189	21.4232	18.821	0.104475	1.03615	16.2189	1.88288	1.24446	1.96668	2.65439	1.04815	2.89435	1.99763	-30.7575	30.6653	4.48251	5.78456	3.55682	3.39358	1.17362	2.5873	3.58997	1.01067	5.57959	0.833328	4.01718	80.8288	69.7902	75.3095	2.84143	5.5886	5.87082	5.19626	6.78504	6.30106	-0.318664	7.8566	5.78456	4.18736	828.347	862.132	860.053	698.088	710.733	1.86861	1.01955	2.72031	55.3971	4.33288
217	15.9856	20.9232	18.4544	0.137809	0.95948	15.9856	1.57106	1.0778	1.96668	1.65439	1.04815	2.41141	1.39125	-30.0795	30.1778	4.81584	5.78456	3.72349	3.12482	1.50695	2.0873	3.4233	1.01067	4.91293	1.31766	2.99747	82.4288	70.0569	76.2428	2.70809	6.30561	6.70415	5.80806	5.03155	3.63439	-2.48589	6.93387	5.78456	4.86349	871.133	988.232	920.353	670.608	721.841	1.2025	1.01955	1.37907	41.3971	3.7557
218	16.6189	20.9565	18.7877	0.351142	1.06948	16.6189	1.65247	1.41113	2.30002	1.98773	1.04815	2.16633	1.33097	-30.5605	27.9987	4.48251	7.1179	4.89015	3.34596	1.50695	2.0873	3.83997	1.01067	4.57959	0.999995	4.35052	81.3288	70.1236	75.7262	3.04143	5.67194	5.87082	5.36293	5.61837	4.30106	-1.71082	7.52326	7.1179	4.85403	880.419	971.965	951.553	687.848	727.927	2.03528	1.35289	2.72031	39.0638	4.22177
219	16.5856	21.8565	19.221	0.317809	1.08281	16.5856	1.77479	1.0778	2.63335	1.98773	1.04815	2.5405	2.00274	-30.641	29.0143	5.14917	6.45123	4.72349	3.06463	0.840283	2.0873	3.08997	1.01067	5.24626	1.29809	3.25375	82.8288	71.4902	77.1595	2.44143	6.29391	6.37082	6.10998	5.45638	4.30106	-1.17845	7.21358	6.45123	4.32077	926.026	1017.03	1009.05	726.388	769.389	0.961606	1.01955	0.910046	46.3971	3.99302
22	15.635	20.8338	18.2344	0.449488	1.04623	15.635	1.86195	1.04445	3.16174	1.76549	1.03264	3.05499	1.64287	-30.773	31.9778	3.73182	5.89198	3.90364	3.38298	2.27639	2.26754	3.93881	1.67966	4.8992	1.55145	2.64578	82.5103	77.3185	79.9144	3.2543	6.30108	6.13808	6.35795	3.81441	3.30106	0.770414	NA	5.89198	4.68129	1178.65	1277.13	1341.05	889.61	1023.78	0.928661	0.9588	0.894772	35.5246	2.85618
229	17.0683	21.8671	19.4677	0.589488	1.23957	17.0683	2.3852	1.37778	3.82841	3.43215	1.03264	2.88456	3.34734	-30.791	34.4242	4.39848	5.22531	3.07031	3.19566	1.60973	2.26754	3.35548	1.01299	4.06586	1.65743	3.90745	80.9103	74.9852	77.9477	2.6543	5.96754	5.63808	6.2011	7.31395	6.96772	3.03501	8.08892	5.22531	4.38613	1058.53	1120.3	1208.59	833.609	888.29	0.943429	0.9588	0.92542	41.5246	3.61336
230	16.1016	21.7671	18.9344	0.479488	1.17957	16.1016	1.79008	1.04445	2.16174	2.43215	1.03264	2.81442	1.67046	-30.7675	32.3928	4.39848	5.89198	3.73698	4.11546	2.27639	2.26754	4.35548	1.67966	4.8992	3.39456	5.10098	81.5436	78.1852	79.8644	3.58763	6.22359	5.97142	6.37365	5.94728	4.63439	0.518346	7.75102	5.89198	4.45265	1042.83	1132.86	1161.69	823.701	869.425	0.92411	0.9588	0.879283	40.858	3.29308
231	15.035	21.6338	18.3344	0.512821	1.28623	15.035	1.7727	1.04445	2.49508	1.76549	1.1993	2.76527	1.64287	-30.2995	31.9778	4.06515	5.89198	4.07031	3.09727	1.27639	2.10088	3.10548	1.01299	5.06586	1.71811	2.97912	80.0103	73.5519	76.7811	2.4543	5.96774	5.97142	5.85795	2.81441	2.30106	-0.782853	NA	5.89198	5.57018	1131.25	1214.46	1285.12	860.27	982.131	0.928661	0.9588	0.894772	31.858	2.41174
232	17.935	22.6004	20.2677	0.552821	1.1929	17.935	2.34406	1.37778	2.49508	3.09882	1.1993	3.57026	3.31464	-30.572	27.3268	4.39848	5.89198	3.90364	3.57785	2.27639	2.43421	3.77215	1.34632	4.73253	2.18288	3.88235	81.0436	76.3519	78.6977	3.0543	6.33971	6.30475	6.27167	6.7477	6.30106	0.831708	7.74786	5.89198	4.14803	926.896	1020.36	1011.35	741.193	751.803	0.938321	0.9588	0.917841	41.5246	4.2941
233	17.335	23.4004	20.3677	0.536154	1.22623	17.335	1.90803	1.37778	2.49508	2.09882	1.36597	2.93775	1.28706	-30.5915	34.9117	4.06515	5.55865	3.90364	4.01204	2.94306	2.60088	4.35548	2.01299	5.06586	3.17309	3.59383	82.0103	73.7519	77.8811	3.6543	6.00053	6.13808	5.75596	4.3186	3.30106	-0.156238	6.98044	5.55865	4.59889	1099.26	1188.16	1256.32	846.225	924.099	1.7762	0.9588	2.6	38.5246	2.8572
234	15.435	22.7338	19.0844	0.272821	1.31623	15.435	2.0123	1.54445	2.16174	2.43215	1.1993	2.98109	2.00379	-30.534	36.0595	4.73182	5.55865	4.07031	4.11546	3.27639	2.43421	4.60548	1.67966	5.73253	2.2279	4.26764	81.8103	76.7519	79.2811	3.78763	6.55693	6.30475	6.70699	5.30834	4.63439	1.01286	6.55345	5.55865	4.78598	1085.19	1203.83	1222.02	836.038	895.242	2.00744	0.9588	3.04595	36.858	3.18197
236	17.435	23.5338	20.4844	0.649488	1.3529	17.435	2.08196	1.21111	3.16174	2.43215	1.03264	2.98934	2.68067	-30.7645	24.7575	4.39848	5.55865	3.07031	3.45757	1.94306	2.60088	3.52215	1.01299	4.73253	1.8241	4.07411	81.4436	74.3185	77.8811	2.78763	6.21754	5.97142	6.36777	6.31956	5.30106	1.87843	8.1244	5.55865	4.83057	1102.23	1203.83	1265.25	855.922	900.567	0.943429	0.9588	0.92542	38.5246	3.0578
237	16.6683	22.0671	19.3677	0.306154	1.05623	16.6683	2.10603	1.04445	2.49508	3.09882	1.03264	2.93194	3.30954	-30.752	29.3111	4.06515	5.55865	3.40364	3.24012	1.60973	2.60088	3.68881	1.01299	4.23253	1.55145	3.14578	82.9769	76.1852	79.5811	2.92097	6.05108	5.63808	6.35795	6.74302	6.30106	2.17771	7.72421	5.55865	4.12573	1042.2	1120.3	1163.55	830.57	871.384	0.928661	0.9588	0.894772	45.858	4.0784
24	15.535	22.0671	18.801	0.412821	1.2729	15.535	1.88762	1.21111	2.16174	2.76549	1.03264	2.99673	1.64798	-30.018	27.3268	4.39848	6.22531	4.07031	3.55404	2.60973	2.26754	3.85548	1.34632	5.3992	1.84955	3.21569	81.4103	76.3185	78.8644	3.12097	7.00638	7.13808	6.77167	5.46885	4.63439	0.136332	7.04871	6.22531	4.9258	1010.1	1104.43	1126.05	813.607	813.453	1.02165	1.12547	0.917841	43.5246	3.51632
240	16.1016	23.0004	19.551	0.422821	1.41957	16.1016	2.51572	1.54445	2.82841	3.43215	1.1993	4.16697	2.58769	-30.529	36.481	3.73182	4.89198	3.23698	2.98946	1.60973	1.43421	3.02215	1.01299	4.23253	2.03188	3.40207	80.5436	76.1185	78.3311	2.38763	6.12271	5.63808	6.4932	6.50119	6.30106	0.473374	7.33725	4.89198	5.02746	896.199	1001.63	934.887	724.447	742.076	2.0211	1.29213	2.75908	48.858	5.0935
246	18.1317	21.8865	20.0091	0.687145	1.61099	18.1317	1.30321	1.36844	1.36814	2.03088	0.953526	1.22205	0.912684	-30.2885	25.7557	5.52541	5.20147	3.17409	3.4188	2.06664	2.47618	3.78597	1.00624	4.78777	1.79072	3.31127	75.6956	72.7267	74.2112	2.99734	6.33562	6.80713	5.76109	8.81441	8.30106	-0.792195	NA	5.20147	4.04908	616.448	733.532	609.953	481.41	460.322	2.39364	2.15988	2.6274	52.9085	5.23281
248	13.765	18.7198	16.2424	0.347145	1.49099	13.765	1.01654	1.20178	1.03481	1.03088	1.12019	0.160743	0.94538	-29.879	29.5198	5.85874	5.86814	3.34075	4.77471	4.39997	4.14285	4.6193	3.00624	5.45444	3.26527	5.1697	81.2956	71.1934	76.2445	4.06401	7.21344	7.14046	7.19052	6.24069	5.30106	-2.12171	7.69978	5.86814	5.28718	759.553	814.965	797.653	632.122	610.117	1.64875	1.15988	2.13498	47.2418	4.99652
249	15.3016	20.7338	18.0177	0.332821	1.2929	15.3016	1.20826	1.37778	1.16174	1.09882	1.03264	1.02924	1.34223	-30.267	29.7418	5.73182	5.22531	3.23698	4.23889	2.60973	3.60088	4.43881	1.34632	4.8992	3.026	4.83755	79.1769	72.2519	75.7144	3.58763	7.01223	7.13808	6.78738	6.11862	4.96772	-3.2705	7.77467	5.22531	4.47494	689.696	770.932	733.02	555.995	515.337	2.35044	1.4588	3.23568	46.1913	5.28655
25	15.7683	24.2671	20.0177	0.216154	1.4229	15.7683	1.86643	1.04445	2.16174	2.09882	1.03264	2.88279	2.61528	-30.192	27.5627	4.06515	6.22531	3.90364	3.31717	2.27639	1.93421	3.52215	1.01299	4.8992	1.54166	3.69059	82.7769	75.5519	79.1644	2.78763	6.71189	6.63808	6.67558	4.14774	3.63439	0.189457	NA	6.22531	5.24326	1100.32	1163.26	1197.39	869.028	989.223	0.933212	0.9588	0.910262	37.1913	2.08595
250	16.1016	20.4671	18.2844	0.536154	1.0529	16.1016	2.41906	2.04445	2.49508	3.76549	1.1993	3.3951	2.28706	-29.9385	28.2451	5.06515	5.22531	3.07031	3.98823	2.94306	3.10088	3.68881	1.34632	5.06586	4.00643	3.76049	79.4103	75.5185	77.4644	2.98763	6.58387	6.30475	6.75596	6.87678	6.30106	-1.22661	8.05438	5.22531	4.59889	750.567	819.432	812.087	604.948	583.559	2.69287	1.29213	4.1	51.858	6.07942
251	16.6016	20.5004	18.551	0.389488	1.02957	16.6016	1.79236	1.37778	2.16174	2.43215	1.03264	2.54945	1.61528	-30.206	29.5627	4.73182	4.89198	3.07031	3.91241	2.27639	2.43421	4.35548	1.01299	4.56586	2.54166	5.02392	79.9436	74.5185	77.2311	3.4543	7.04523	7.30475	6.67558	8.20544	7.96772	0.147773	9.03073	4.89198	5.02104	725.527	786.265	733.02	617.251	583.19	2.51655	1.12547	3.91026	46.1913	4.97484
252	17.4683	21.9338	19.701	0.372821	1.06957	17.4683	1.34406	1.04445	1.82841	1.43215	1.03264	1.37026	1.64798	-30.3235	27.3268	5.39848	4.89198	3.23698	3.91118	2.27639	2.43421	3.93881	1.01299	5.06586	3.18288	4.71569	79.2103	75.4185	77.3144	3.12097	6.75638	6.97142	6.43834	6.58103	5.30106	-3.24018	8.41452	4.89198	4.48136	663.737	739.265	709.153	535.117	488.543	2.52165	1.29213	3.75117	50.858	5.2941
253	17.835	21.4671	19.651	0.562821	1.23957	17.835	1.6252	1.37778	1.49508	2.09882	1.1993	2.13456	1.34734	-30.212	30.4242	6.06515	5.55865	3.73698	4.36233	3.60973	3.43421	4.27215	1.01299	4.56586	3.8241	5.40745	77.4103	72.9852	75.1977	3.38763	7.05087	7.30475	6.7011	6.45663	5.96772	-2.54687	7.46498	5.55865	5.05279	666.019	723.932	709.153	552.805	494.83	3.44343	1.4588	5.42542	46.1913	5.50225
254	14.0144	23.7566	18.8855	0.562226	1.97662	14.0144	1.51377	1.17598	1.50343	2.2159	0.965683	0.789594	2.44681	-29.941	28.2679	4.5936	5.78865	3.39595	4.78023	4.15002	3.16898	5.01858	2.30344	6.56677	2.8245	5.19242	82.3987	67.0978	74.7483	4.24287	6.72218	7.66688	5.6847	6.968	7.30106	3.18945	6.74549	5.78865	5.36593	1043.21	1139.03	1179.35	777.145	894.096	1.05909	1.02844	1.09085	39.0146	3.0115
26	14.9016	22.0671	18.4844	0.366154	1.22957	14.9016	1.92196	1.21111	2.49508	2.09882	1.03264	3.23934	2.01401	-30.3425	29.0908	4.39848	6.55865	4.07031	3.14804	2.27639	2.10088	3.68881	1.01299	4.06586	1.49076	2.90745	82.1769	73.4852	77.8311	2.92097	6.46754	6.47142	6.36777	4.48107	3.96772	0.243112	NA	6.55865	4.49724	1076.36	1153.56	1159.99	865.322	943.22	0.943429	0.9588	0.92542	42.858	3.0578
264	15.6683	20.2671	17.9677	0.566154	1.36623	15.6683	2.70634	3.37778	2.49508	2.76549	1.1993	3.65408	2.64798	-30.13	29.3268	4.73182	6.22531	3.90364	3.36356	1.94306	3.60088	3.10548	1.01299	4.3992	1.34955	4.04902	82.1769	72.0852	77.1311	2.4543	6.25638	6.13808	6.27167	5.7477	5.30106	-1.754	6.74786	6.22531	5.25914	791.054	826.732	850.353	652.29	651.97	1.43832	1.29213	1.58451	43.858	4.73854
265	14.6016	20.7338	17.6677	0.306154	1.0529	14.6016	2.16788	1.21111	2.82841	2.43215	1.03264	3.85408	2.31464	-30.1765	29.9934	3.73182	4.89198	2.57031	3.29213	2.27639	2.10088	3.18881	1.01299	4.73253	1.84955	3.88235	82.4436	73.9852	78.2144	2.52097	5.33971	4.97142	5.605	6.08103	4.96772	0.532049	7.74786	4.89198	5.37025	1015.45	1104.43	1126.05	813.607	834.83	0.938321	0.9588	0.917841	47.1913	5.84965
266	17.035	23.4432	20.1783	0.596154	1.32204	17.035	1.55048	1.04445	2.16174	1.76549	1.03264	2.26527	1.30954	-30.5805	27.9778	4.06515	5.55865	4.57031	3.59727	1.94306	2.76754	3.52215	1.01299	4.56586	2.88478	3.97912	82.2436	75.8272	79.0354	2.78763	6.21774	6.13808	6.19128	2.14774	1.63439	-0.946418	NA	5.55865	5.34795	1174.35	1238.63	1315.25	931.586	1028.91	0.928661	0.9588	0.894772	33.858	3.41174
267	14.5016	21.6671	18.0844	0.246154	1.1729	14.5016	1.88643	1.04445	2.16174	2.43215	1.03264	3.06083	2.31975	-30.4735	27.3425	4.06515	6.22531	4.23698	3.20128	1.60973	2.43421	3.35548	1.34632	4.8992	1.48098	2.95226	81.9769	76.7185	79.3477	2.72097	5.71169	5.30475	6.01873	6.08571	5.63439	0.891423	7.10484	6.22531	4.28143	989.123	1079.53	1092.25	767.017	834.963	0.94798	0.9588	0.94091	44.1913	4.62091
268	14.7016	22.2671	18.4844	0.272821	1.4029	14.7016	2.16827	1.71111	2.49508	2.43215	1.03264	3.56196	2.31464	-30.0825	30.6601	4.06515	5.22531	3.40364	3.60166	1.94306	2.26754	3.60548	1.01299	4.8992	2.84955	4.04902	82.3103	76.3185	79.3144	2.8543	6.67305	6.80475	6.43834	6.2477	6.30106	0.6895	6.74786	5.22531	4.37025	914.714	1011	967.453	730.493	767.04	0.938321	0.9588	0.917841	44.5246	4.2941
269	15.535	21.3004	18.4177	0.512821	1.1229	15.535	2.04716	1.04445	3.16174	2.76549	1.03264	3.07233	2.35245	-30.4145	29.1065	4.39848	5.55865	3.57031	3.24767	1.94306	1.93421	3.52215	1.01299	4.06586	1.95553	3.81068	80.8769	77.1519	79.0144	2.78763	6.42284	6.30475	6.44815	6.12797	5.63439	1.74808	7.1553	5.55865	4.51953	1062.51	1165.7	1195.15	842.755	863.219	0.953089	0.9588	0.948489	39.5246	3.71794
27	17.0683	23.4004	20.2344	0.489488	1.32957	17.0683	1.69863	1.04445	2.16174	2.09882	1.03264	2.76527	1.30954	-30.2825	31.9778	4.06515	5.89198	3.90364	4.4306	2.27639	2.43421	4.18881	3.01299	5.56586	5.05145	4.47912	83.1769	74.5852	78.8811	3.72097	6.21774	6.13808	6.19128	3.81441	3.30106	0.0328672	NA	5.89198	5.34795	1115.46	1174.26	1258.95	889.61	956.011	0.928661	0.9588	0.894772	34.5246	2.96729
270	16.3016	21.7004	19.001	0.439488	1.3029	16.3016	3.17216	1.37778	5.82841	2.76549	1.1993	6.07233	4.68578	-30.658	27.1065	4.06515	5.55865	3.40364	3.27148	1.94306	2.10088	3.68881	1.01299	4.56586	1.6222	3.31068	83.5769	73.4852	78.5311	2.92097	6.67284	6.63808	6.61482	6.62827	6.30106	2.73497	7.11697	5.55865	4.74175	1089.94	1163.26	1236.92	862.132	914.239	0.953089	0.9588	0.948489	38.858	3.82905
271	15.4016	23.1004	19.251	0.449488	1.9029	15.4016	2.3832	1.21111	4.49508	4.09882	1.03264	2.91561	2.31975	-30.2225	26.6758	3.73182	4.89198	4.07031	3.86795	2.27639	3.26754	4.18881	1.34632	4.23253	2.98098	3.95226	81.4103	71.5185	76.4644	3.38763	6.37835	6.30475	6.35206	7.08571	6.96772	3.19652	7.7715	4.89198	4.17032	1072.37	1167.46	1195.15	853.89	890.249	1.19798	0.9588	1.44091	44.1913	3.95424
272	14.8683	21.2671	18.0677	0.492821	1.1729	14.8683	2.10832	1.04445	2.82841	2.76549	1.03264	3.66697	1.92103	-30.3675	27.8143	4.06515	6.55865	4.23698	3.77517	2.27639	2.26754	3.85548	1.01299	5.23253	3.19854	3.90207	79.0769	77.7185	78.3977	3.0543	6.70604	6.47142	6.82654	6.66786	5.30106	1.09618	8.67058	6.55865	4.4719	1035.22	1112.36	1179.35	813.887	853.519	0.937763	0.9588	0.925751	41.858	3.87128
273	14.5016	22.2004	18.351	0.292821	1.4229	14.5016	1.87823	1.21111	2.16174	1.76549	1.1993	3.11306	2.0089	-30.5365	29.0752	4.39848	6.89198	4.57031	3.71508	2.27639	2.26754	3.93881	2.01299	4.8992	2.85933	3.50421	82.6436	71.2852	76.9644	3.32097	6.51223	6.30475	6.62071	3.81441	3.30106	0.403533	NA	6.89198	4.58605	1147.22	1246.53	1280.15	883.002	995.681	0.93377	0.9588	0.902352	33.5246	3.39766
274	16.5016	21.6671	19.0844	0.372821	1.2629	16.5016	2.21765	1.04445	2.82841	2.76549	1.03264	4.40869	2.67557	-30.6775	29.7418	4.39848	5.89198	3.90364	3.19127	1.60973	2.43421	3.43881	1.01299	4.3992	1.35933	3.50421	82.3436	73.4185	77.8811	2.72097	6.34556	5.97142	6.62071	6.53101	5.63439	1.74562	8.13156	5.89198	4.25272	1062.3	1157.76	1172.12	834.285	901.531	0.93377	0.9588	0.902352	45.5246	3.61989
276	15.735	22.9338	19.3344	0.686154	1.51957	15.735	1.84677	1.37778	1.82841	2.09882	1.03264	2.76527	2.30954	-30.5295	29.3111	4.73182	6.22531	4.73698	3.45441	1.94306	2.60088	3.43881	1.01299	4.3992	1.71811	4.64578	79.9103	72.5519	76.2311	2.72097	7.21774	7.30475	7.02461	4.74302	3.63439	-0.409439	6.39087	6.22531	4.7924	1049.02	1148.73	1169.75	817.956	876.611	0.928661	0.9588	0.894772	41.1913	3.85618
277	17.0016	22.8004	19.901	0.542821	1.2729	17.0016	1.79236	1.37778	2.16174	2.09882	1.03264	2.71612	1.61528	-30.28	29.5627	4.06515	5.89198	4.23698	3.98384	2.94306	1.93421	4.35548	1.01299	5.06586	3.37499	4.35726	82.8769	76.0852	79.4811	3.4543	6.21189	6.13808	6.17558	6.03877	5.30106	0.946281	7.36406	5.89198	4.02104	1022.38	1112.36	1126.05	798.801	869.91	0.933212	0.9588	0.910262	43.858	4.08595
278	15.635	21.7338	18.6844	0.216154	1.21623	15.635	1.90347	1.21111	1.82841	2.76549	1.03264	2.88279	2.28195	-30.641	27.5627	4.06515	5.89198	3.73698	3.69813	1.60973	2.10088	4.02215	1.01299	4.56586	3.37499	4.02392	83.0103	78.2185	80.6144	3.18763	6.62856	6.30475	6.84224	5.70544	4.96772	0.686392	7.03073	5.89198	4.13215	1028.67	1112.36	1130.09	816.501	873.343	0.933212	0.9588	0.910262	47.858	4.97484
279	14.3016	21.9338	18.1177	0.339488	1.37957	14.3016	1.92407	1.71111	2.16174	1.43215	1.03264	3.40718	2.01401	-30.477	29.7575	4.73182	5.22531	3.90364	3.38614	1.60973	2.10088	3.52215	1.01299	4.3992	1.99076	4.40745	81.3103	72.7185	77.0144	2.78763	6.8842	6.97142	6.7011	5.78996	5.96772	1.46266	6.13165	5.22531	4.1639	1009.5	1087.46	1102.69	811.872	852.633	1.19343	0.9588	1.42542	45.1913	4.0578
28	15.335	21.1338	18.2344	0.519488	1.0829	15.335	1.43937	1.04445	2.16174	1.43215	1.03264	1.93194	1.30954	-30.3965	27.9778	5.06515	6.55865	3.73698	3.35917	1.94306	2.43421	3.35548	1.01299	4.73253	2.38478	3.31245	80.9103	73.5852	77.2477	2.6543	6.05108	5.80475	6.19128	3.81441	3.30106	0.422282	NA	6.55865	4.45907	1148.82	1261.83	1300.45	889.61	960.384	0.928661	0.9588	0.894772	38.5246	3.63396
280	16.935	22.5338	19.7344	0.566154	1.3029	16.935	1.7185	1.21111	2.16174	1.43215	1.03264	2.70738	2.0089	-30.208	26.4085	4.39848	5.89198	4.73698	3.38175	1.94306	2.26754	3.68881	1.01299	5.06586	1.526	3.50421	81.5769	76.6519	79.1144	2.92097	6.59556	6.63808	6.45404	3.48107	2.96772	-0.752162	NA	5.89198	4.69716	1076.77	1151.8	1236.92	803.325	931.527	0.93377	0.9588	0.902352	41.858	2.731
281	15.735	22.2671	19.001	0.292821	1.1429	15.735	2.34792	1.37778	2.82841	1.76549	1.1993	4.21612	2.94861	-30.605	28.2294	4.39848	6.22531	3.73698	3.1267	1.94306	1.76754	3.52215	1.01299	4.56586	1.37499	3.19059	81.1769	78.2852	79.7311	2.78763	6.62856	6.47142	6.67558	5.53877	4.63439	0.155938	7.03073	6.22531	4.79882	1011.78	1054.63	1185.55	788.888	835.677	0.933212	0.9588	0.910262	40.1913	3.86373
282	19.0683	22.7338	20.901	0.719488	1.23957	19.0683	2.003	1.04445	2.82841	3.09882	1.03264	2.79673	2.31464	-30.8315	29.3268	4.73182	5.89198	5.07031	3.12546	1.60973	2.10088	3.35548	1.01299	4.73253	1.68288	2.88235	81.9103	75.1519	78.5311	2.6543	5.83971	5.97142	5.605	6.2477	4.63439	0.477596	8.41452	5.89198	3.03692	1039.34	1120.3	1163.55	820.493	870.14	0.938321	0.9588	0.917841	45.858	3.62743
283	17.2683	23.2671	20.2677	0.672821	1.62623	17.2683	2.88253	1.21111	4.82841	3.43215	1.03264	4.97026	3.64798	-29.835	29.9934	4.39848	5.22531	3.73698	3.2207	1.60973	2.43421	3.35548	1.01299	4.73253	1.18288	3.71569	81.3103	73.5185	77.4144	2.6543	6.75638	6.30475	7.105	6.0686	5.96772	2.91254	5.98044	5.22531	4.81469	1133.71	1246.53	1300.45	871.82	933.167	0.938321	0.9588	0.917841	39.1913	2.84965
284	17.4683	22.5671	20.0177	0.626154	1.36957	17.4683	1.7238	1.21111	2.16174	1.76549	1.03264	2.49047	2.0089	-30.498	29.7418	4.39848	6.22531	3.23698	3.64365	2.27639	2.10088	4.27215	1.67966	4.73253	1.526	4.17088	81.0769	73.4852	77.2811	3.52097	7.01223	6.97142	6.95404	5.71395	5.63439	1.51187	6.08892	6.22531	4.58605	1042.27	1139.03	1172.12	821.948	852.501	0.93377	0.9588	0.902352	43.5246	3.06433
285	16.935	22.8338	19.8844	0.386154	1.27623	16.935	1.90703	1.21111	2.16174	2.43215	1.03264	2.63569	2.67557	-30.1675	31.7418	4.06515	5.55865	3.73698	3.33413	1.94306	1.76754	3.52215	1.01299	5.06586	2.526	3.00421	81.9436	73.4519	77.6977	2.78763	5.76223	5.80475	5.62071	5.95195	4.96772	1.01064	7.44133	5.55865	4.0305	1056.45	1165.7	1179.35	834.285	862.954	1.10044	1.29213	0.902352	44.1913	3.61989
286	14.9144	22.8566	18.8855	0.378892	1.62329	14.9144	1.29383	1.00931	1.50343	0.882568	0.965683	2.07351	1.09815	-30.7445	28.2208	4.92694	5.12198	4.56261	3.17183	2.15002	2.16898	3.68525	0.970106	4.40011	1.9302	2.31605	82.1321	72.2645	77.1983	2.90954	7.6896	7.66688	7.6102	6.42123	6.30106	1.3376	7.03227	5.12198	4.96571	970.235	1046.06	1027.55	781.265	842.415	1.03011	1.02844	1.02164	50.0146	4.69775
288	16.7984	22.4531	19.6258	0.620478	1.52433	16.7984	2.2656	1.20178	3.03481	3.36422	0.953526	3.0265	3.57935	-30.4875	27.7557	4.85874	5.86814	4.34075	3.22833	1.39997	2.30952	3.20264	1.00624	4.95444	1.79072	3.47794	81.1289	69.7601	75.4445	2.53068	6.33562	6.30713	6.26109	6.53176	6.63439	2.70038	6.98265	5.86814	3.93797	1058.42	1170.26	1195.15	820.493	864.913	1.14364	1.15988	1.1274	41.2418	3.23281
289	15.765	21.5531	18.6591	0.463812	1.51433	15.765	2.29055	1.20178	3.36814	3.69755	0.953526	2.31578	4.57424	-30.2	23.0733	4.52541	5.20147	4.00742	3.29537	1.73331	2.47618	3.70264	1.00624	4.6211	1.65929	3.0747	81.7622	71.4934	76.6278	2.93068	6.63031	6.80713	6.34737	7.02709	6.63439	1.61788	7.959	5.20147	4.47123	965.689	1042.73	1063.99	747.73	825.297	1.05065	0.993211	1.10433	42.9085	3.35045
29	17.6523	22.4565	20.0544	0.464475	0.906147	17.6523	1.42797	1.0778	2.30002	0.987727	1.04815	1.9313	1.38614	-30.236	30.1621	5.14917	5.78456	3.22349	3.38234	1.84028	1.75396	3.83997	1.01067	4.41293	2.01956	3.92757	80.9621	72.6902	76.8262	3.04143	5.6003	6.03748	5.06101	3.96075	2.30106	-1.6743	6.68446	5.78456	4.9523	1054.88	1134.26	1156.32	832.025	913.278	0.942845	1.01955	0.855999	37.0638	3.20668
290	16.8984	22.0198	19.4591	0.683812	1.50099	16.8984	2.69795	1.20178	4.36814	4.03088	0.953526	3.14911	5.24091	-30.3525	25.74	4.52541	5.20147	4.00742	3.03346	1.39997	2.30952	3.28597	1.00624	4.6211	1.32596	2.74137	81.9289	71.9934	76.9612	2.59734	6.63031	6.80713	6.34737	6.43982	6.30106	2.1808	6.95469	5.20147	4.47123	1042.47	1115.33	1156.32	823.683	891.527	1.05065	0.993211	1.10433	43.5752	3.01712
291	16.3317	23.0198	19.6758	0.533812	1.53766	16.3317	1.86057	1.20178	1.70147	2.69755	1.12019	2.28549	2.94027	-30.669	21.5041	4.52541	5.86814	5.00742	3.43699	2.06664	2.30952	3.8693	1.00624	5.1211	1.96717	2.93313	81.1622	70.2601	75.7112	3.06401	6.25813	6.80713	5.61013	6.40268	5.96772	1.74518	7.34279	5.86814	4.48711	1033.71	1115.33	1156.32	821.948	857.727	1.05575	0.993211	1.11191	39.5752	3.66971
295	16.1317	21.6531	18.8924	0.500478	1.44433	16.1317	2.56947	1.03511	4.36814	3.69755	1.12019	3.4333	3.87999	-30.5585	25.9916	4.19207	5.53481	3.50742	3.25337	1.06664	2.47618	3.45264	1.00624	4.95444	1.6495	3.28618	82.0289	73.5601	77.7945	2.73068	6.37446	6.30713	6.33167	7.15617	6.96772	2.29104	7.93219	5.53481	4.14431	994.801	1091.13	1074.42	794.615	836.657	1.0552	0.993211	1.11982	48.2418	3.69133
296	15.565	21.1865	18.3758	0.487145	1.42099	15.565	2.66684	1.53511	4.03481	4.69755	0.953526	3.67809	2.94027	-30.3915	27.5041	4.52541	5.53481	3.34075	3.27033	2.06664	2.14285	3.53597	1.00624	4.78777	2.13384	2.76647	81.4956	73.4934	77.4945	2.79734	6.09147	6.30713	5.7768	7.56935	7.96772	3.11175	7.67613	5.53481	4.59822	979.442	1066.93	1083.79	766.722	816.831	1.05575	0.993211	1.11191	46.9085	4.11415
297	15.465	21.1865	18.3258	0.387145	1.35766	15.465	2.4763	1.53511	3.03481	3.36422	0.953526	4.07777	3.25113	-30.1895	27.7714	4.85874	5.20147	3.67409	3.28033	1.73331	2.30952	3.8693	1.00624	4.45444	1.92216	2.71451	82.0289	73.5601	77.7945	3.06401	6.37425	6.4738	6.17482	7.20311	6.96772	2.68628	8.0063	5.20147	4.62693	1028.66	1115.33	1147.75	824.19	844.639	1.06996	0.993211	1.15047	49.2418	3.78184
298	15.8317	21.5531	18.6924	0.637145	1.58099	15.8317	2.25579	1.03511	2.36814	4.36422	0.953526	2.88414	3.8524	-30.273	28.2433	4.19207	5.20147	3.34075	3.25899	2.39997	2.64285	3.6193	1.00624	4.28777	1.63972	2.83099	81.6622	73.9601	77.8112	2.86401	6.61861	6.14046	6.98263	7.11859	7.30106	2.93578	7.57204	5.20147	4.59518	1021.48	1115.33	1140.52	789.813	858.496	1.05975	0.993211	1.13531	44.9085	4.03221
3	15.735	22.1004	18.9177	0.529488	1.29623	15.735	2.4038	1.37778	2.16174	3.76549	1.03264	3.99047	3.34223	-30.445	27.0752	4.39848	4.89198	3.07031	2.97699	1.27639	1.93421	3.27215	1.01299	4.3992	1.35933	3.00421	80.8436	73.4852	77.1644	2.58763	6.26223	6.30475	6.12071	6.95195	6.63439	0.937292	7.77467	4.89198	3.47494	907.386	1011	967.453	717.748	749.844	0.93377	0.9588	0.902352	51.1913	4.50877
30	16.0856	22.4898	19.2877	0.264475	0.992814	16.0856	1.38649	1.0778	1.96668	1.65439	1.04815	1.52139	1.33608	-30.171	30.681	4.48251	6.1179	4.39015	3.08844	1.50695	2.25396	3.50663	1.01067	4.41293	0.964761	3.25375	82.5954	74.0902	78.3428	2.77476	5.29391	5.37082	5.10998	NA	NA	NA	NA	6.1179	5.32077	1331.59	1378.64	1572.12	1086.88	1077.19	0.961606	1.01955	0.910046	NA	2.32635
300	17.0317	22.5198	19.7758	0.620478	1.52766	17.0317	2.21506	1.36844	2.36814	3.69755	1.28686	2.6515	2.94538	-30.7335	24.8531	4.19207	5.20147	4.50742	3.36995	2.06664	2.30952	3.78597	1.00624	4.78777	1.59861	3.33637	81.2622	72.7601	77.0112	2.99734	6.3801	6.4738	6.19052	7.57402	7.63439	1.92656	8.03311	5.20147	3.95385	906.467	1034.16	976.853	693.705	737.787	1.06541	0.993211	1.13498	49.5752	4.10763
301	16.565	21.4865	19.0258	0.517145	1.54766	16.565	2.20824	1.36844	3.03481	4.36422	0.953526	2.56306	2.55176	-30.445	26.0073	4.19207	5.86814	4.00742	3.23395	1.73331	2.47618	3.78597	1.00624	4.6211	1.78094	2.35608	82.2622	71.1934	76.7278	2.99734	6.9131	6.4738	7.24539	6.66085	6.96772	1.15284	6.95584	5.86814	4.0555	897.295	1017.03	967.453	687.638	734.816	1.06486	0.993211	1.14289	42.9085	3.90703
302	14.7984	21.6198	18.2091	0.373812	1.37433	14.7984	1.88314	1.03511	1.70147	3.03088	0.953526	3.31578	1.57424	-30.315	23.74	4.52541	5.20147	3.17409	3.29537	1.73331	2.64285	3.8693	1.00624	4.45444	1.65929	2.74137	81.2622	71.8934	76.5778	3.06401	6.29698	6.4738	6.01404	7.19375	6.96772	1.48663	7.959	5.20147	4.1379	925.89	1034.16	997.353	737.36	751.671	1.05065	0.993211	1.10433	47.9085	4.12823
303	16.2317	20.1198	18.1758	0.417145	1.21766	16.2317	2.51719	1.36844	3.03481	4.03088	0.953526	3.58334	3.91779	-30.276	25.7714	4.52541	5.20147	4.34075	3.73272	2.06664	2.64285	3.8693	1.00624	5.1211	2.42216	4.21451	83.2289	73.2267	78.2278	3.06401	6.29092	6.14046	6.34148	7.03644	7.30106	1.54675	7.33963	5.20147	3.96026	902.485	1034.16	967.453	692.227	733.366	2.31996	1.82654	2.81714	49.5752	3.89295
304	16.065	21.6531	18.8591	0.423812	1.44766	16.065	2.61654	1.53511	3.70147	5.03088	1.12019	2.91074	3.27871	-30.1055	23.5198	4.19207	5.20147	4.50742	3.36995	2.39997	2.47618	3.70264	1.00624	5.1211	1.59861	2.83637	82.0622	70.0601	76.0612	2.93068	6.46344	6.4738	6.35719	7.57402	7.63439	1.948	8.03311	5.20147	4.06496	908.303	1034.16	995.053	682.852	737.787	1.06541	0.993211	1.13498	48.2418	4.32985
305	15.2317	22.4198	18.8258	0.547145	1.58766	15.2317	2.33654	1.03511	4.36814	3.36422	1.12019	2.16074	3.94538	-30.515	25.5198	4.52541	5.20147	4.34075	3.17948	1.39997	2.14285	3.45264	1.00624	5.1211	1.76527	2.6697	83.0956	69.3934	76.2445	2.73068	6.8801	6.80713	6.85719	6.08422	4.96772	1.94366	8.94074	5.20147	4.62051	1136.38	1252.13	1320.75	851.395	937.867	1.06541	0.993211	1.13498	31.2418	2.8854
306	17.065	22.2198	19.6424	0.513812	1.43433	17.065	2.13217	1.03511	3.70147	4.03088	0.953526	2.16752	2.8851	-30.632	26.0073	4.52541	5.20147	3.67409	3.28157	1.39997	2.47618	3.70264	1.00624	5.28777	1.4476	2.68942	81.9956	73.2267	77.6112	2.93068	5.99643	6.80713	5.07872	6.66085	6.96772	3.15551	6.95584	5.20147	4.16661	1068.86	1197.73	1195.15	808.228	892.076	1.06486	0.993211	1.14289	47.9085	3.57369
307	16.365	22.3531	19.3591	0.470478	1.59099	16.365	2.1488	1.36844	2.70147	3.03088	0.953526	3.01911	2.91268	-30.6615	23.7557	4.52541	5.53481	3.84075	3.49023	2.06664	2.80952	4.03597	1.00624	4.45444	1.79072	3.31127	81.6956	68.9601	75.3278	3.19734	6.58562	6.9738	6.09443	6.53176	6.63439	2.36508	6.98265	5.53481	4.2713	1029.7	1115.33	1122.85	832.83	864.913	1.06031	0.993211	1.1274	44.5752	3.56615
308	15.5984	21.9865	18.7924	0.443812	1.53433	15.5984	2.82363	1.53511	5.70147	3.36422	1.45353	3.56306	3.21843	-30.249	28.0073	4.85874	5.20147	4.50742	3.01966	1.73331	2.30952	3.53597	1.00624	4.45444	1.28094	2.18942	80.4956	70.1267	75.3112	2.79734	6.57977	6.4738	6.57872	7.16085	7.63439	3.67551	7.28917	5.20147	4.27772	1056.29	1151.9	1192.79	831.375	866.873	1.06486	0.993211	1.14289	42.9085	3.35147
309	15.365	20.5531	17.9591	0.560478	1.27766	15.365	2.17506	1.03511	3.70147	3.36422	0.953526	2.9015	2.61205	-30.0915	27.5198	4.85874	5.20147	4.67409	2.91757	1.39997	2.47618	3.03597	1.00624	4.78777	1.26527	2.1697	81.4289	74.2934	77.8612	2.39734	6.29677	7.4738	5.02386	6.69053	6.30106	2.69179	7.53038	5.20147	4.28718	1086.24	1180.86	1222.02	851.395	907.337	1.06541	0.993211	1.13498	39.2418	3.32985
31	15.7016	20.6671	18.1844	0.456154	1.2629	15.7016	2.04827	1.71111	2.16174	2.76549	1.03264	3.31196	1.64798	-30.6935	29.9934	5.06515	6.22531	3.90364	3.55404	1.60973	3.10088	3.77215	1.01299	4.73253	1.51621	4.21569	79.3436	72.7185	76.0311	2.98763	6.25638	6.13808	6.27167	6.41437	5.96772	-1.7538	7.41452	6.22531	4.70358	733.959	794.432	760.787	615.517	582.233	3.85499	1.79213	5.91784	51.858	5.62743
310	16.165	22.0531	19.1091	0.560478	1.41766	16.165	2.40141	1.53511	4.36814	3.36422	0.953526	2.96752	2.8851	-30.0255	23.3407	3.85874	4.86814	3.67409	3.04347	1.39997	2.14285	3.28597	1.00624	4.95444	1.28094	2.68942	81.3289	72.9267	77.1278	2.59734	6.4131	6.64046	6.07872	7.32751	7.63439	3.93043	7.6225	4.86814	4.16661	1078.13	1179.36	1222.02	836.825	892.076	1.06486	0.993211	1.14289	40.5752	3.35147
311	15.1984	20.7198	17.9591	0.447145	1.29099	15.1984	2.09286	1.20178	2.70147	3.03088	1.28686	2.96306	2.21843	-30.121	30.0073	4.19207	5.20147	4.17409	3.30538	2.06664	2.30952	3.6193	1.33957	4.95444	1.9476	2.52275	82.2289	74.4267	78.3278	2.93068	6.49643	6.64046	6.24539	6.81495	6.63439	3.31136	7.41397	5.20147	4.72216	1110.76	1229.53	1265.25	836.825	929.209	1.06486	0.993211	1.14289	38.5752	3.24036
312	14.9317	21.2531	18.0924	0.447145	1.40766	14.9317	2.15022	1.70178	3.03481	3.03088	0.953526	2.4265	2.91268	-30.4425	25.7557	4.19207	5.53481	3.67409	3.27595	2.06664	2.30952	3.78597	1.00624	4.78777	1.79072	2.47794	82.8622	72.8934	77.8778	2.99734	6.83562	6.80713	6.76109	6.83338	6.63439	2.85524	7.03958	5.53481	4.38241	1071.69	1170.26	1192.79	838.28	902.56	1.06031	0.993211	1.1274	43.2418	3.23281
313	15.465	21.8865	18.6758	0.450478	1.46433	15.465	2.36294	1.36844	3.36814	4.03088	0.953526	2.96752	3.21843	-30.0055	30.0073	4.19207	5.20147	4.17409	3.47204	2.73331	2.47618	3.95264	1.00624	4.28777	1.9476	3.35608	81.9622	73.3934	77.6778	3.13068	6.4131	6.80713	5.91205	6.49418	6.30106	2.18304	7.28917	5.20147	4.38883	1042.66	1124.43	1140.52	831.375	892.076	1.14819	0.993211	1.30956	41.9085	3.46258
314	15.3317	22.1198	18.7258	0.443812	1.65766	15.3317	2.43869	1.53511	3.70147	3.36422	0.953526	3.31578	3.24091	-30.4585	27.74	4.85874	5.20147	3.84075	3.29537	2.06664	2.30952	3.78597	1.00624	4.95444	1.65929	2.5747	82.3956	71.6267	77.0112	2.99734	6.54698	6.64046	6.34737	7.02709	6.63439	2.54576	7.959	5.20147	4.47123	1045.18	1124.43	1179.35	829.133	864.781	1.05065	0.993211	1.10433	44.2418	3.46156
315	16.6016	23.1004	19.851	0.592821	1.31957	16.6016	1.92099	1.21111	2.49508	2.09882	1.03264	2.77026	2.64798	-30.1705	27.3268	4.06515	5.55865	3.90364	3.00642	1.94306	2.10088	2.93881	1.01299	4.23253	1.34955	3.54902	81.5103	74.2852	77.8977	2.32097	6.17305	6.13808	6.105	5.2477	3.96772	-0.46193	7.08119	5.55865	4.70358	1015.96	1079.53	1161.69	794.983	844.783	0.938321	0.9588	0.917841	42.1913	3.2941
316	16.135	22.8671	19.501	0.506154	1.29957	16.135	1.59074	1.04445	2.49508	1.09882	1.03264	2.40718	1.68067	-30.2895	29.0908	4.06515	6.22531	5.07031	3.45757	1.60973	2.10088	3.60548	1.01299	4.8992	2.65743	3.57411	82.9436	75.1852	79.0644	2.8543	5.80087	5.63808	5.86777	3.48107	2.96772	-0.815205	NA	6.22531	4.83057	1071.37	1112.36	1223.49	845.945	920.313	0.943429	0.9588	0.92542	40.1913	3.39114
317	17.2016	21.6338	19.4177	0.532821	1.14957	17.2016	1.99492	1.04445	2.82841	2.43215	1.03264	2.93194	2.64287	-30.3515	27.3111	4.39848	5.55865	4.57031	3.21632	1.27639	2.26754	3.52215	1.01299	4.3992	1.88478	3.31245	80.8103	73.5519	77.1811	2.78763	6.71774	6.63808	6.69128	5.57636	4.30106	-0.305456	7.39087	5.55865	4.68129	1000.81	1104.43	1122.85	785.256	807.697	1.17866	0.9588	1.39477	45.858	4.85618
318	16.6016	21.6671	19.1344	0.529488	1.10623	16.6016	1.74672	1.04445	2.49508	2.09882	1.03264	2.62924	1.67557	-30.9025	29.7418	3.73182	5.89198	4.23698	3.38175	1.94306	1.93421	3.60548	1.01299	5.23253	1.85933	3.50421	81.2436	76.1519	78.6977	2.8543	5.9289	5.80475	5.95404	5.78528	4.63439	-0.17346	7.44133	5.89198	4.14161	983.565	1063.33	1079.32	770.262	837.847	0.93377	0.9588	0.902352	41.858	3.39766
319	16.1683	21.8671	19.0177	0.322821	1.07623	16.1683	1.5898	1.04445	2.16174	2.09882	1.03264	2.33363	1.25436	-30.2255	27.8143	4.39848	5.89198	3.90364	3.48946	1.94306	2.10088	3.68881	1.67966	5.3992	2.53188	2.7354	81.1769	77.6519	79.4144	3.0543	6.45604	6.80475	5.9932	5.83452	4.63439	-0.422254	7.67058	5.89198	4.24968	962.251	1029.73	1081.82	758.853	796.846	0.937763	0.9588	0.925751	43.5246	3.87128
32	14.8189	21.2898	18.0544	0.381142	1.19615	14.8189	1.65863	1.0778	2.30002	1.32106	1.04815	3.1235	1.40147	-30.4835	30.2091	4.14917	5.78456	4.72349	3.32407	1.17362	2.75396	3.25663	1.01067	4.74626	1.7472	3.97061	80.4621	69.0902	74.7762	2.57476	5.54955	5.37082	5.63551	2.81441	2.30106	-0.875694	NA	5.78456	5.1303	1123.3	1208.33	1280.15	861.682	959.803	0.971823	1.01955	0.925205	33.0638	2.74265
320	16.835	23.8338	20.3344	0.536154	1.40957	16.835	1.85092	1.21111	2.16174	2.43215	1.03264	2.79763	1.9762	-30.5385	26.6444	4.73182	5.89198	3.57031	3.21632	1.94306	2.10088	3.68881	1.01299	4.8992	1.21811	2.97912	81.4436	72.2519	76.8477	2.92097	6.55108	6.63808	6.35795	6.57636	6.63439	0.798143	7.05754	5.89198	4.12573	895.465	986.432	939.253	733.683	739.481	1.42866	0.9588	1.89477	48.1913	4.41174
321	17.7016	23.4671	20.5844	0.769488	1.3629	17.7016	1.72868	1.04445	2.49508	1.76549	1.03264	2.77026	1.64798	-30.8275	26.6601	4.73182	5.55865	4.23698	3.4588	1.94306	2.26754	3.60548	1.01299	4.73253	2.34955	3.71569	81.5436	74.2852	77.9144	2.8543	6.33971	6.30475	6.27167	3.56488	2.63439	-0.45943	5.96559	5.55865	4.59247	1130.4	1246.53	1320.75	838.28	933.167	0.938321	0.9588	0.917841	35.858	2.96077
322	15.7016	22.1004	18.901	0.416154	1.25957	15.7016	1.65176	1.04445	2.49508	1.76549	1.03264	2.37026	1.64798	-30.3	29.3268	4.39848	6.55865	4.73698	3.50642	1.60973	2.10088	3.43881	1.34632	5.06586	2.51621	4.04902	79.9769	75.1852	77.5811	2.78763	6.33971	6.30475	6.27167	4.58103	3.63439	-1.20464	6.08119	6.55865	4.37025	980.894	1063.33	1094.59	768.807	813.98	1.02165	0.9588	1.08451	42.5246	3.40521
323	14.9016	21.4671	18.1844	0.259488	1.2329	14.9016	2.14535	1.21111	2.16174	2.43215	1.03264	4.16697	1.92103	-30.4985	24.481	4.06515	6.55865	4.57031	3.17993	1.60973	2.43421	3.43881	1.01299	4.06586	1.86521	3.2354	82.9436	73.9519	78.4477	2.72097	6.20604	5.80475	6.4932	5.00119	3.30106	-0.769296	7.33725	6.55865	4.36079	1046.74	1106.2	1222.02	803.077	873.926	0.937763	0.9588	0.925751	41.1913	3.53794
324	16.2683	23.1004	19.6844	0.389488	1.23623	16.2683	1.66788	1.21111	2.16174	1.76549	1.03264	2.65408	1.31464	-30.287	27.9934	4.06515	5.55865	4.07031	3.31594	1.60973	1.93421	3.77215	1.34632	4.3992	1.68288	3.71569	81.6436	73.8852	77.7644	3.0543	6.58971	6.30475	6.77167	5.7477	4.63439	-0.508316	7.41452	5.55865	3.9258	954.879	1029.73	1046.15	761.92	798.84	0.938321	0.9588	0.917841	45.858	4.07188
326	15.665	23.6531	19.6591	0.520478	1.68433	15.665	2.15902	1.03511	2.03481	4.03088	1.28686	2.58447	3.24602	-30.341	23.7557	4.19207	5.20147	3.50742	3.49023	2.06664	2.14285	3.8693	1.00624	5.1211	1.95739	3.47794	80.8622	70.7934	75.8278	3.06401	6.83562	7.14046	6.42776	7.8651	7.96772	2.30342	8.31598	5.20147	4.16019	910.195	1034.16	951.553	727.147	745.047	1.14364	1.15988	1.1274	40.2418	2.78837
327	14.6317	22.5531	18.5924	0.423812	1.72433	14.6317	2.09595	1.20178	2.36814	4.69755	1.12019	1.90707	2.61205	-30.473	22.8531	4.19207	5.86814	4.50742	3.70329	2.73331	2.64285	4.03597	1.00624	4.1211	2.76527	4.00304	80.9956	70.3267	75.6612	3.19734	6.71344	6.4738	6.85719	7.07402	6.96772	2.17497	7.69978	5.86814	4.06496	984.858	1066.93	1080.59	801.909	806.65	1.06541	0.993211	1.13498	41.5752	3.10763
328	14.7984	20.5865	17.6924	0.413812	1.32099	14.7984	1.82306	1.36844	1.70147	3.36422	0.953526	2.16012	2.21843	-30.342	25.3407	4.52541	5.20147	3.84075	3.32919	2.06664	2.47618	3.70264	1.00624	4.78777	1.78094	2.85608	79.6956	72.4601	76.0778	2.93068	6.57977	6.30713	6.74539	6.66085	6.96772	-0.921846	6.95584	5.20147	4.61105	719.563	807.732	717.353	608.068	562.859	1.39819	1.32654	1.47622	47.2418	4.90703
329	18.0984	22.7198	20.4091	0.597145	1.55099	18.0984	1.97656	1.53511	2.03481	3.36422	1.12019	1.94794	2.28382	-30.412	22.8688	4.52541	5.53481	3.17409	3.23148	1.73331	1.97618	3.3693	1.00624	5.1211	1.73004	3.23961	79.1289	73.0601	76.0945	2.66401	6.75208	6.64046	6.77091	7.74537	8.30106	1.00901	7.72342	5.53481	3.97614	770.751	829.432	806.487	635.105	628.766	1.15841	1.15988	1.15805	50.2418	5.43443
33	15.8856	21.6565	18.771	0.521142	1.07615	15.8856	1.38264	1.3142	1.96668	1.32106	1.04815	1.59797	1.38614	-30.4505	30.1621	4.48251	6.45123	5.55682	3.21567	1.17362	2.42063	3.25663	1.01067	5.24626	1.51956	3.2609	80.5621	67.8236	74.1928	2.57476	5.01697	5.37082	4.56101	4.26382	1.65245	-0.794994	7.36174	6.45123	5.06342	1185.77	1251.2	1380.05	911.658	1016.54	0.942845	1.01955	0.855999	32.0481	2.98445
330	14.6984	20.8531	17.7758	0.487145	1.43433	14.6984	1.90317	1.86844	2.03481	3.36422	1.28686	1.76843	1.54665	-30.1265	25.9916	4.19207	5.86814	4.50742	3.37242	2.06664	2.14285	3.95264	1.00624	4.78777	2.31617	2.45285	79.7622	73.7267	76.7445	3.13068	6.62446	6.14046	6.99833	7.4895	7.96772	1.2601	7.59886	5.86814	4.14431	820.817	921.098	850.353	660.155	669.28	1.0552	0.993211	1.11982	47.9085	4.69133
333	15.9317	21.9198	18.9258	0.477145	1.67099	15.9317	1.91777	1.03511	2.03481	3.69755	0.953526	1.83701	3.25113	-30.2115	25.7714	4.52541	6.20147	4.00742	3.85176	3.06664	2.30952	4.45264	1.00624	5.28777	2.08882	3.88118	82.9289	74.1267	78.5278	3.53068	6.45759	6.64046	6.17482	7.70311	7.63439	1.75409	8.33963	6.20147	4.07137	891.691	1017.03	947.187	681.397	738.423	1.1533	1.15988	1.15047	47.2418	3.78184
335	15.8984	21.8531	18.8758	0.613812	1.52099	15.8984	1.97506	1.36844	2.36814	3.03088	0.953526	2.4015	2.61205	-30.5545	24.1864	4.52541	5.86814	3.50742	3.39376	1.73331	2.47618	3.78597	1.00624	4.78777	1.93194	3.1697	80.9622	71.4601	76.2112	2.99734	7.04677	6.9738	7.02386	6.57402	6.63439	1.47836	7.03311	5.86814	4.17607	953.737	1042.73	1040.49	736.112	812.263	1.06541	0.993211	1.13498	48.2418	4.44096
336	15.065	22.8865	18.9758	0.443812	1.53099	15.065	1.86576	1.36844	2.36814	3.36422	1.12019	2.4333	1.21332	-30.088	23.9916	4.19207	5.86814	4.17409	3.0867	1.73331	2.47618	3.28597	1.00624	4.95444	1.48284	2.28618	82.7289	71.3601	77.0445	2.59734	5.87446	6.30713	5.33167	6.65617	5.96772	1.5444	7.93219	5.86814	4.58876	1016.51	1099.43	1122.85	794.615	866.74	1.0552	0.993211	1.11982	46.2418	3.24689
337	16.065	22.2531	19.1591	0.393812	1.47099	16.065	1.53398	1.20178	1.70147	2.03088	0.953526	1.82205	1.91268	-30.062	27.089	4.19207	4.86814	3.67409	3.03785	1.73331	2.30952	3.20264	1.00624	4.45444	1.45739	2.81127	82.7956	72.8934	77.8445	2.53068	6.58562	6.30713	6.76109	6.3651	6.30106	1.03815	6.98265	4.86814	4.38241	944.581	1034.16	1006.75	741.193	813.343	1.06031	0.993211	1.1274	45.9085	3.67726
338	15.665	21.6531	18.6591	0.537145	1.34766	15.665	2.03813	1.20178	2.70147	4.03088	0.953526	2.3289	2.24602	-30.541	22.4224	4.19207	5.20147	3.34075	3.25214	2.06664	2.30952	3.3693	1.00624	5.1211	1.79072	2.81127	83.0956	73.3934	78.2445	2.66401	6.25228	6.80713	5.59443	7.69843	7.96772	2.90277	7.98265	5.20147	3.71575	961.539	1042.73	1046.45	765.46	808.643	1.06031	0.993211	1.1274	47.9085	4.45503
339	15.0317	21.4865	18.2591	0.387145	1.37433	15.0317	1.88314	1.03511	3.36814	2.36422	0.953526	2.31578	2.57424	-30.4645	25.74	4.19207	4.86814	4.67409	3.58108	2.73331	2.30952	4.28597	1.00624	4.28777	1.99262	3.5747	81.3956	72.4601	76.9278	3.39734	6.71365	5.9738	7.34737	5.77083	5.30106	2.27835	6.78936	4.86814	4.24901	1136.49	1263.43	1300.45	865.72	933.354	1.05065	0.993211	1.10433	38.9085	3.23934
34	15.8523	21.1232	18.4877	0.224475	1.04948	15.8523	1.99802	1.3142	2.30002	2.98773	1.04815	2.9313	2.05281	-30.62	30.1621	4.81584	6.45123	3.72349	3.38234	1.84028	2.42063	3.6733	1.01067	4.91293	1.51956	3.59424	80.4288	67.4902	73.9595	2.90809	6.26697	6.53748	5.89434	6.52688	6.30106	0.424862	7.24355	6.45123	4.39675	892.043	971.965	951.553	711.301	749.712	0.942845	1.01955	0.855999	44.0638	4.87334
340	16.6317	21.1198	18.8758	0.433812	1.28433	16.6317	2.45835	1.36844	3.70147	3.69755	1.45353	2.76663	3.54665	-30.959	23.325	4.19207	5.20147	4.17409	2.89623	1.39997	1.64285	2.95264	1.00624	4.95444	1.48284	2.61951	80.9956	73.0267	77.0112	2.33068	6.2078	6.14046	6.165	6.4895	6.63439	2.94948	6.93219	5.20147	4.0332	1079.76	1171.6	1192.79	849.415	922.87	1.0552	0.993211	1.11982	42.2418	3.02466
341	15.5984	21.9865	18.7924	0.383812	1.44099	15.5984	2.55961	1.20178	4.70147	4.69755	1.45353	2.58815	2.57935	-30.9035	23.7557	4.19207	5.20147	4.84075	3.37118	2.06664	1.97618	4.03597	1.00624	4.6211	1.79072	3.14461	80.5956	71.3601	75.9778	3.19734	6.16895	6.64046	5.59443	6.53176	6.30106	2.23529	7.31598	5.20147	3.82686	1047.14	1151.9	1156.32	825.943	871.517	1.06031	0.993211	1.1274	47.2418	3.89948
343	15.9984	21.7865	18.8924	0.437145	1.47433	15.9984	2.38099	1.36844	4.03481	4.36422	1.28686	2.2265	2.91268	-30.334	23.7557	3.85874	5.53481	3.84075	3.27595	1.73331	2.14285	3.45264	1.00624	5.1211	1.79072	3.14461	82.3622	70.7934	76.5778	2.73068	6.33562	6.30713	6.26109	6.8651	6.30106	1.78317	7.98265	5.53481	4.04908	1008.41	1083.06	1102.69	820.493	844.507	1.14364	1.15988	1.1274	46.5752	4.01059
344	15.3317	21.9865	18.6591	0.377145	1.49099	15.3317	2.3369	1.53511	4.36814	3.36422	0.953526	2.15263	3.27361	-30.5635	23.5041	4.19207	5.86814	4.50742	3.22271	2.39997	2.30952	3.53597	1.00624	4.45444	1.80051	2.76647	82.2289	74.2267	78.2278	2.79734	6.00813	6.30713	5.61013	7.06006	6.96772	2.73696	7.45418	5.86814	4.59822	1033	1116.36	1122.85	839.735	869.557	1.05575	0.993211	1.11191	45.2418	3.00304
345	15.065	20.8865	17.9758	0.367145	1.41099	15.065	3.18868	1.70178	7.03481	4.69755	1.12019	3.4265	4.24602	-30.229	23.7557	4.19207	5.20147	4.50742	3.13309	1.39997	2.30952	3.53597	1.00624	4.6211	1.62406	2.64461	81.1289	72.3267	76.7278	2.79734	6.25228	6.14046	6.26109	7.03176	6.96772	2.66409	7.64932	5.20147	4.2713	1026.76	1091.13	1140.52	832.83	859.687	1.06031	0.993211	1.1274	46.9085	3.1217
346	15.3984	20.3531	17.8758	0.563812	1.26099	15.3984	2.14936	1.20178	2.70147	4.69755	1.28686	2.42205	1.91268	-30.522	22.4224	3.85874	4.86814	4.50742	3.06166	2.06664	1.80952	3.53597	1.00624	4.28777	1.79072	2.47794	79.7956	73.3934	76.5945	2.79734	6.83562	6.30713	7.26109	6.69843	5.96772	1.45767	7.98265	4.86814	3.49352	1009.08	1115.33	1140.52	772.153	825.43	1.14364	0.993211	1.29407	48.9085	4.78837
347	16.6144	21.9899	19.3022	0.568892	1.68996	16.6144	1.30913	1.17598	1.1701	1.88257	0.965683	1.74438	0.769929	-30.0885	26.2365	4.5936	5.78865	3.72928	4.29527	2.81668	2.83565	5.01858	1.97011	5.23344	2.2283	4.88595	78.9987	69.1645	74.0816	4.17621	7.1449	7.16688	7.02392	8.09258	8.30106	1.32476	8.38925	5.78865	4.43245	797.801	877.432	797.653	641.485	691.134	1.03977	1.02844	1.04471	47.0146	4.469
348	12.9478	19.9233	16.4355	0.495559	1.59996	12.9478	3.29354	2.00931	3.83677	4.2159	1.46568	4.69817	5.40901	-30.5795	25.8215	4.5936	5.45531	5.39595	3.51517	2.15002	2.33565	4.10192	0.970106	4.90011	2.05185	3.09743	81.0654	74.6978	77.8816	3.24287	7.63905	8.16688	7.00821	7.72166	8.30106	3.5427	7.69577	5.45531	4.66109	987.804	1104.43	1081.82	753.473	828.623	1.04432	1.02844	1.0602	50.0146	3.36543
349	15.3811	21.9566	18.6688	0.595559	1.74662	15.3811	2.64682	1.17598	2.1701	4.54923	1.46568	3.85769	4.07057	-30.128	26.4724	4.92694	5.12198	4.22928	3.39174	2.81668	2.16898	3.76858	0.970106	4.73344	1.92042	3.02752	79.4654	68.5312	73.9983	2.97621	6.76708	7.00021	6.42782	7.38365	7.96772	2.79787	7.33879	5.12198	4.30547	952.553	1070.96	1011.35	756.663	788.217	1.03466	1.02844	1.03713	50.348	4.26085
35	15.9683	21.9004	18.9344	0.569488	1.35623	15.9683	2.10603	1.04445	3.16174	3.43215	1.1993	2.76527	2.30954	-30.595	27.3111	4.06515	5.22531	3.57031	3.1687	1.27639	2.10088	3.52215	1.01299	5.06586	1.38478	2.97912	81.5103	74.0519	77.7811	2.78763	6.46774	6.30475	6.52461	5.90969	4.63439	0.0324201	7.72421	5.22531	4.45907	1001.2	1054.63	1185.55	762.73	818.881	0.928661	0.9588	0.894772	40.1913	3.41174
350	15.4144	22.0899	18.7522	0.762226	1.61662	15.4144	2.44493	1.00931	3.83677	3.88257	1.29902	3.2854	3.07567	-30.4645	26.4881	4.26027	5.12198	3.22928	2.84851	2.15002	2.00231	2.60192	0.970106	4.56677	1.88519	2.26409	78.6654	69.7978	74.2316	2.04287	7.63905	7.83354	7.34155	7.88832	8.30106	3.60433	8.0291	5.12198	5.21665	993.084	1104.43	1068.89	776.62	839.53	1.12765	1.02844	1.22687	50.6813	3.0321
351	13.7144	21.1233	17.4188	0.518892	1.44996	13.7144	2.96617	1.17598	4.1701	4.54923	1.46568	3.43067	5.71475	-30.1475	24.4064	4.5936	5.45531	4.39595	3.33032	2.15002	2.33565	3.68525	0.970106	5.06677	1.8754	2.64223	80.7321	71.8645	76.2983	2.90954	6.96653	7.50021	6.32584	7.85074	7.96772	3.33381	8.33563	5.45531	4.44529	998.465	1079.53	1076.92	813.678	841.489	1.21554	1.36177	1.07569	50.6813	3.48409
352	14.9144	22.1233	18.5188	0.815559	1.85996	14.9144	2.27213	1.17598	1.50343	3.54923	1.46568	3.19938	3.74234	-30.128	25.1548	4.26027	5.45531	4.72928	3.53898	1.81668	2.50231	4.18525	0.970106	4.73344	2.21852	3.09743	80.4654	71.9645	76.215	3.30954	6.80572	7.50021	6.00821	7.38832	7.63439	3.28361	7.69577	5.45531	4.88332	1022.72	1079.53	1112.42	825.943	890.117	1.04432	1.02844	1.0602	45.348	3.47655
353	15.0811	20.8899	17.9855	0.548892	1.51996	15.0811	2.40722	1.34264	3.1701	3.88257	1.46568	2.64187	3.70964	-30.426	26.0574	4.26027	4.78865	3.72928	3.30212	2.15002	2.16898	3.68525	0.970106	4.90011	1.91064	2.739	82.1654	70.9645	76.565	2.90954	6.51123	7.16688	5.74545	7.1794	7.63439	3.21054	7.31198	4.78865	5.08966	1016.46	1104.43	1115.62	788.271	875.137	1.03921	1.02844	1.05262	48.0146	3.15729
354	13.1144	19.8566	16.4855	0.438892	1.36329	13.1144	2.32955	1.17598	2.1701	3.2159	1.13235	3.2854	4.40901	-30.274	27.8215	4.26027	4.78865	3.89595	3.39613	2.48335	1.83565	4.01858	0.970106	4.23344	2.05185	3.43076	81.6987	74.4312	78.065	3.17621	7.22238	7.33354	7.00821	7.05499	7.96772	3.73872	6.69577	4.78865	4.99443	1033.15	1104.43	1147.75	814.21	883.347	1.04432	1.02844	1.0602	46.348	3.25432
355	14.4144	20.9233	17.6688	0.505559	1.47662	14.4144	3.14944	1.50931	4.83677	4.54923	1.46568	3.69293	5.41412	-30.1025	26.5038	4.26027	5.12198	3.89595	3.3767	2.15002	2.50231	3.76858	0.970106	4.23344	2.18329	3.16733	81.4321	72.6978	77.065	2.97621	7.09435	7.16688	6.92194	7.393	7.96772	3.71952	7.38609	5.12198	4.7945	1031.51	1104.43	1133.29	840.54	865.046	1.05398	1.02844	1.08327	49.0146	3.2478
356	14.3144	21.2566	17.7855	0.568892	1.55329	14.3144	2.97338	1.05284	4.50343	4.88257	1.46568	3.95051	4.07057	-30.314	25.1391	4.26027	5.12198	4.72928	3.10602	1.15002	1.83565	3.35192	0.970106	4.73344	2.08709	2.86086	81.3654	74.4645	77.915	2.64287	6.85041	7.16688	6.42782	7.71698	7.96772	3.4537	8.00546	5.12198	4.52769	1008.74	1104.43	1102.69	785.26	859.554	1.03466	1.02844	1.03713	49.6813	3.26085
357	15.8478	22.0233	18.9355	0.618892	1.74996	15.8478	2.42697	0.842644	4.50343	3.2159	1.29902	3.35715	3.10326	-29.9015	24.9032	4.92694	5.45531	3.72928	4.27146	2.81668	2.66898	4.76858	2.63677	5.90011	2.39497	4.21929	84.1987	73.3312	78.765	4.10954	7.22823	7.66688	6.69059	6.92591	7.63439	4.20587	6.72258	5.45531	5.32134	1101.73	1224.53	1208.59	858.765	931.527	1.03977	1.02844	1.04471	40.6813	3.58011
358	15.0144	21.8566	18.4355	0.418892	1.70996	15.0144	1.76568	2.00931	2.1701	2.2159	1.13235	1.12444	1.4417	-30.27	26.2522	4.5936	6.12198	4.22928	3.9187	2.81668	2.50231	4.68525	1.30344	4.56677	3.19307	3.28919	80.9987	69.2978	75.1483	3.77621	7.01687	7.16688	6.77098	7.59725	7.96772	1.05795	7.74623	6.12198	4.56586	803.499	881.732	812.087	650.555	686.267	1.04943	1.02844	1.06778	49.6813	4.24025
359	14.0722	21.5233	17.9631	0.620608	1.86996	14.0722	3.185	2.17598	2.50343	5.54923	1.46568	4.80854	3.70964	-29.7455	26.7241	4.5936	5.45531	3.89595	3.70688	3.15002	2.50231	4.26858	0.970106	4.90011	2.0773	3.40566	79.3191	67.4645	73.3918	3.37621	7.34456	7.33354	7.24545	6.51273	6.96772	1.0778	6.64531	5.45531	4.64522	890.866	1011	920.353	715.048	734.683	1.28921	1.02844	1.55262	49.6813	4.82395
36	16.8016	22.0004	19.401	0.656154	1.18623	16.8016	1.79265	1.37778	2.16174	1.76549	1.03264	2.93775	1.62039	-30.6905	24.2451	4.39848	5.22531	4.07031	3.55966	1.94306	2.26754	3.77215	1.34632	4.8992	2.50643	3.59383	79.5436	74.3185	76.9311	3.0543	6.08387	6.30475	5.75596	5.66885	4.30106	0.0666431	8.04871	5.22531	4.71	1032.69	1091	1093.92	846.802	916.796	1.19287	0.9588	1.43333	40.1913	3.52387
360	18.1856	21.1565	19.671	0.551142	1.43948	18.1856	2.38112	1.41113	2.30002	2.98773	1.04815	4.89344	2.00274	-30.2745	29.0143	5.81584	7.1179	3.72349	2.82654	1.50695	2.5873	2.83997	1.01067	4.07959	0.798094	2.92042	78.4954	64.8569	71.6762	2.24143	6.29391	6.70415	5.77665	7.95638	7.96772	1.04629	8.54691	7.1179	4.32077	802.501	869.132	857.953	638.575	662.103	1.12827	1.01955	1.24338	45.7305	4.88191
363	16.8856	23.2898	20.0877	0.344475	1.75948	16.8856	3.31624	1.0778	7.96668	3.98773	1.21482	6.11666	2.36877	-30.6465	30.4451	5.14917	4.1179	3.89015	2.68245	1.84028	1.5873	2.58997	1.01067	4.74626	0.605979	2.77885	81.0288	69.0236	75.0262	2.04143	5.42173	5.87082	4.87274	5.99864	5.96772	0.965506	6.59737	4.1179	4.22553	966.914	1050.3	1092.25	770.054	772.323	2.63338	1.18622	4.08429	37.0638	3.97894
364	14.4811	23.4233	18.9522	0.522226	2.05329	14.4811	1.30995	1.34264	1.1701	2.2159	0.965683	1.34864	0.769929	-30.2615	28.2365	5.5936	5.78865	3.56261	3.65241	2.48335	2.66898	3.93525	0.970106	4.90011	2.39497	3.55262	79.6654	64.4312	72.0483	3.10954	7.8949	8.50021	7.19059	7.75924	7.96772	0.436039	8.05592	5.78865	4.43245	750.222	802.932	747.953	653.745	612.761	1.3731	1.1951	1.54471	50.0146	4.58011
367	16.8189	21.7898	19.3044	0.434475	1.07948	16.8189	2.8511	2.0778	2.96668	4.32106	1.21482	4.85937	2.38614	-29.8755	27.4954	4.81584	5.1179	4.72349	2.81091	1.50695	2.25396	2.75663	1.01067	4.24626	1.01956	2.92757	80.8288	69.4236	75.1262	2.17476	7.1003	7.37082	6.72767	6.69354	6.96772	1.44717	6.91022	5.1179	4.17453	922.51	1017.03	1004.85	719.175	765.338	2.27618	1.35289	3.18933	53.0638	5.65112
368	16.0144	21.6233	18.8188	0.785559	1.62662	16.0144	2.58957	1.34264	2.83677	5.2159	1.46568	3.43342	2.74234	-29.7485	26.4881	4.26027	5.12198	3.39595	4.15803	3.15002	2.66898	4.35192	3.30344	5.23344	3.05185	3.76409	80.7654	72.1978	76.4816	3.90954	6.55572	6.33354	6.67488	7.22166	7.30106	2.28499	7.69577	5.12198	4.66109	965.728	1038.43	1023.05	799.767	818.79	1.04432	1.02844	1.0602	51.0146	4.25432
369	15.1856	19.4565	17.321	0.451142	0.94948	15.1856	3.38649	1.41113	7.63335	4.98773	1.54815	5.32139	1.66941	-30.0125	29.0143	4.14917	4.78456	5.05682	2.4932	1.17362	1.75396	2.58997	1.01067	4.24626	0.464761	2.25375	78.4288	72.2569	75.3428	2.04143	5.62724	5.87082	5.27665	5.95638	5.63439	1.20469	6.88025	4.78456	4.09855	1015.96	1107.26	1126.05	816.188	832.089	3.21161	1.18622	5.24338	41.0638	3.88191
37	15.3683	20.6004	17.9844	0.336154	0.989568	15.3683	2.04907	1.37778	2.16174	2.09882	1.03264	4.40718	2.01401	-30.218	29.0908	3.73182	6.22531	4.40364	3.31471	2.27639	1.93421	3.77215	1.67966	4.3992	1.3241	3.57411	82.8436	79.0185	80.9311	3.12097	5.8842	5.80475	5.86777	3.48107	2.96772	0.353138	NA	6.22531	4.71946	1171.45	1204.86	1354.05	905.339	1038.21	0.943429	0.9588	0.92542	36.1913	2.28003
370	16.5984	23.2865	19.9424	0.477145	1.63766	16.5984	1.29055	1.20178	0.701472	2.03088	0.953526	1.48245	1.57424	-30.2225	25.74	4.85874	5.20147	3.17409	4.6287	4.39997	2.64285	5.45264	1.67291	6.1211	2.49262	4.74137	82.3956	72.2267	77.3112	4.46401	7.13031	7.30713	6.84737	7.86042	7.63439	1.53946	8.62567	5.20147	4.80456	873.304	1017.03	921.887	676.946	694.341	1.05065	0.993211	1.10433	43.9085	3.90601
371	16.5984	23.4531	20.0258	0.637145	1.77766	16.5984	1.49495	1.20178	1.36814	2.36422	0.953526	1.81911	1.57935	-30.733	25.7557	4.85874	5.20147	3.34075	4.20452	2.73331	2.14285	4.8693	3.00624	6.28777	2.12406	3.81127	80.5956	73.5934	77.0945	4.26401	6.66895	7.14046	6.09443	7.8651	7.96772	1.99061	8.31598	5.20147	4.71575	883.398	1017.03	920.353	704.43	708.907	1.31031	0.993211	1.6274	48.2418	4.01059
372	18.7317	25.0865	21.9091	0.720478	1.72766	18.7317	1.85347	1.03511	1.70147	3.36422	1.28686	1.28278	2.94538	-30.222	25.5198	4.52541	4.53481	3.34075	3.79852	3.06664	2.30952	4.28597	1.67291	5.78777	1.93194	3.1697	81.6956	73.7934	77.7445	3.53068	6.21344	6.80713	5.52386	8.24069	8.30106	2.21709	8.69978	4.53481	4.17607	874.244	1017.03	926.953	678.369	691.267	1.06541	0.993211	1.13498	47.2418	3.21874
373	16.2984	23.1531	19.7258	0.327145	1.44766	16.2984	1.44098	1.36844	1.03481	2.03088	1.12019	1.88414	1.18573	-30.4685	24.2433	5.52541	5.86814	3.34075	4.85423	3.39997	3.97618	4.95264	4.33957	6.1211	2.47305	5.16432	78.1956	73.6267	75.9112	4.59734	6.78528	7.14046	6.31596	8.11859	7.96772	0.370415	8.90538	5.86814	4.8174	744.6	814.965	773.62	615.977	592.086	1.05975	0.993211	1.13531	51.9085	5.58777
374	16.8317	23.4865	20.1591	0.577145	1.83766	16.8317	1.45705	1.36844	1.70147	2.03088	0.953526	1.62205	1.24602	-29.739	25.7557	5.19207	5.53481	3.17409	5.13309	4.73331	3.14285	5.70264	3.00624	6.45444	3.45739	5.14461	82.1289	70.0601	76.0945	4.93068	7.16895	7.80713	6.42776	7.8651	7.63439	2.13322	8.64932	5.53481	5.04908	924.17	1042.73	1002.15	717.123	751.803	1.06031	0.993211	1.1274	42.2418	3.01059
375	12.7984	21.1198	16.9591	0.233812	1.62099	12.7984	1.43607	1.20178	1.70147	2.03088	0.953526	1.67809	1.27361	-30.209	29.5041	5.52541	5.20147	3.17409	4.55604	3.06664	3.47618	4.78597	2.00624	5.6211	3.13384	5.0998	81.9289	71.9934	76.9612	3.99734	6.59147	6.9738	6.11013	7.23602	6.63439	1.13454	8.34279	5.20147	4.26488	924.283	1042.73	988.553	718.578	763.771	1.05575	0.993211	1.11191	41.9085	3.33638
376	14.8984	20.6865	17.7924	0.337145	1.39099	14.8984	1.55379	1.53511	1.36814	2.03088	0.953526	2.08194	1.2685	-30.5005	23.4884	4.85874	5.53481	3.00742	4.50404	4.06664	2.97618	5.6193	2.00624	5.28777	2.33574	4.19656	81.1289	73.7934	77.4612	4.66401	7.2195	7.14046	7.19641	8.06467	8.30106	1.56144	8.31914	5.53481	4.3537	818.076	921.098	857.953	638.501	671.112	1.0461	0.993211	1.08884	47.5752	5.3429
377	17.6984	22.6531	20.1758	0.527145	1.51766	17.6984	2.01299	1.36844	1.70147	3.03088	0.953526	3.07809	2.60694	-29.872	23.5041	5.85874	5.53481	3.50742	4.03223	2.73331	2.30952	4.70264	2.67291	5.6211	2.13384	3.5998	80.3622	76.0601	78.2112	4.06401	7.6748	7.80713	7.44347	8.06935	8.30106	1.27574	8.34279	5.53481	4.26488	793.601	899.065	857.953	635.312	598.577	1.05575	0.993211	1.11191	51.5752	5.78082
378	16.8984	23.5198	20.2091	0.600478	1.51099	16.8984	2.16206	1.20178	2.03481	3.36422	1.12019	3.26663	2.87999	-30.022	27.9916	4.52541	5.20147	3.50742	3.61051	2.73331	2.80952	4.03597	1.00624	4.78777	1.98284	3.28618	80.4289	71.8601	76.1445	3.19734	6.54113	6.80713	6.165	7.32284	7.63439	2.19832	7.59886	5.20147	4.47765	929.747	1034.16	1016.25	732.558	753.63	1.0552	0.993211	1.11982	48.2418	3.58022
379	17.7683	23.8004	20.7844	0.726154	1.3329	17.7683	1.6305	1.04445	2.49508	1.43215	1.03264	2.739	1.35245	-30.2425	29.1065	4.06515	6.22531	3.90364	4.65243	3.60973	2.76754	5.52215	3.01299	5.73253	2.95553	4.31068	81.9436	77.5852	79.7644	4.78763	6.92284	7.13808	6.61482	4.4033	2.96772	-0.207238	8.21709	6.22531	4.85287	1123.45	1246.53	1265.25	867.005	931.793	0.953089	0.9588	0.948489	36.1913	2.2735
38	16.835	22.2004	19.5177	0.466154	0.956235	16.835	1.81069	1.04445	2.49508	1.76549	1.03264	2.79673	2.31464	-30.7115	27.3268	4.06515	6.55865	4.73698	3.41118	1.94306	2.43421	3.85548	1.01299	4.73253	1.68288	3.38235	81.8769	77.9185	79.8977	3.0543	5.75638	5.63808	5.77167	4.14774	3.63439	0.812894	NA	6.55865	3.81469	1153.73	1261.83	1280.15	907.743	982.32	0.938321	0.9588	0.917841	35.1913	2.40521
380	16.6016	22.0338	19.3177	0.476154	1.32957	16.6016	2.17489	1.71111	2.82841	3.09882	1.03264	2.85571	2.34223	-30.606	27.0752	4.39848	5.22531	3.23698	3.57223	1.94306	1.93421	4.35548	1.34632	4.56586	2.19266	3.50421	81.4436	74.0519	77.7477	3.52097	6.4289	6.30475	6.45404	7.28528	7.63439	1.44553	7.44133	5.22531	4.14161	865.258	1001.63	914.653	675.115	686.134	0.93377	0.9588	0.902352	53.858	5.06433
381	16.9683	22.5004	19.7344	0.566154	1.25623	16.9683	1.72868	1.04445	2.16174	2.09882	1.03264	2.77026	1.64798	-30.26	25.6601	4.73182	5.22531	3.40364	4.17308	2.60973	2.93421	4.52215	1.67966	5.3992	3.34955	3.88235	81.8436	73.9852	77.9144	3.72097	6.58971	6.80475	6.27167	6.08103	5.30106	0.330345	7.41452	5.22531	4.25914	969.613	1020.36	1046.15	789.533	839.53	0.938321	0.9588	0.917841	39.858	3.40521
382	17.4683	23.4004	20.4344	0.592821	1.22623	17.4683	1.8806	1.21111	2.82841	2.43215	1.03264	2.5951	1.95372	-30.685	26.9117	4.73182	5.55865	3.23698	4.32156	2.60973	2.60088	4.68881	2.01299	4.73253	3.83976	4.92716	82.5769	74.5519	78.5644	3.92097	6.25053	5.97142	6.42263	6.21012	4.96772	0.750459	8.05438	5.55865	4.04333	1034.16	1104.43	1172.12	831.375	846.466	0.942871	0.9588	0.933331	42.1913	3.30165
383	16.235	23.2004	19.7177	0.746154	1.53623	16.235	1.5432	1.04445	1.82841	1.76549	1.03264	2.41561	1.31975	-30.3565	29.3425	4.73182	6.89198	3.57031	4.36795	2.94306	2.43421	4.52215	3.01299	5.3992	3.98098	4.28559	81.7436	73.7185	77.7311	3.98763	6.29502	6.30475	6.18539	5.88591	4.30106	0.0385353	8.59134	6.89198	4.72588	1030.28	1104.43	1172.12	802.027	859.819	1.11465	1.29213	0.94091	35.5246	2.73202
384	17.835	23.5671	20.701	0.572821	1.43623	17.835	1.67216	1.21111	2.16174	2.09882	1.03264	2.40567	1.35245	-30.4925	30.4399	4.39848	6.55865	3.73698	3.93814	2.27639	2.60088	4.10548	1.01299	5.23253	2.95553	4.47735	83.3103	73.6185	78.4644	3.2543	6.17284	6.13808	6.11482	5.51956	3.96772	-0.29168	8.1244	6.55865	4.85287	1030.55	1104.43	1163.55	827.905	843.089	0.953089	0.9588	0.948489	40.858	2.49572
385	17.2016	22.0671	19.6344	0.719488	1.16957	17.2016	1.78326	1.21111	2.16174	2.09882	1.03264	3.05408	1.31464	-30.469	32.3268	3.73182	5.55865	4.23698	4.26832	2.94306	2.93421	4.35548	1.67966	5.56586	2.84955	5.04902	81.5436	76.4852	79.0144	3.58763	6.08971	5.97142	6.105	5.66885	4.30106	0.260731	8.04871	5.55865	5.25914	1049.32	1104.43	1162.52	838.28	909.163	0.938321	0.9588	0.917841	38.1913	2.07188
386	16.5016	21.6671	19.0844	0.392821	1.11957	16.5016	1.57992	1.21111	1.82841	2.09882	1.03264	2.19673	1.31464	-30.4895	27.9934	4.39848	5.55865	3.40364	3.31594	1.94306	1.76754	3.68881	1.67966	4.56586	1.68288	3.54902	82.8436	75.6185	79.2311	3.0543	5.75638	5.80475	5.605	5.91437	4.30106	0.717247	8.08119	5.55865	4.48136	1088.42	1203.83	1222.02	848.257	896.72	0.938321	0.9588	0.917841	39.1913	2.84965
387	17.0683	22.6004	19.8344	0.562821	1.43623	17.0683	1.9985	1.37778	2.49508	2.76549	1.03264	2.70738	2.34223	-30.4935	26.4085	4.06515	6.22531	3.23698	3.35794	1.60973	2.26754	3.77215	1.34632	4.3992	1.69266	3.67088	81.2769	72.0852	76.6811	3.0543	6.51223	6.47142	6.45404	6.95195	6.96772	1.29019	7.44133	6.22531	4.14161	909.061	1011	981.453	722.642	737.654	1.2671	1.12547	1.40235	47.5246	4.39766
388	17.5016	22.8671	20.1844	0.512821	1.20957	17.5016	1.38495	1.04445	1.82841	1.43215	1.03264	1.88279	1.28195	-30.3385	26.896	4.73182	6.55865	3.57031	4.46003	3.27639	2.60088	4.85548	1.67966	4.56586	5.04166	4.35726	83.1769	78.1852	80.6811	3.98763	6.87856	7.13808	6.50891	4.08991	2.63439	-0.0188334	8.06572	6.55865	4.79882	1168.14	1246.53	1341.05	908.278	994.333	0.933212	0.9588	0.910262	33.5246	2.30817
389	15.9016	23.4004	19.651	0.469488	1.24957	15.9016	1.47557	1.04445	1.82841	1.09882	1.03264	2.25408	1.64798	-30.561	29.3268	4.39848	5.55865	3.40364	4.41118	3.27639	2.43421	4.35548	3.34632	5.73253	3.01621	5.21569	82.9769	76.6185	79.7977	3.92097	5.75638	5.97142	5.43834	5.08103	3.96772	0.0947612	6.74786	5.55865	4.81469	1063.65	1165.7	1208.59	825.943	871.517	0.938321	0.9588	0.917841	38.5246	3.2941
39	17.135	22.4338	19.7844	0.469488	1.31957	17.135	2.1516	1.37778	2.49508	2.76549	1.03264	3.596	2.28195	-30.4305	27.5627	4.06515	5.89198	3.40364	3.55527	2.27639	2.26754	3.93881	1.01299	4.73253	2.37499	3.52392	80.4103	76.4519	78.4311	3.12097	6.79523	6.63808	6.84224	6.70544	6.30106	0.417151	7.6974	5.89198	4.24326	891.382	1001.63	951.553	701.658	728.303	0.933212	0.9588	0.910262	47.1913	4.41928
390	17.4683	22.0338	19.751	0.536154	1.10623	17.4683	2.1388	1.21111	2.49508	2.76549	1.03264	3.53775	2.62039	-30.3125	24.2451	4.73182	5.55865	3.90364	3.84537	2.94306	2.43421	4.18881	1.67966	4.3992	2.17309	4.76049	82.1103	75.5852	78.8477	3.4543	6.08387	6.30475	5.75596	6.37678	6.30106	0.299051	7.05438	5.55865	4.48778	881.265	986.432	939.253	701.835	715.299	0.942871	0.9588	0.933331	46.1913	4.07942
391	17.335	22.7004	20.0177	0.619488	1.37957	17.335	1.48496	1.04445	1.82841	1.76549	1.03264	1.93775	1.62039	-30.4445	30.2451	4.06515	5.55865	3.73698	4.39299	3.27639	2.93421	5.18881	2.34632	4.73253	2.83976	4.59383	81.1436	76.6852	78.9144	4.38763	6.50053	6.47142	6.42263	5.63816	4.30106	0.334162	8.02308	5.55865	5.04333	1055.61	1157.76	1172.12	836.825	873.476	0.942871	0.9588	0.933331	40.858	3.41276
392	18.0016	23.1004	20.551	0.539488	1.2429	18.0016	1.9452	1.04445	2.16174	2.43215	1.03264	3.13456	2.68067	-30.867	29.7575	4.06515	5.22531	3.23698	4.10042	2.60973	2.43421	4.18881	2.01299	5.56586	3.15743	4.40745	82.0103	76.5852	79.2977	3.52097	5.8842	5.63808	6.03443	6.62329	4.96772	0.588834	8.79831	5.22531	4.05279	1020.31	1104.43	1115.62	829.659	848.183	0.943429	0.9588	0.92542	44.858	3.16891
393	16.835	24.0671	20.451	0.522821	1.3929	16.835	1.77223	1.21111	2.16174	2.09882	1.03264	2.79673	1.64798	-30.3035	26.6601	3.73182	5.89198	3.07031	3.9588	2.27639	2.43421	4.60548	1.01299	5.06586	3.34955	3.54902	81.7103	77.3519	79.5311	3.6543	6.17305	6.30475	5.93834	5.48327	3.96772	0.158788	8.0633	5.89198	4.37025	1069.14	1184.43	1195.15	837.357	876.743	0.938321	0.9588	0.917841	38.5246	2.73854
395	15.9856	22.1898	19.0877	0.304475	1.11615	15.9856	1.74532	1.0778	2.63335	1.65439	1.04815	2.75243	1.697	-30.491	27.7627	4.81584	5.45123	3.72349	3.24949	1.84028	2.25396	3.75663	1.01067	4.74626	0.974546	3.37561	81.6954	71.4902	76.5928	2.97476	5.88309	6.03748	5.62569	4.8273	2.63439	-1.97536	7.57372	5.45123	4.86991	1000.54	1066.43	1122.85	789.533	840.453	0.957055	1.01955	0.894557	42.3971	3.31881
397	17.0856	23.3898	20.2377	0.331142	1.49281	17.0856	1.56366	1.24446	2.30002	1.32106	1.04815	2.15272	1.36366	-30.46	28.7627	5.48251	5.78456	3.89015	3.32092	1.50695	2.25396	3.75663	1.01067	4.57959	1.30788	3.87561	82.6954	70.3236	76.5095	2.97476	6.88309	7.03748	6.62569	5.3273	4.63439	-0.677226	6.57372	5.78456	4.86991	940.409	1017.03	1027.25	746.19	788.29	0.957055	1.01955	0.894557	44.0638	3.98547
398	16.1856	22.3898	19.2877	0.331142	1.24615	16.1856	1.91721	1.24446	2.30002	1.98773	1.04815	3.01141	2.39125	-30.6875	27.5111	5.48251	5.45123	3.22349	3.72006	2.50695	2.42063	4.50663	1.01067	4.57959	1.48433	4.3308	80.5954	69.7902	75.1928	3.57476	7.13894	7.53748	6.6414	6.86489	5.96772	0.114419	8.2672	5.45123	5.19682	894.004	988.232	939.253	721.945	743.087	0.952504	1.01955	0.879067	45.7305	4.08904
399	17.5856	23.1565	20.371	0.497809	1.28615	17.5856	2.24532	1.5778	2.63335	2.65439	1.04815	3.75243	2.36366	-30.7585	30.4294	4.81584	5.78456	3.05682	3.10663	1.50695	1.92063	3.4233	1.01067	4.57959	1.14121	3.54228	79.9621	70.1902	75.0762	2.70809	6.38309	6.37082	6.29236	7.3273	7.30106	0.983305	7.90706	5.78456	4.09213	854.216	971.965	888.653	675.283	698.093	1.37372	1.01955	1.72789	52.0638	5.20769
40	17.735	23.4671	20.601	0.439488	1.46623	17.735	2.21573	1.54445	2.82841	3.09882	1.03264	3.33775	2.28706	-30.8585	25.2451	4.39848	5.89198	3.40364	3.32156	1.60973	1.76754	3.35548	1.67966	4.8992	2.50643	3.26049	83.0436	73.6185	78.3311	2.78763	6.50053	6.47142	6.42263	6.21012	6.30106	0.589176	6.72104	5.89198	4.26556	906.119	1020.36	955.153	719.712	747.006	1.10954	1.29213	0.933331	43.5246	4.30165
401	16.8856	21.8565	19.371	0.344475	1.16281	16.8856	1.93118	1.24446	2.30002	1.98773	1.04815	3.16649	2.39636	-30.566	30.1935	4.81584	5.45123	3.72349	3.17683	1.50695	2.42063	3.33997	1.01067	4.74626	1.11576	3.56737	78.8621	71.5236	75.1928	2.64143	6.17758	5.53748	6.72178	7.7029	7.63439	1.46912	8.29085	5.45123	4.66356	867.279	955.698	914.653	684.379	731.03	0.962164	1.01955	0.902136	50.0638	4.74918
403	15.7523	21.6232	18.6877	0.497809	1.36948	15.7523	1.59425	1.0778	2.30002	1.32106	1.04815	2.5939	1.36366	-30.195	30.4294	4.48251	6.45123	3.72349	3.2733	1.50695	1.5873	3.83997	1.01067	5.24626	0.974546	3.70895	81.1954	73.6569	77.4262	3.04143	6.04976	5.87082	6.12569	4.3273	2.63439	-1.75767	6.57372	6.45123	5.20324	1019.18	1066.43	1140.52	813.607	873.31	0.957055	1.01955	0.894557	34.7305	2.42992
404	16.3523	20.6565	18.5044	0.441142	1.11281	16.3523	1.75246	1.41113	2.30002	2.32106	1.04815	2.38127	1.35856	-30.625	31.0804	4.81584	4.78456	3.55682	3.41177	1.84028	2.0873	3.33997	1.01067	4.74626	2.00978	4.47238	79.8954	73.9569	76.9262	2.64143	6.42779	6.70415	6.0453	5.48929	3.63439	-1.47067	7.88341	4.78456	4.40317	958.103	1025.6	1041.25	774.383	808.167	0.947395	1.01955	0.871488	41.3971	3.21422
405	16.2523	22.3232	19.2877	0.547809	1.29615	16.2523	1.80062	1.24446	1.96668	1.98773	1.04815	2.99967	1.6643	-30.4245	30.6653	4.48251	6.45123	4.22349	3.60786	1.50695	2.5873	4.25663	1.01067	4.57959	1.99999	3.85052	80.1288	71.1569	75.6428	3.37476	6.25527	6.37082	6.02959	5.78504	5.30106	-0.542392	6.8566	6.45123	5.40959	894.848	997.832	939.253	715.048	744.877	0.951946	1.01955	0.886978	43.0638	3.11066
406	17.0523	21.5898	19.321	0.251142	0.992814	17.0523	1.59578	1.24446	2.30002	1.65439	1.04815	2.21549	1.35856	-30.512	30.4137	5.48251	6.1179	3.89015	3.14986	1.50695	2.42063	3.6733	1.01067	4.91293	0.843112	2.80571	81.9621	72.8902	77.4262	2.90809	6.09445	6.87082	5.21197	5.98929	4.96772	-0.667921	7.55008	6.1179	5.06983	912.65	1017.03	967.453	715.806	767.297	1.1974	1.01955	1.37149	40.0638	4.65867
407	16.4189	21.6898	19.0544	0.447809	1.05281	16.4189	1.77479	1.24446	2.30002	1.65439	1.04815	2.7405	2.00274	-30.4045	30.681	4.81584	5.45123	3.89015	3.54082	1.50695	2.25396	3.6733	1.01067	5.24626	2.29809	3.92042	80.0954	72.0236	76.0595	2.90809	5.96058	6.20415	5.60998	6.12305	4.96772	-0.681716	7.88025	5.45123	5.32077	911.468	1007.43	974.953	711.858	769.389	0.961606	1.01955	0.910046	46.7305	3.7708
408	16.2189	21.2565	18.7377	0.474475	1.09948	16.2189	1.63425	1.0778	2.30002	1.32106	1.04815	2.8439	1.36366	-30.0115	30.4294	4.81584	5.78456	3.72349	3.51139	1.84028	2.25396	4.00663	1.01067	4.91293	1.80788	3.70895	79.4954	70.1569	74.8262	3.17476	6.04976	6.20415	5.79236	4.15304	2.96772	-1.68732	6.25918	5.78456	4.98102	996.655	1091.13	1115.62	795.267	785.561	0.957055	1.01955	0.894557	41.0638	3.20769
409	17.3523	21.4565	19.4044	0.587809	1.06281	17.3523	2.01992	1.24446	3.30002	1.98773	1.04815	3.18037	2.03033	-30.5085	30.4294	4.81584	5.45123	3.39015	3.46377	1.84028	2.0873	3.9233	1.01067	5.41293	1.47455	3.54228	80.6288	72.0902	76.3595	3.10809	6.13309	6.37082	5.79236	5.66063	4.63439	-1.1907	7.24039	5.45123	5.20324	896.421	1007.43	951.553	698.783	745.047	0.957055	1.01955	0.894557	45.0638	3.42992
41	16.5856	22.1232	19.3544	0.401142	1.19281	16.5856	1.82224	1.5778	2.30002	1.98773	1.04815	2.55243	1.697	-30.5435	27.7627	5.14917	6.45123	3.89015	3.70187	1.84028	2.25396	3.9233	1.01067	5.57959	2.30788	4.04228	80.7288	69.5569	75.1428	3.10809	6.46642	7.03748	5.79236	6.49397	5.30106	-0.546258	8.24039	6.45123	4.42546	894.517	988.232	967.453	706.657	732.857	0.957055	1.01955	0.894557	41.0638	3.31881
411	NA	NA	NA	NA	NA	NA	1.95042	NA	NA	3.88257	0.965683	1.69825	2.74745	-30.1845	26.5038	5.26027	5.12198	4.72928	3.80124	NA	NA	4.35192	1.97011	4.56677	2.84995	3.16733	NA	NA	NA	3.64287	6.59435	7.00021	6.0886	6.393	5.96772	1.10677	7.38609	5.12198	5.45771	979.015	1078.73	1046.15	778.88	829.569	1.05398	1.02844	1.08327	36.6813	3.79115
412	14.765	19.2865	17.0258	0.500478	1.23766	14.765	3.81181	5.36844	3.03481	4.03088	1.95353	1.94945	5.94538	-30.566	24.8531	5.52541	5.53481	6.17409	3.77471	2.06664	2.97618	3.70264	1.00624	5.1211	2.26527	4.6697	78.6622	72.9934	75.8278	2.93068	7.04677	7.30713	6.69052	4.40736	2.96772	-3.36577	6.36644	5.53481	4.28718	852.867	987.165	914.653	655.212	671.083	1.98208	1.49321	2.46831	47.5752	4.77429
413	19.4317	23.7865	21.6091	0.877145	1.99099	19.4317	2.51719	1.86844	1.70147	4.03088	1.45353	1.83334	5.58446	-30.5875	23.7714	5.52541	5.20147	3.34075	3.70891	1.73331	3.14285	3.3693	1.00624	5.1211	2.08882	5.04784	74.0622	69.1934	71.6278	2.66401	7.12425	7.4738	6.67482	8.48107	7.96772	-0.566255	NA	5.20147	3.18962	664.359	733.532	642.687	584.874	513.616	1.1533	0.993211	1.31714	53.5752	4.67073
414	16.9317	22.5865	19.7591	0.483812	1.48766	16.9317	1.4751	1.20178	0.701472	2.03088	0.953526	2.48103	1.27361	-30.6325	25.5041	4.52541	6.20147	3.50742	3.50842	1.73331	2.47618	4.1193	1.33957	4.45444	1.96717	3.43313	80.1289	73.3267	76.7278	3.33068	7.00813	6.9738	6.94347	8.23602	7.96772	1.80074	9.00946	6.20147	4.26488	867.132	1017.03	901.653	675.212	691.134	1.05575	0.993211	1.11191	49.5752	4.00304
415	NA	NA	NA	NA	NA	NA	1.97576	NA	NA	1.88257	0.965683	3.50602	2.4417	-29.7835	30.9189	5.5936	5.12198	5.06261	3.9456	NA	NA	4.43525	0.970106	4.40011	3.19307	4.12252	NA	NA	NA	3.50954	8.18354	8.33354	7.93764	6.5101	5.96772	2.25396	7.60137	5.12198	5.11475	1077.29	1184.43	1163.55	865.212	912.613	1.04943	1.02844	1.06778	43.348	4.11317
416	NA	NA	NA	NA	NA	NA	2.57409	NA	NA	3.88257	1.13235	3.69293	3.08078	-30.0565	28.5038	4.5936	4.45531	3.56261	2.98306	NA	NA	3.35192	0.970106	4.40011	1.84995	2.334	NA	NA	NA	2.64287	7.84435	7.83354	7.75527	7.31729	7.30106	3.42152	7.6698	4.45531	5.62437	1063.09	1165.7	1140.52	854.12	909.296	1.05398	1.02844	1.08327	40.348	3.79115
418	17.3856	22.9898	20.1877	0.357809	1.24948	17.3856	1.9503	1.41113	1.96668	1.98773	1.04815	3.1235	2.7348	-30.8825	30.2091	5.14917	6.1179	3.22349	3.27645	1.17362	2.25396	3.58997	1.01067	5.07959	1.2472	3.63728	81.1621	71.4569	76.3095	2.84143	7.13288	7.20415	6.96884	7.87424	8.30106	1.95472	7.98117	6.1179	4.46363	851.768	971.965	875.653	669.025	707.213	1.13849	1.01955	1.25854	47.0638	4.40932
419	16.4856	21.5565	19.021	0.421142	1.12948	16.4856	1.6351	1.24446	2.30002	1.98773	1.04815	2.28385	1.30338	-30.8285	31.5836	5.14917	5.78456	5.05682	3.30396	2.17362	2.42063	3.4233	1.01067	4.07959	1.99021	3.72866	81.0954	70.1569	75.6262	2.70809	6.83275	6.53748	7.01389	4.74746	2.63439	-1.6457	7.49645	5.78456	5.19378	1028.78	1099.2	1147.75	820.773	865.626	0.956497	1.01955	0.902467	35.7305	1.89598
42	17.7683	22.4671	20.1177	0.599488	1.37957	17.7683	1.8805	1.21111	2.49508	2.09882	1.03264	3.40567	1.68578	-30.9325	27.1065	4.73182	5.55865	3.90364	4.15243	2.60973	2.60088	4.52215	2.01299	5.23253	2.45553	4.97735	82.4436	75.0852	78.7644	3.78763	6.67284	6.97142	6.28149	5.1533	3.96772	0.401042	8.21709	5.55865	5.40842	1089.89	1194.13	1222.02	852.732	907.469	0.953089	0.9588	0.948489	35.1913	2.49572
420	16.7523	21.8232	19.2877	0.381142	0.962814	16.7523	1.72028	1.1142	1.96668	1.98773	1.04815	2.99949	1.36366	-30.871	35.7627	5.48251	5.45123	4.55682	3.67806	1.50695	1.92063	4.1733	1.01067	5.41293	1.97455	4.37561	81.2621	71.0236	76.1428	3.30809	6.54976	7.03748	5.95902	6.99397	6.30106	0.343694	8.24039	5.45123	4.86991	885.089	971.965	939.253	706.657	739.613	0.957055	1.01955	0.894557	42.3971	3.87436
421	17.3189	21.8565	19.5877	0.364475	1.14615	17.3189	1.42863	1.24446	1.96668	0.987727	1.04815	1.9405	1.33608	-30.6215	32.0143	5.48251	6.1179	4.22349	3.94558	2.17362	2.5873	4.50663	1.01067	5.74626	1.79809	4.42042	81.8621	71.9236	76.8928	3.57476	6.87724	7.03748	6.60998	4.62305	2.96772	-2.4515	6.88025	6.1179	5.09855	931.19	1017.03	1023.05	733.045	769.389	0.961606	1.01955	0.910046	39.0638	2.7708
422	NA	NA	NA	NA	NA	NA	1.72217	NA	NA	1.32106	1.04815	3.36666	1.70211	-30.5395	31.7784	5.48251	5.45123	3.39015	3.77883	NA	NA	4.00663	1.01067	5.24626	1.60598	4.77885	NA	NA	NA	3.17476	7.17173	7.53748	6.70608	6.16531	5.30106	-0.740779	7.59737	5.45123	4.96395	877.853	997.832	939.253	678.127	713.473	1.30005	1.18622	1.41763	43.3971	3.58726
423	16.5189	21.0898	18.8044	0.531142	1.39948	16.5189	1.94877	1.5778	1.63335	1.98773	1.04815	3.16633	2.33097	-30.4595	28.9987	5.81584	5.78456	3.22349	4.39358	2.50695	2.75396	4.75663	1.01067	4.41293	4.83333	5.01718	79.2288	65.8902	72.5595	3.77476	7.50527	7.70415	7.19626	7.95171	8.30106	1.77987	8.18993	5.78456	4.96514	836.788	939.432	888.653	641.765	694.92	1.20195	1.01955	1.38698	46.3971	3.99955
424	17.8189	23.5565	20.6877	0.357809	1.15281	17.8189	2.055	1.24446	2.96668	2.65439	1.04815	3.19039	2.06303	-30.6465	27.5268	5.14917	5.1179	3.55682	3.15302	1.84028	2.42063	3.33997	1.01067	4.91293	1.11576	3.06737	81.6288	71.6236	76.6262	2.64143	6.76091	6.53748	6.88845	6.36956	5.63439	-0.243756	7.62418	5.1179	4.44134	891.876	971.965	888.653	747.435	776.093	0.962164	1.01955	0.902136	46.7305	2.63806
425	15.9856	22.3565	19.171	0.131142	1.21615	15.9856	1.92911	1.0778	2.30002	1.98773	1.04815	3.04882	2.69189	-30.7325	36.4137	5.48251	6.45123	3.89015	3.81653	1.84028	2.5873	4.1733	1.01067	5.91293	1.34311	4.63904	83.5954	69.2902	76.4428	3.30809	6.92779	7.37082	6.37863	6.82263	5.96772	0.917554	8.21674	6.45123	5.06983	962.806	1025.6	1046.15	761.763	834.697	0.947395	1.01955	0.871488	41.3971	3.10311
426	15.1856	22.0898	18.6377	0.361142	1.15281	15.1856	1.42802	1.24446	2.30002	0.987727	1.04815	1.65937	1.38614	-30.469	30.8287	4.14917	5.1179	3.22349	3.7871	2.50695	2.75396	4.4233	1.01067	4.74626	2.01956	3.92757	81.2288	68.8569	75.0428	3.50809	6.01697	6.20415	5.72767	3.45019	1.96772	-1.25433	7.36174	5.1179	5.17453	1119.41	1218.93	1280.15	851.978	942.955	0.942845	1.01955	0.855999	36.3971	2.4289
427	16.2189	20.5232	18.371	0.404475	1.02615	16.2189	1.48403	1.13526	1.63335	0.987727	1.04815	2.38215	1.69189	-30.8035	30.4137	5.81584	5.1179	5.22349	3.9832	2.50695	2.92063	4.6733	1.01067	4.91293	1.84311	4.63904	83.6954	71.7236	77.7095	3.70809	7.01112	7.53748	6.37863	3.99253	1.96772	-1.15758	7.26392	5.1179	5.18095	1127.7	1229.53	1300.45	870.136	927.681	0.947395	1.01955	0.871488	36.0638	2.43644
428	16.3189	21.4898	18.9044	0.224475	1.10948	16.3189	1.70187	1.41113	1.96668	NA	NA	2.61666	1.36877	NA	31.7784	NA	NA	NA	3.34341	1.50695	2.25396	NA	NA	NA	1.27265	4.11218	80.2288	71.2569	75.7428	NA	6.69942	NA	6.53941	7.51621	NA	NA	8.59737	NA	5.07776	872.987	NA	NA	678.127	702.659	0.918299	NA	1.08429	NA	5.12186
429	16.7856	22.4565	19.621	0.271142	1.13281	16.7856	1.50318	1.24446	1.96668	0.987727	1.04815	2.05847	1.72459	-31.0685	30.1778	4.48251	4.78456	2.55682	3.10101	1.84028	2.0873	3.33997	1.01067	4.91293	1.151	2.99747	82.9954	69.3902	76.1928	2.64143	6.30561	6.37082	6.1414	2.14774	1.63439	-1.14862	NA	4.78456	4.53016	1157.03	1229.53	1320.75	913.962	980.361	0.952504	1.01955	0.879067	31.3971	1.64459
43	17.035	22.2004	19.6177	0.736154	1.3029	17.035	1.72676	1.37778	2.16174	2.09882	1.1993	2.3951	1.28706	-30.313	32.9117	4.39848	5.89198	3.07031	4.27394	2.60973	3.10088	4.43881	2.67966	5.56586	2.67309	4.59383	79.8436	72.5185	76.1811	3.8543	6.58387	6.47142	6.5893	3.48107	2.96772	-0.15538	NA	5.89198	5.37667	1127.89	1203.83	1250.35	885.635	989.506	1.19287	0.9588	1.43333	38.858	3.30165
430	17.7189	21.9898	19.8544	0.391142	1.11948	17.7189	1.36697	1.24446	1.30002	0.987727	1.04815	1.79016	1.40147	-30.6335	32.2091	4.81584	5.45123	3.05682	3.18122	1.50695	2.0873	3.6733	1.01067	4.74626	1.08053	3.30394	82.3621	70.2902	76.3262	2.90809	6.96622	7.20415	6.63551	6.5409	5.96772	0.22741	7.64783	5.45123	5.35252	903.683	997.832	963.253	715.565	754.869	1.05516	1.18622	0.925205	45.0638	3.52043
432	15.4856	21.8232	18.6544	0.571142	1.30948	15.4856	1.78915	1.24446	2.30002	1.98773	1.04815	2.58037	2.03033	-30.607	30.4294	4.81584	6.78456	5.22349	4.10663	2.17362	2.25396	4.33997	1.67733	4.91293	3.14121	5.37561	79.8288	72.7569	76.2928	3.57476	6.71642	6.87082	6.45902	4.8273	3.30106	-1.84721	6.90706	6.78456	5.20324	954.402	1041.73	1094.75	730.823	767.43	1.04039	1.18622	0.894557	42.0638	4.20769
433	16.2856	22.3898	19.3377	0.141142	1.21615	16.2856	1.26574	1.0778	1.30002	1.32106	1.04815	1.49344	1.33608	-29.8705	30.681	5.81584	5.78456	4.39015	3.30273	1.84028	1.92063	3.9233	1.01067	4.91293	1.29809	3.25375	83.0288	69.4902	76.2595	3.10809	7.37724	7.87082	6.77665	4.95638	3.30106	-1.87915	7.21358	5.78456	5.43188	951.666	1025.6	1041.25	757.118	800.453	0.961606	1.01955	0.910046	39.0638	1.65969
434	16.4189	22.2232	19.321	0.354475	1.29615	16.4189	2.03425	1.5778	2.30002	1.98773	1.04815	3.3439	2.36366	-30.449	30.4294	5.48251	6.1179	3.05682	3.65425	1.84028	2.42063	4.00663	1.01067	4.91293	1.47455	4.87561	80.0954	70.1569	75.1262	3.17476	6.71642	6.87082	6.45902	7.66063	7.96772	1.77161	7.90706	6.1179	4.20324	864.636	988.232	901.653	681.317	704.473	0.957055	1.01955	0.894557	56.0638	3.65214
436	15.2856	21.9232	18.6044	0.461142	1.35281	15.2856	1.61857	1.0778	2.30002	1.98773	1.04815	2.25847	1.39125	-30.599	27.5111	5.14917	5.78456	4.39015	3.62482	1.84028	2.42063	4.25663	1.01067	4.41293	2.31766	3.8308	79.9621	68.6236	74.2928	3.37476	7.22227	7.37082	6.97473	4.86489	2.63439	-2.64867	7.60054	5.78456	4.9746	942.855	1017.03	1046.15	728.602	796.134	1.2025	1.01955	1.37907	40.7305	2.08904
437	15.0189	21.8565	18.4377	0.444475	1.21615	15.0189	1.53363	1.41113	2.30002	0.987727	1.04815	1.79016	1.40147	-30.5015	30.2091	4.81584	6.45123	4.22349	3.84788	2.17362	2.75396	4.1733	1.01067	5.24626	2.2472	4.30394	80.6288	70.8236	75.7262	3.30809	7.04955	6.87082	7.13551	4.87424	2.63439	-2.87139	7.64783	6.45123	5.1303	923.775	1007.43	999.253	718.545	786.656	0.971823	1.01955	0.925205	40.0638	3.18709
44	16.7683	23.2004	19.9844	0.316154	1.2629	16.7683	1.59288	1.04445	2.49508	1.43215	1.03264	2.02924	2.0089	-30.7345	30.4085	4.06515	5.55865	3.90364	3.47699	1.94306	2.10088	3.93881	1.01299	4.56586	2.026	3.83755	83.2103	74.9852	79.0977	3.12097	6.34556	6.13808	6.45404	4.90834	3.30106	-0.107069	7.55345	5.55865	4.91939	1103.47	1194.13	1300.45	834.285	901.531	0.93377	0.9588	0.902352	37.5246	2.06433
441	17.2189	21.8898	19.5544	0.467809	1.21281	17.2189	1.75624	1.0778	1.96668	1.65439	1.04815	3.36666	1.70211	-30.393	31.1117	5.14917	5.45123	3.22349	3.63483	2.17362	2.25396	4.08997	1.01067	4.41293	1.77265	4.77885	79.2621	70.1236	74.6928	3.24143	7.25506	7.70415	6.70608	7.66531	7.30106	0.644524	8.59737	5.45123	3.66998	825.194	913.565	863.853	642.97	697.659	1.05005	1.01955	1.08429	41.3971	4.09006
442	15.1189	20.9898	18.0544	0.211142	1.11281	15.1189	1.83425	1.24446	2.30002	1.98773	1.04815	2.8439	2.03033	-30.829	31.7627	4.81584	5.78456	4.05682	3.5352	2.17362	2.5873	3.83997	1.01067	5.07959	1.47455	3.87561	81.3288	67.9569	74.6428	3.04143	6.54976	6.70415	6.29236	5.3273	4.63439	-0.496205	6.57372	5.78456	5.09213	955.916	1017.03	1041.25	778.97	803.54	1.20705	1.01955	1.39456	44.7305	3.20769
443	15.8189	20.6232	18.221	0.464475	1.21948	15.8189	1.44183	1.0778	2.30002	0.987727	1.04815	1.90159	1.36877	-30.13	30.4451	5.48251	5.1179	3.55682	3.49197	2.17362	2.92063	3.50663	1.01067	4.41293	2.60598	3.44552	80.3621	68.5236	74.4428	2.77476	7.50506	7.53748	7.37274	4.66531	3.30106	-2.17276	6.59737	5.1179	5.66998	926.514	1017.03	1018.45	720.28	767.563	0.966714	1.01955	0.917626	39.3971	3.20117
444	17.2683	21.4004	19.3344	0.506154	1.1229	17.2683	1.85711	1.21111	2.16174	NA	NA	2.63456	2.34734	NA	29.7575	NA	NA	NA	3.60266	1.94306	2.10088	NA	NA	NA	2.99076	3.24078	83.1769	77.3185	80.2477	NA	6.69043	NA	6.53443	6.76551	NA	NA	7.79831	NA	3.82991	1027.39	NA	NA	831.095	857.86	0.765815	NA	0.92542	NA	3.7521
445	14.5016	20.3671	17.4344	0.392821	1.05623	14.5016	2.65861	1.21111	4.82841	2.76549	1.36597	3.99763	3.30954	-30.3765	31.9778	3.73182	6.22531	4.40364	3.35917	1.94306	2.43421	3.85548	1.01299	4.56586	1.55145	3.31245	81.0436	73.4852	77.2644	3.0543	6.38441	5.97142	6.69128	3.48107	2.96772	0.0732488	NA	6.22531	5.01462	1147.48	1207.1	1258.95	917.07	1023.78	0.928661	0.9588	0.894772	36.5246	3.30063
446	16.335	21.8004	19.0677	0.406154	1.16957	16.335	2.38253	1.37778	4.16174	2.09882	1.1993	3.37026	3.31464	-30.62	32.6601	4.06515	5.89198	4.90364	3.31594	1.60973	1.93421	3.18881	1.01299	5.3992	1.84955	3.88235	82.4103	74.0852	78.2477	2.52097	6.17305	5.80475	6.43834	4.48107	3.96772	1.54125	NA	5.89198	4.70358	1187.57	1292.43	1354.05	918	1002.92	0.938321	0.9588	0.917841	32.858	2.96077
447	15.8683	21.4671	18.6677	0.222821	1.2429	15.8683	2.4632	1.54445	2.49508	3.43215	1.03264	3.91561	3.65309	-30.5985	32.6758	4.06515	5.22531	3.57031	3.15366	1.60973	1.93421	3.35548	1.01299	4.8992	1.48098	3.28559	81.1436	77.1852	79.1644	2.6543	6.71169	6.47142	6.85206	7.41904	8.30106	1.6441	7.10484	5.22531	4.17032	825.157	910.665	846.553	676.89	683.793	1.28131	0.9588	1.60758	51.1913	5.73202
448	16.7683	21.4671	19.1177	0.506154	1.2029	16.7683	2.3779	1.54445	2.49508	2.76549	1.03264	4.38252	2.98642	-30.3425	36.3425	4.39848	4.89198	3.40364	3.55842	2.27639	2.43421	3.85548	1.01299	4.3992	2.48098	3.78559	78.9436	75.5185	77.2311	3.0543	6.79502	6.97142	6.51873	7.58571	7.96772	0.759899	7.7715	4.89198	4.72588	777.966	819.932	826.52	649.1	633.586	1.11465	0.9588	1.27424	51.1913	5.73202
449	15.335	20.7338	18.0344	0.272821	1.22623	15.335	2.04907	1.21111	2.82841	3.09882	1.03264	2.74051	2.34734	-29.997	34.0908	5.06515	5.89198	3.07031	4.40995	2.60973	2.76754	4.35548	1.67966	4.8992	3.8241	6.07411	81.0769	73.0185	77.0477	3.58763	6.71754	7.13808	6.2011	7.62329	7.63439	0.965302	8.13165	5.89198	4.83057	824.118	916.432	869.753	650.555	676.377	1.8601	0.9588	2.75875	48.1913	5.0578
450	16.2478	23.3566	19.8022	0.768892	2.06329	16.2478	3.24587	1.17598	1.50343	3.88257	1.46568	6.76088	6.4417	-29.904	28.2522	4.26027	4.12198	4.39595	3.58537	3.15002	2.16898	4.26858	1.63677	4.23344	3.0264	2.28919	78.4654	69.8645	74.165	3.50954	8.1002	8.50021	7.60431	6.76392	7.30106	1.17969	6.74623	4.12198	5.46323	871.039	956.032	857.953	835.415	707.08	5.04943	3.02844	7.06778	51.348	4.20079
451	14.2811	24.6566	19.4688	0.785559	2.65996	14.2811	2.77304	1.17598	0.836768	3.54923	1.13235	6.22642	4.38142	-29.6095	33.0731	4.26027	4.78865	4.72928	3.5446	3.48335	1.83565	4.35192	1.30344	4.90011	2.3754	2.14223	79.8654	66.9978	73.4316	3.50954	7.8832	8.83354	6.82584	8.11729	8.30106	2.45645	8.1698	4.78865	5.66751	894.749	1001.63	913.953	770.305	710.866	1.8822	1.36177	2.40903	48.6813	3.48409
452	16.8811	22.4233	19.6522	0.858892	1.76996	16.8811	3.21662	1.17598	1.83677	4.54923	1.46568	5.49817	6.74234	-30.322	28.4881	4.5936	4.78865	5.06261	3.84851	3.15002	1.83565	4.01858	1.97011	5.56677	2.88519	3.59743	79.4654	70.8978	75.1816	3.37621	7.97238	7.83354	8.00821	7.22166	7.96772	2.1297	7.0291	4.78865	5.21665	895.313	1020.36	942.82	724.533	710.663	1.29432	1.1951	1.39354	50.348	4.25432
453	NA	NA	NA	NA	NA	NA	2.85362	NA	NA	4.2159	0.965683	4.75715	3.10326	-30.6685	30.9032	4.26027	5.12198	4.22928	4.09153	NA	NA	4.51858	1.30344	4.90011	3.39497	3.88595	NA	NA	NA	3.64287	7.8949	7.50021	8.19059	7.09258	6.96772	1.56326	7.72258	5.12198	4.74797	932.455	1029.73	1027.25	729.298	760.037	1.45644	1.1951	1.71138	50.0146	3.62296
454	NA	NA	NA	NA	NA	NA	4.21743	NA	NA	5.54923	1.46568	5.85769	6.07057	-30.321	29.1391	4.26027	4.78865	4.39595	3.48704	NA	NA	4.01858	0.970106	4.73344	2.75375	2.52752	NA	NA	NA	3.17621	7.76708	7.83354	7.59449	7.71698	8.30106	2.90737	7.67212	4.78865	5.22416	933.378	1046.06	992.753	744.383	767.297	2.03466	1.6951	2.37047	48.6813	2.9774
455	NA	NA	NA	NA	NA	NA	3.89079	NA	NA	3.88257	1.29902	5.94938	6.74234	-29.9645	27.1548	4.5936	4.45531	4.89595	3.52293	NA	NA	4.26858	0.970106	4.06677	2.21852	3.43076	NA	NA	NA	3.37621	8.38905	8.66688	8.00821	7.05499	7.63439	1.95913	7.0291	4.45531	5.42427	909.256	1029.73	951.553	727.823	745.047	2.62765	1.52844	3.72687	44.6813	3.46761
456	NA	NA	NA	NA	NA	NA	2.22504	NA	NA	2.98773	1.04815	4.11779	1.697	-30.9585	28.7627	5.14917	5.45123	6.05682	4.37931	NA	NA	4.58997	1.01067	5.91293	1.97455	5.87561	NA	NA	NA	3.64143	6.71642	7.03748	6.29236	5.99397	4.30106	-0.0641804	8.24039	5.45123	5.26384	1021.48	1134.26	1133.29	789.54	845.967	1.95705	1.01955	2.89456	40.7305	3.09705
458	NA	NA	NA	NA	NA	NA	1.88213	NA	NA	3.03088	1.12019	2.66074	1.61205	-30.2905	29.5198	5.19207	5.20147	3.34075	3.28983	NA	NA	3.70264	1.00624	4.95444	1.93194	2.6697	NA	NA	NA	2.93068	6.6301	6.4738	6.69052	8.07402	7.96772	1.07946	8.69978	5.20147	3.61325	805.342	877.032	854.153	656.685	650.143	1.64875	1.65988	1.63498	48.9085	4.21176
459	NA	NA	NA	NA	NA	NA	3.50407	NA	NA	5.69755	1.78686	3.41911	5.57935	-30.5785	27.7557	3.85874	5.20147	5.17409	3.56412	NA	NA	4.1193	1.00624	5.1211	1.79072	3.31127	NA	NA	NA	3.26401	6.08562	6.14046	5.92776	6.53176	6.30106	1.85779	7.31598	5.20147	3.58944	1014.8	1115.33	1122.85	798.33	839.807	1.06031	0.993211	1.1274	46.2418	3.89954
46	16.035	23.2004	19.6177	0.439488	1.2829	16.035	1.51833	1.04445	1.82841	1.76549	1.03264	2.31128	1.28706	-30.431	27.5784	4.73182	5.89198	4.23698	4.13108	2.27639	2.26754	5.10548	3.01299	4.8992	2.33976	4.09383	81.6103	75.9519	78.7811	4.4543	6.75053	7.30475	6.0893	4.81814	3.63439	-0.256931	6.97302	5.89198	4.82111	1062.08	1131.1	1185.55	850.752	898.679	0.942871	0.9588	0.933331	37.1913	2.52387
460	15.365	21.3865	18.3758	0.503812	1.71766	15.365	1.69795	1.20178	0.701472	3.03088	0.953526	2.48245	2.24091	-30.781	25.74	5.52541	5.86814	4.17409	5.00965	6.06664	3.97618	5.28597	3.00624	5.45444	3.32596	4.74137	79.6289	71.8934	75.7612	4.59734	7.79698	7.64046	7.84737	7.36042	7.63439	0.595043	7.62567	5.86814	4.69345	792.399	908.232	792.053	661.61	624.691	1.46731	1.32654	1.60433	48.2418	5.12823
461	13.965	22.1865	18.0758	0.597145	2.00766	13.965	1.57838	1.20178	1.03481	3.03088	0.953526	1.91188	1.60694	-30.134	29.5041	5.19207	5.20147	4.84075	4.50842	4.06664	2.97618	4.8693	3.33957	5.78777	2.46717	4.43313	80.8622	67.2934	74.0778	4.33068	6.9248	7.30713	6.44347	6.23602	5.63439	1.31419	7.34279	5.20147	5.59822	1025.34	1124.43	1140.52	815.062	837.847	1.05575	0.993211	1.11191	32.9085	2.44749
462	15.765	21.8531	18.8091	0.413812	1.42766	15.765	1.53398	1.36844	1.03481	2.03088	0.953526	2.02205	1.91268	-30.576	25.089	5.52541	5.53481	3.17409	3.46642	1.73331	2.47618	4.03597	1.00624	4.45444	1.95739	3.47794	80.8622	72.2934	76.5778	3.19734	7.08562	7.30713	6.76109	8.19843	8.30106	1.73676	8.64932	5.53481	4.04908	833.095	928.332	854.153	663.12	703.907	1.06031	0.993211	1.1274	51.2418	5.01059
463	16.7984	23.2865	20.0424	0.883812	1.72433	16.7984	1.9751	1.03511	1.70147	3.69755	0.953526	2.88103	2.60694	-30.729	29.5041	4.19207	5.53481	5.34075	4.4608	5.39997	2.47618	5.28597	1.67291	5.95444	1.96717	4.26647	81.3622	75.5267	78.4445	4.33068	7.00813	6.64046	7.2768	7.40268	6.63439	1.83921	8.67613	5.53481	5.48711	984.65	1115.33	1079.32	742.648	817.801	1.05575	0.993211	1.11191	37.2418	2.89193
464	17.3317	23.2198	20.2758	0.807145	1.48433	17.3317	1.90055	1.36844	1.70147	4.03088	0.953526	1.56306	3.21843	-30.436	26.0073	4.52541	5.20147	6.17409	4.75776	5.06664	2.97618	5.3693	2.33957	6.1211	2.4476	4.85608	81.3622	74.1601	77.7612	4.53068	7.49643	7.4738	7.41205	6.99418	6.30106	1.80277	8.28917	5.20147	5.0555	1010.08	1115.33	1102.69	798.312	841.766	1.06486	0.993211	1.14289	36.9085	2.90703
465	16.2984	21.4865	18.8924	0.537145	1.68099	16.2984	2.09229	1.20178	2.03481	3.69755	0.953526	2.96012	2.8851	-29.9415	30.0073	4.19207	4.86814	5.00742	4.3768	4.73331	3.64285	4.78597	2.00624	5.45444	2.4476	3.68942	83.3289	74.4934	78.9112	3.99734	7.32977	7.4738	7.07872	5.49418	4.63439	0.232399	6.95584	4.86814	5.49994	1018.33	1115.33	1179.35	739.738	856.669	1.06486	0.993211	1.14289	35.2418	2.46258
47	17.0683	23.6004	20.3344	0.572821	1.1929	17.0683	1.48196	1.04445	1.82841	1.43215	1.03264	2.23934	1.34734	-30.5785	29.7575	4.39848	5.89198	4.07031	4.12423	2.27639	2.60088	4.35548	2.67966	5.06586	2.99076	4.57411	83.5103	77.2185	80.3644	3.78763	5.8842	5.63808	6.03443	2.14774	1.63439	-0.853493	NA	5.89198	4.71946	1182.31	1277.13	1367.05	910.772	990.923	0.943429	0.9588	0.92542	34.5246	2.16891
473	NA	NA	NA	NA	NA	NA	1.4662	NA	NA	1.98773	1.04815	2.09277	1.36877	-30.486	27.7784	5.48251	5.45123	3.72349	2.93035	NA	NA	3.1733	1.01067	4.57959	0.939312	3.11218	NA	NA	NA	2.50809	6.50506	6.70415	6.20608	5.99864	4.63439	-0.2792	7.93071	5.45123	5.13061	974.506	1050.3	1059.09	786.99	818.923	0.966714	1.01955	0.917626	44.3971	3.25393
474	NA	NA	NA	NA	NA	NA	1.65687	NA	NA	1.65439	1.04815	2.78037	1.697	-29.797	31.0961	5.14917	6.1179	3.89015	3.80355	NA	NA	4.50663	1.01067	4.07959	1.80788	4.87561	NA	NA	NA	3.57476	6.96642	7.03748	6.79236	5.66063	4.63439	-1.59753	7.24039	6.1179	4.76384	861.569	971.965	947.187	646.16	698.093	2.54039	1.18622	3.89456	40.7305	4.43038
475	NA	NA	NA	NA	NA	NA	2.17662	NA	NA	NA	NA	2.99967	2.6643	NA	30.6653	NA	NA	NA	2.67647	NA	NA	NA	NA	NA	0.833328	3.01718	NA	NA	NA	NA	5.8665	NA	5.69626	5.42234	NA	NA	6.52326	NA	5.2923	948.86	NA	NA	732.558	800.32	1.88876	NA	2.05364	NA	4.5432
476	NA	NA	NA	NA	NA	NA	2.10548	NA	NA	1.98773	1.04815	3.7405	2.33608	-30.7325	30.681	5.48251	5.1179	3.72349	4.11373	NA	NA	4.1733	1.01067	5.07959	3.29809	4.75375	NA	NA	NA	3.30809	7.12724	7.37082	6.77665	7.45638	7.30106	0.73628	8.21358	5.1179	4.1068	833.054	930.265	860.053	650.738	708.919	1.04494	1.01955	1.07671	49.7305	4.60837
477	NA	NA	NA	NA	NA	NA	1.56686	NA	NA	0.987727	1.21482	2.69152	1.72459	-30.459	28.5111	4.48251	5.78456	3.89015	3.12973	NA	NA	3.75663	1.01067	4.24626	0.98433	3.3308	NA	NA	NA	2.97476	6.22227	6.53748	5.80806	4.2072	2.30106	-1.25113	9.43268	5.78456	5.25421	1091.13	1091.13	1257.22	878.038	954.647	0.952504	1.01955	0.879067	32.3971	2.7524
478	NA	NA	NA	NA	NA	NA	2.19463	NA	NA	3.69755	1.12019	2.41074	2.94538	-30.2765	25.5198	4.52541	5.20147	4.17409	4.19892	NA	NA	4.8693	1.00624	5.1211	3.26527	3.83637	NA	NA	NA	3.86401	6.96344	6.9738	6.85719	7.90736	8.30106	2.33526	8.03311	5.20147	4.44659	884.367	1017.03	934.887	687.359	714.837	1.06541	0.993211	1.13498	40.5752	3.0451
479	NA	NA	NA	NA	NA	NA	0.976837	NA	NA	2.03088	0.953526	0.826502	0.912684	-30.062	27.7557	4.85874	5.86814	4.84075	4.80655	NA	NA	5.45264	1.00624	5.28777	3.45739	5.64461	NA	NA	NA	4.33068	7.25228	7.4738	6.92776	4.8651	3.30106	-1.05247	6.98265	5.86814	4.92277	1022.49	1091.13	1163.55	807.88	844.507	1.06031	0.993211	1.1274	38.9085	2.89954
48	18.0016	23.7671	20.8844	0.766154	1.40623	18.0016	1.60489	1.04445	2.16174	1.76549	1.03264	2.48109	1.33712	-30.323	27.0595	4.73182	5.55865	3.90364	4.66308	2.94306	2.93421	4.68881	3.01299	5.73253	4.39456	4.76764	81.3436	73.9185	77.6311	4.12097	6.47359	6.80475	6.04032	3.48107	2.96772	0.323845	NA	5.55865	4.89709	1168.95	1261.83	1354.05	896.028	980.228	0.92411	0.9588	0.879283	29.858	2.84864
480	NA	NA	NA	NA	NA	NA	2.07114	NA	NA	3.09882	1.03264	3.17026	1.98131	-30.031	29.3268	4.39848	5.55865	3.40364	3.45207	NA	NA	3.68881	1.01299	4.23253	2.01621	4.21569	NA	NA	NA	2.92097	6.42305	6.47142	6.27167	7.58103	6.96772	0.920516	8.74786	5.55865	4.13738	877.393	971.232	909.587	706.27	739.613	0.938321	0.9588	0.917841	44.858	3.72481
481	NA	NA	NA	NA	NA	NA	1.33673	NA	NA	2.09882	1.03264	1.43015	1.67046	-30.1815	32.3928	4.39848	5.22531	3.23698	3.89388	NA	NA	3.93881	1.01299	5.06586	3.06123	4.26764	NA	NA	NA	3.12097	6.97359	6.97142	6.87365	6.44728	5.63439	-0.821959	7.75102	5.22531	4.26098	842.343	956.032	901.653	656.935	671.112	0.92411	0.9588	0.879283	44.1913	3.88994
482	NA	NA	NA	NA	NA	NA	3.44232	NA	NA	5.36422	1.45353	4.6515	4.27871	-30.942	27.5198	4.19207	5.20147	3.67409	3.41104	NA	NA	3.8693	1.00624	4.78777	1.93194	3.1697	NA	NA	NA	3.06401	6.3801	6.4738	6.19052	7.24069	7.30106	3.09461	7.69978	5.20147	4.11325	1035.08	1115.33	1147.75	824.209	869.69	1.31541	0.993211	1.63498	43.2418	3.71176
483	NA	NA	NA	NA	NA	NA	3.78939	NA	NA	5.69755	1.62019	4.58334	5.58446	-31.049	25.7714	3.85874	5.20147	3.67409	2.75152	NA	NA	2.53597	1.00624	5.1211	1.42216	2.38118	NA	NA	NA	1.99734	6.12425	6.4738	5.67482	8.03644	8.30106	3.39191	8.33963	5.20147	3.62288	974.887	1067.16	1051.05	779.457	819.146	1.06996	0.993211	1.15047	49.2418	3.88975
484	NA	NA	NA	NA	NA	NA	2.16945	NA	NA	2.09882	1.03264	4.13252	2.31975	-30.5785	29.3425	4.39848	5.89198	4.07031	3.42735	NA	NA	3.77215	1.34632	4.73253	1.81431	3.45226	NA	NA	NA	3.0543	6.46169	6.47142	6.35206	5.14774	4.63439	1.61523	NA	5.89198	5.17082	1136.8	1229.76	1269.39	888.194	977.113	1.19798	0.9588	1.44091	36.5246	4.54835
485	NA	NA	NA	NA	NA	NA	1.39398	NA	NA	1.65439	1.04815	2.12139	1.33608	-30.7005	30.681	4.48251	5.45123	3.55682	3.44707	NA	NA	4.1733	1.01067	4.41293	1.63143	3.42042	NA	NA	NA	3.30809	6.29391	6.37082	6.10998	5.28972	2.30106	-1.47614	8.88025	5.45123	4.94013	1071.86	1153.66	1236.92	835.902	878.703	0.961606	1.01955	0.910046	31.3971	2.9417
486	NA	NA	NA	NA	NA	NA	1.81088	NA	NA	2.65439	1.04815	2.66763	1.72459	-30.817	30.1778	5.81584	5.78456	5.22349	4.58428	NA	NA	4.33997	1.01067	4.91293	5.31766	5.16414	NA	NA	NA	3.44143	7.55561	7.87082	7.1414	5.53155	4.63439	-2.04181	6.93387	5.78456	5.08754	823.509	922.298	860.053	641.485	686.701	4.61917	2.35289	6.87907	39.3971	3.41906
487	NA	NA	NA	NA	NA	NA	1.54913	NA	NA	1.32106	1.04815	2.65385	1.69189	-30.514	25.0804	5.48251	5.45123	3.05682	3.1616	NA	NA	3.58997	1.01067	4.07959	1.67645	3.30571	NA	NA	NA	2.84143	7.17779	7.53748	6.71197	5.48929	3.96772	-1.45101	7.55008	5.45123	5.2304	931.233	1017.03	1027.25	730.336	767.297	1.4474	1.01955	1.87149	43.7305	2.60684
488	NA	NA	NA	NA	NA	NA	1.5434	NA	NA	0.987727	1.04815	2.90159	1.70211	-30.2435	31.1117	4.81584	6.45123	3.72349	3.26368	NA	NA	3.6733	1.01067	4.41293	1.60598	3.44552	NA	NA	NA	2.90809	6.0884	6.03748	6.03941	3.64381	2.30106	-0.832937	7.2813	6.45123	5.13061	1126.96	1218.93	1285.55	858.994	961.629	0.966714	1.01955	0.917626	36.3971	2.92059
49	17.235	23.5004	20.3677	0.466154	1.19957	17.235	2.18011	1.37778	2.16174	3.09882	1.03264	3.76527	1.9762	-30.787	29.9778	4.06515	5.22531	2.73698	3.47822	2.27639	2.10088	3.68881	1.01299	4.73253	2.55145	3.47912	79.8103	75.0519	77.4311	2.92097	6.30108	5.80475	6.69128	7.74302	7.96772	1.40206	8.05754	5.22531	3.57018	832.978	945.465	863.853	661.513	678.071	0.928661	0.9588	0.894772	52.5246	5.30063
490	NA	NA	NA	NA	NA	NA	3.4092	NA	NA	5.69755	1.45353	4.6146	3.95049	-30.4905	27.5355	3.85874	4.86814	3.34075	3.32571	NA	NA	3.8693	1.00624	4.6211	1.73004	3.07294	NA	NA	NA	3.06401	6.41874	6.64046	6.10424	7.74537	7.96772	2.25074	8.05676	4.86814	4.31336	905.682	1017.03	963.253	715.875	743.353	1.07507	0.993211	1.15805	46.9085	3.86864
491	NA	NA	NA	NA	NA	NA	1.85049	NA	NA	3.36422	1.28686	2.07777	1.58446	-30.3905	25.7714	4.19207	5.20147	3.00742	3.44849	NA	NA	3.8693	1.33957	4.28777	2.42216	3.21451	NA	NA	NA	3.13068	6.45759	6.30713	6.50815	6.03644	6.30106	-0.331205	6.33963	5.20147	4.95621	827.273	869.798	857.953	692.25	706.363	1.56996	1.49321	1.65047	42.5752	3.55642
493	NA	NA	NA	NA	NA	NA	1.91531	NA	NA	3.03088	0.953526	3.08701	1.58446	-30.0045	23.7714	3.85874	6.53481	3.17409	3.23637	NA	NA	3.70264	1.33957	4.6211	1.75549	2.71451	NA	NA	NA	2.99734	6.29092	6.64046	5.84148	7.70311	7.96772	1.90265	8.0063	6.53481	4.45621	875.862	1017.03	942.82	661.264	699.606	1.06996	0.993211	1.15047	49.2418	4.88975
495	15.3523	20.1565	17.7544	0.234475	0.882814	15.3523	1.3607	1.0778	2.30002	0.987727	1.04815	1.55243	1.36366	-30.3435	27.7627	4.48251	6.1179	4.39015	3.43996	1.84028	2.0873	3.9233	1.01067	4.91293	1.47455	3.87561	80.4288	74.2569	77.3428	3.10809	5.29976	5.20415	5.29236	NA	NA	NA	NA	6.1179	4.86991	1212.53	1277.93	1437.85	917.47	1034	0.957055	1.01955	0.894557	NA	2.87436
496	16.5856	20.9898	18.7877	0.277809	1.41948	16.5856	2.15624	1.24446	1.96668	2.32106	1.04815	4.11666	3.03544	-30.7095	30.4451	6.14917	5.1179	4.22349	4.94435	4.50695	3.42063	5.75663	1.01067	4.91293	3.43931	6.11218	81.6954	69.5236	75.6095	4.57476	7.50506	7.70415	7.20608	7.49864	7.63439	1.05888	7.93071	5.1179	5.22553	832.135	955.698	875.653	630.667	683.793	1.46671	1.01955	1.91763	42.7305	4.75672
499	15.4856	22.6232	19.0544	0.464475	1.22615	15.4856	2.12005	1.11303	2.30002	1.98773	1.04815	4.19949	2.36366	-30.959	28.7627	4.81584	4.1179	5.22349	2.93996	1.17362	1.5873	2.9233	1.01067	5.24626	1.14121	3.20895	79.6288	70.2902	74.9595	2.30809	6.79976	7.37082	6.12569	4.99397	2.96772	-1.29827	7.57372	4.1179	4.42546	1029.98	1066.43	1140.52	834.72	895.393	1.95705	1.01955	2.89456	35.0638	2.76325
50	16.535	22.6671	19.601	0.569488	1.46623	16.535	2.15176	1.54445	2.16174	3.43215	1.03264	3.17026	2.31464	-29.8835	31.9934	3.73182	5.89198	4.07031	4.05404	2.94306	2.76754	4.10548	1.67966	4.73253	3.51621	4.38235	81.4769	74.0852	77.7811	3.38763	6.67305	6.47142	6.77167	6.7477	6.30106	0.528022	7.74786	5.89198	4.37025	900.88	1001.63	951.553	712.617	754.85	1.27165	1.12547	1.41784	44.858	3.73854
500	13.8189	20.2232	17.021	0.297809	1.14948	13.8189	2.98059	1.91113	4.96668	3.32106	1.21482	4.72532	3.39636	-30.741	30.8601	4.81584	5.45123	5.89015	3.1054	1.50695	2.25396	3.33997	1.01067	4.91293	1.11576	3.06737	80.3621	68.2236	74.2928	2.64143	6.76091	6.70415	6.72178	5.2029	3.63439	-0.873322	7.29085	5.45123	4.77467	1009.28	1050.3	1115.62	806.145	881.687	1.62883	1.18622	2.0688	43.3971	3.41584
502	14.0523	20.1232	17.0877	0.387809	1.13615	14.0523	1.27106	1.0778	2.30002	NA	NA	1.26464	1.71948	NA	29.1621	NA	NA	NA	4.36224	2.50695	2.25396	NA	NA	NA	3.8529	4.59424	79.5288	70.5569	75.0428	NA	7.3899	NA	7.22767	NA	NA	NA	NA	NA	5.50125	1158.5	NA	NA	923.958	1026.95	0.703893	NA	0.855999	NA	1.96345
504	NA	NA	NA	NA	NA	NA	1.53516	NA	NA	2.76549	1.03264	1.91306	1.34223	-30.398	29.0752	4.73182	6.22531	3.23698	3.96007	NA	NA	3.60548	1.01299	4.8992	2.69266	5.83755	NA	NA	NA	2.8543	6.84556	6.80475	6.78738	6.61862	5.96772	-0.146446	7.77467	6.22531	4.29442	871.656	986.432	951.553	664.575	700.567	1.2671	0.9588	1.56902	46.1913	3.88015
505	NA	NA	NA	NA	NA	NA	0.983388	NA	NA	NA	NA	1.28127	1.95049	NA	29.5355	NA	NA	NA	3.14245	NA	NA	NA	NA	NA	2.06337	2.73961	NA	NA	NA	NA	5.9238	NA	5.77091	NA	NA	NA	NA	NA	5.3466	1166	NA	NA	949.385	1016.94	0.994693	NA	1.15805	NA	5.01026
507	NA	NA	NA	NA	NA	NA	2.60631	NA	NA	3.54923	1.13235	3.19102	4.4039	-30.0935	26.4724	5.5936	4.78865	4.05812	5.15371	NA	NA	5.01858	2.97011	5.90011	4.42042	5.86086	NA	NA	NA	4.37621	8.18375	8.33354	7.92782	6.05032	5.30106	0.415391	7.33879	4.78865	5.05749	976.898	1079.53	1041.25	785.26	818.537	1.03466	1.02844	1.03713	48.348	4.1977
508	NA	NA	NA	NA	NA	NA	1.85705	NA	NA	2.54923	1.29902	2.63067	1.71475	-30.1275	26.0731	5.26027	4.45531	4.70482	5.13614	NA	NA	4.85192	3.30344	5.40011	5.04207	5.8089	NA	NA	NA	4.30954	8.29987	8.66688	7.82584	4.86658	4.30106	0.360453	6.09411	4.45531	5.10056	1057.86	1146.96	1148.26	855.855	897.749	1.04887	1.02844	1.07569	40.6813	4.20201
509	NA	NA	NA	NA	NA	NA	3.17751	NA	NA	3.88257	1.13235	5.4854	3.40901	-30.277	28.4881	4.26027	5.12198	4.72928	3.09869	NA	NA	3.35192	0.970106	4.56677	2.05185	2.59743	NA	NA	NA	2.64287	7.63905	7.33354	7.84155	7.05499	7.30106	2.53861	7.36244	5.12198	5.09093	987.454	1079.66	1046.15	832.83	808.3	1.21099	1.02844	1.39354	39.348	3.46761
51	15.335	24.2671	19.801	0.516154	1.39957	15.335	1.6179	1.04445	2.16174	1.43215	1.03264	2.38252	1.98642	-30.547	30.0091	4.06515	6.89198	4.23698	3.32033	1.60973	2.10088	3.52215	1.01299	4.8992	1.98098	3.45226	81.4769	76.1852	78.8311	2.78763	5.96169	5.97142	5.85206	2.60345	2.0891	0.446323	NA	6.89198	4.72588	1254.71	1354.5	1476.89	944.314	1060.4	1.19798	0.9588	1.44091	30.3372	2.62091
510	NA	NA	NA	NA	NA	NA	1.2934	NA	NA	0.987727	1.04815	2.15159	1.36877	-30.756	28.7784	5.14917	4.45123	3.39015	3.74853	NA	NA	4.25663	1.01067	4.91293	2.27265	3.77885	NA	NA	NA	3.37476	6.8384	7.20415	6.37274	4.66531	2.63439	-2.69271	7.26404	4.45123	5.13061	939.082	1041.73	1055.52	720.977	755.373	0.966714	1.01955	0.917626	41.3971	2.92059
52	15.235	22.3671	18.801	0.359488	1.3229	15.235	1.8979	1.21111	2.49508	2.09882	1.03264	3.38252	1.65309	-30.407	27.3425	4.06515	6.55865	4.73698	4.15366	2.94306	2.60088	4.27215	1.34632	4.56586	4.31431	4.45226	81.8769	73.9519	77.9144	3.4543	6.62835	6.47142	6.68539	4.75238	3.63439	-0.937226	6.43817	6.55865	5.05921	1003.8	1038.43	1120.82	798.814	874.416	0.94798	0.9588	0.94091	38.5246	3.39868
53	16.1016	21.6338	18.8677	0.472821	1.18623	16.1016	1.78519	1.04445	3.16174	2.43215	1.03264	2.22924	1.67557	-30.317	27.0752	4.39848	6.22531	4.40364	3.73889	2.27639	2.60088	4.02215	1.01299	5.56586	2.19266	3.67088	81.3103	72.8519	77.0811	3.18763	6.09556	5.97142	6.12071	3.14774	2.63439	-0.428104	NA	6.22531	4.80828	1133.08	1204.86	1240.12	907.998	995.854	0.93377	0.9588	0.902352	37.5246	2.28655
54	14.8856	21.9898	18.4377	0.331142	1.31948	14.8856	1.45036	1.11303	1.63335	1.32106	1.04815	2.19152	1.39125	-31.0235	30.1778	4.81584	6.1179	5.72349	3.67244	1.84028	2.5873	4.25663	1.01067	5.24626	1.31766	4.16414	79.5621	68.3236	73.9428	3.37476	6.88894	7.37082	6.30806	2.14774	1.63439	-1.70672	NA	6.1179	4.64127	1109.22	1164.26	1276.62	848.788	963.691	0.952504	1.01955	0.879067	39.0638	3.08904
546	16.2811	22.6566	19.4688	0.785559	1.69329	16.2811	2.35281	1.34264	3.50343	3.54923	1.46568	2.75938	3.01539	-29.806	26.309	4.5936	5.12198	3.56261	3.23631	2.81668	2.16898	3.51858	0.970106	4.23344	2.23418	2.61714	79.7987	69.3312	74.565	2.77621	7.25538	7.83354	6.56308	6.64181	6.63439	1.23564	7.28517	5.12198	4.87386	932.944	1029.73	990.853	758.22	771.216	1.96043	1.1951	2.73478	47.0146	3.72039
547	15.3478	22.0566	18.7022	0.652226	1.62662	15.3478	2.54309	1.67598	2.83677	3.88257	1.46568	3.63067	2.71475	-29.943	26.0731	4.26027	5.45531	4.39595	3.25889	2.81668	2.16898	3.51858	0.970106	4.40011	2.20874	2.64223	80.0321	67.6645	73.8483	2.77621	7.04987	6.83354	7.15917	7.35074	6.96772	1.72324	8.33563	5.45531	5.00084	946.16	1029.73	1000.25	756.485	815.929	2.21554	1.6951	2.74236	50.348	4.26187
548	14.5811	21.6566	18.1188	0.515559	1.67329	14.5811	1.90893	1.00931	2.50343	2.88257	0.965683	2.89817	2.07567	-30.406	26.4881	4.26027	6.12198	3.72928	4.13422	3.48335	3.16898	4.60192	1.63677	5.40011	2.88519	3.26409	81.2987	71.5645	76.4316	3.77621	6.80572	7.33354	6.17488	7.05499	7.30106	2.89675	7.36244	6.12198	4.88332	1018.14	1104.43	1115.62	809.683	859.937	1.04432	1.02844	1.0602	51.0146	3.69877
549	14.5478	21.8233	18.1855	0.522226	1.62662	14.5478	1.89088	1.00931	2.1701	4.54923	1.29902	2.03918	1.38142	-30.115	26.7398	4.5936	6.12198	4.72928	3.56841	3.15002	2.50231	4.10192	1.63677	5.23344	2.20874	1.97557	82.2987	70.4312	76.365	3.37621	6.46653	7.16688	5.65917	6.51741	6.96772	2.2083	6.66896	6.12198	4.44529	987.713	1072.03	1051.05	803.762	841.766	1.29887	1.02844	1.57569	46.6813	3.5952
55	15.9523	21.0898	18.521	0.361142	1.02615	15.9523	1.67377	1.24446	2.30002	1.65439	1.04815	2.38037	1.697	-30.8765	30.4294	4.48251	7.1179	5.05682	3.36854	1.17362	2.25396	3.75663	1.01067	5.41293	1.64121	3.20895	81.9288	72.5569	77.2428	2.97476	6.13309	5.53748	6.62569	3.76038	2.30106	-2.1164	6.27753	7.1179	5.09213	1017.01	1058.6	1156.32	780.13	890.117	0.957055	1.01955	0.894557	37.7305	3.09658
550	15.2478	23.5566	19.4022	0.568892	1.89329	15.2478	2.07161	1.17598	2.50343	3.88257	1.13235	2.74017	2.09815	-30.354	26.2208	4.26027	5.45531	3.89595	4.43374	3.15002	3.00231	4.85192	2.63677	4.90011	4.09687	3.98272	81.1321	69.1645	75.1483	4.17621	6.85626	7.00021	6.6102	6.5879	7.30106	2.40023	6.3656	5.45531	5.41016	975.6	1062.4	1068.89	781.265	806.208	1.03011	1.02844	1.02164	47.348	3.80886
551	14.7811	24.2233	19.5022	0.652226	1.78996	14.7811	1.56906	1.34264	1.83677	2.88257	0.965683	1.27198	1.4417	-30.1075	25.5855	4.26027	5.78865	4.06261	4.08537	3.48335	2.83565	4.10192	2.63677	5.23344	2.85974	3.95586	81.1321	69.4312	75.2816	3.57621	7.18354	7.66688	6.60431	5.93059	4.96772	0.452589	7.4129	5.78865	5.34364	1008.64	1095.86	1105.19	802.499	847.657	1.04943	1.02844	1.06778	43.6813	3.46247
552	14.7478	23.5233	19.1355	0.695559	1.92662	14.7478	1.62001	1.00931	1.83677	2.88257	0.965683	2.23067	1.38142	-30.349	27.4064	4.26027	5.45531	4.06261	3.85413	3.15002	2.50231	4.68525	1.30344	5.23344	2.54207	2.64223	81.8987	67.6978	74.7983	3.77621	6.79987	6.66688	6.82584	7.35074	7.63439	2.26407	7.66896	5.45531	4.77862	935.379	1029.73	997.353	747.552	784.639	1.04887	1.02844	1.07569	48.0146	3.70631
56	16.8683	22.8338	19.851	0.449488	1.20623	16.8683	1.95752	1.37778	2.16174	2.43215	1.03264	3.1951	1.95372	-30.746	27.5784	4.06515	5.55865	3.23698	3.03585	1.60973	1.60088	3.18881	1.01299	4.3992	1.67309	3.42716	81.5769	75.5852	78.5811	2.52097	5.9172	5.97142	5.75596	6.87678	6.63439	0.306714	7.72104	5.55865	3.82111	853.366	956.032	875.653	693.672	705.866	0.942871	0.9588	0.933331	50.858	5.19053
57	16.0189	21.0898	18.5544	0.301142	1.01948	16.0189	1.63281	1.24446	2.30002	1.98773	1.04815	2.21549	1.35856	-30.247	31.0804	4.48251	6.78456	4.39015	3.7451	1.84028	2.25396	4.25663	1.01067	5.24626	2.34311	3.97238	82.0288	73.2902	77.6595	3.37476	5.67779	5.87082	5.37863	4.15596	2.96772	-2.53942	5.88341	6.78456	4.95872	923.658	1017.03	1011.35	720.7	762.537	0.947395	1.01955	0.871488	40.0638	3.54756
58	16.235	23.0338	19.6344	0.376154	1.26623	16.235	1.8385	1.04445	2.82841	2.09882	1.03264	2.70738	2.0089	-30.5185	31.7418	4.06515	6.55865	3.90364	3.59604	1.27639	2.26754	3.85548	1.01299	5.23253	2.026	4.33755	82.2769	76.6185	79.4477	3.0543	5.76223	5.47142	5.95404	5.11395	3.63439	-0.364746	7.58892	6.55865	4.14161	1052.84	1157.76	1135.62	839.735	894.761	0.93377	0.9588	0.902352	40.5246	2.84211
59	17.135	22.4671	19.801	0.552821	1.17623	17.135	1.61839	1.04445	2.16174	1.76549	1.03264	2.39673	1.64798	-30.0675	27.9934	4.73182	5.55865	3.57031	4.17308	2.27639	2.26754	4.68881	2.34632	5.3992	2.84955	4.54902	81.0769	75.2519	78.1644	3.98763	6.75638	6.80475	6.605	5.7477	4.96772	0.397681	7.08119	5.55865	4.59247	1003.94	1106.2	1125.72	765.267	835.693	0.938321	0.9588	0.917841	40.858	2.96077
6	17.0683	22.7004	19.8844	0.326154	1.31623	17.0683	2.03196	1.37778	2.16174	3.09882	1.1993	2.93194	1.9762	-30.858	27.9778	4.39848	5.55865	3.40364	3.52584	1.94306	2.10088	4.02215	1.01299	4.06586	3.05145	3.47912	81.4103	74.6185	78.0144	3.18763	6.63441	6.30475	6.85795	7.90969	7.96772	1.12626	8.39087	5.55865	4.12573	809.351	870.032	850.353	655.48	678.527	1.01199	0.9588	1.06144	44.858	5.18952
60	15.7683	22.4004	19.0844	0.336154	1.30623	15.7683	1.51403	1.04445	1.82841	2.09882	1.03264	2.05408	1.31464	-30.229	27.3268	4.39848	5.89198	4.07031	4.36356	3.27639	2.60088	4.52215	3.01299	4.8992	3.84955	4.54902	82.2103	76.7519	79.4811	3.98763	6.50638	6.80475	6.105	4.06488	2.96772	-0.640006	6.96559	5.89198	4.81469	1086.38	1186.4	1222.02	838.28	915.933	1.10499	1.29213	0.917841	40.858	2.62743
62	15.235	23.6671	19.451	0.546154	1.4629	15.235	1.6901	1.04445	2.16174	2.09882	1.1993	2.31309	1.64287	-30.196	29.9778	4.39848	5.55865	4.73698	3.97822	2.94306	2.76754	4.27215	1.01299	5.06586	2.05145	4.97912	81.6436	73.9519	77.7977	3.38763	6.55108	6.30475	6.69128	4.86324	3.96772	-0.294033	6.51324	5.55865	4.7924	1030.35	1104.43	1138.65	829.133	866.157	1.09533	1.29213	0.894772	39.858	2.63396
627	16.9984	22.1198	19.5591	0.520478	1.24433	16.9984	2.0763	1.20178	2.36814	3.69755	1.12019	2.32777	2.91779	-31.263	27.7714	4.85874	4.53481	3.67409	3.42319	1.73331	2.47618	3.78597	1.00624	4.6211	2.08882	3.38118	80.8622	74.6601	77.7612	2.99734	7.04092	6.64046	7.34148	6.86977	7.63439	1.97514	6.67296	4.53481	4.07137	910.628	1034.16	974.787	730.98	719.853	1.23663	0.993211	1.4838	48.2418	4.00406
628	16.765	22.8865	19.8258	0.637145	1.21099	16.765	2.81181	1.53511	3.36814	4.69755	1.62019	3.61611	3.61205	-30.4925	27.5198	4.19207	4.86814	3.50742	3.25091	2.06664	1.97618	3.70264	1.00624	5.1211	1.59861	2.6697	78.2289	75.2934	76.7612	2.93068	6.46344	6.9738	5.85719	8.40736	8.63439	2.55284	8.69978	4.86814	4.62051	874.451	1017.03	901.653	693.682	702.08	4.39875	3.32654	5.46831	54.2418	4.32985
629	16.1317	21.0198	18.5758	0.493812	1.18433	16.1317	3.69654	4.36844	4.70147	5.03088	1.45353	3.66074	3.94538	-30.371	29.5198	4.19207	4.86814	3.34075	2.989	1.39997	2.14285	3.45264	1.00624	4.1211	1.76527	2.33637	78.9956	75.2267	77.1112	2.73068	6.79677	6.64046	6.85719	7.07402	6.96772	1.35126	7.69978	4.86814	4.73162	914.293	1025.6	969.153	729.089	749.977	3.48208	2.15988	4.80165	46.2418	4.66318
630	15.6811	23.9899	19.8355	0.665559	1.79996	15.6811	3.31159	2.00931	2.83677	5.54923	1.46568	5.15715	4.4366	-30.142	26.9032	4.26027	4.78865	4.89595	3.41432	3.15002	2.16898	4.18525	0.970106	4.06677	2.06164	2.71929	79.7987	70.6978	75.2483	3.30954	7.8949	8.00021	7.69059	7.42591	7.30106	1.51735	8.05592	4.78865	5.21023	899.966	1011	951.553	729.298	724.517	2.03977	1.52844	2.54471	50.0146	4.02455
631	15.1478	20.8899	18.0188	0.448892	1.50662	15.1478	2.05926	1.17598	1.83677	3.88257	1.29902	2.79261	2.10326	-30.5965	28.9032	4.92694	5.12198	4.39595	4.72384	5.15002	3.33565	5.43525	2.63677	5.40011	3.06164	4.05262	83.8987	71.4645	77.6816	4.64287	7.22823	7.16688	7.19059	7.75924	7.63439	1.93833	8.38925	5.12198	4.98801	907.475	1020.36	979.153	715.985	730.897	1.45644	1.36177	1.54471	46.348	3.69122
632	16.065	22.0198	19.0424	0.450478	1.30766	16.065	1.52014	1.03511	1.70147	2.03088	1.12019	0.949447	2.27871	-30.496	29.5198	5.19207	5.20147	3.67409	3.67948	2.06664	2.80952	3.78597	1.00624	4.6211	2.09861	4.6697	83.1622	72.2267	77.6945	2.99734	6.8801	6.80713	6.85719	7.90736	7.96772	1.68464	8.36644	5.20147	4.73162	857.186	987.165	857.953	698.189	702.08	1.06541	0.993211	1.13498	48.2418	3.99652
67	16.0189	19.5232	17.771	0.394475	0.846147	16.0189	1.58581	1.13526	2.30002	1.32106	1.04815	2.47645	1.39125	-30.8235	34.1778	4.81584	5.78456	3.55682	3.29149	1.84028	2.0873	3.6733	1.01067	4.91293	1.151	3.66414	81.3954	69.9902	75.6928	2.90809	5.72227	5.70415	5.6414	2.48107	1.96772	-1.1959	NA	5.78456	5.19682	1124.42	1199.8	1265.25	863.638	985.494	0.952504	1.01955	0.879067	41.3971	2.86681
68	16.5189	22.7565	19.6377	0.434475	1.26948	16.5189	1.61684	1.24446	2.30002	1.65439	1.04815	1.94152	1.72459	-30.449	31.5111	4.48251	5.78456	3.72349	3.86292	2.50695	2.92063	4.08997	1.01067	5.41293	1.81766	4.49747	79.7288	70.0236	74.8762	3.24143	5.72227	5.37082	5.97473	5.03155	4.30106	-1.85853	6.2672	5.78456	5.41904	867.766	946.532	913.953	700.238	726.841	1.2025	1.01955	1.37907	46.0638	3.97793
69	16.0856	20.6565	18.371	0.424475	0.94948	16.0856	1.69786	1.24446	2.63335	1.65439	1.04815	2.5405	1.33608	-30.254	32.0143	4.48251	5.45123	3.39015	3.68368	1.84028	2.25396	4.1733	1.01067	5.57959	1.29809	4.42042	80.3954	70.0902	75.2428	3.30809	5.71058	5.70415	5.60998	4.39381	2.63439	-0.900084	9.2813	5.45123	4.76521	1092.65	1153.66	1265.25	845.878	923.566	0.961606	1.01955	0.910046	34.0638	2.7708
7	16.235	22.0004	19.1177	0.549488	1.3729	16.235	2.14307	1.71111	2.49508	3.09882	1.03264	2.93194	2.30954	-30.5725	30.6444	4.06515	6.22531	3.23698	3.64489	1.94306	2.60088	3.68881	1.01299	4.3992	3.05145	4.14578	79.9103	72.6519	76.2811	2.92097	6.46774	6.47142	6.35795	6.57636	6.96772	0.77355	6.72421	6.22531	4.01462	864.803	956.032	914.653	695.36	710.154	0.928661	0.9588	0.894772	50.5246	4.52285
70	15.9523	20.6565	18.3044	0.497809	0.806147	15.9523	1.77301	1.41113	2.30002	1.98773	1.04815	2.66763	1.39125	-30.6275	30.1778	4.48251	5.78456	3.72349	3.41054	1.84028	2.25396	3.83997	1.01067	5.07959	1.31766	3.66414	80.9288	71.6569	76.2928	3.04143	6.05561	6.20415	5.80806	4.53155	2.63439	-2.2803	6.93387	5.78456	4.19682	974.412	1025.6	1076.92	774.698	836.934	0.952504	1.01955	0.879067	46.7305	3.86681
71	16.7189	20.2898	18.5044	0.351142	1.07948	16.7189	1.9503	1.41113	2.30002	2.65439	1.04815	3.45683	1.40147	-30.514	34.2091	4.14917	4.78456	3.89015	3.44312	1.84028	2.42063	3.83997	1.01067	5.41293	1.41386	3.30394	81.8288	68.4569	75.1428	3.04143	6.38288	6.03748	6.63551	5.37424	4.30106	-2.26971	6.98117	4.78456	5.35252	832.541	903.432	869.753	664.229	709.536	1.30516	1.18622	1.4252	45.3971	4.63154
72	15.9856	20.3232	18.1544	0.191142	0.712814	15.9856	1.90454	1.41113	2.63335	1.98773	1.04815	2.78037	2.03033	-30.7925	30.4294	4.48251	5.1179	3.22349	3.24949	1.84028	2.0873	3.58997	1.01067	5.41293	0.974546	3.20895	82.0621	71.7569	76.9095	2.84143	5.13309	5.53748	4.62569	4.49397	2.63439	-1.42349	6.90706	5.1179	4.42546	1047.81	1118.13	1179.35	827.38	883.513	0.957055	1.01955	0.894557	44.0638	4.42992
73	15.4856	19.9232	17.7044	0.251142	0.692814	15.4856	1.37355	1.0778	2.30002	0.987727	1.04815	1.71549	1.35856	-30.821	27.747	4.14917	5.45123	3.05682	3.26891	1.84028	2.0873	3.33997	1.01067	5.57959	1.34311	3.30571	81.2954	74.5902	77.9428	2.64143	5.17779	5.37082	4.87863	3.34491	1.96772	-1.04927	7.08568	5.45123	4.7365	1136.98	1229.53	1300.45	879.773	955.157	0.947395	1.01955	0.871488	36.7305	2.992
77	15.0317	21.5198	18.2758	0.483812	1.49099	15.0317	1.56947	1.20178	1.36814	3.03088	0.953526	1.76663	1.87999	-29.976	25.325	4.52541	5.53481	3.67409	3.96765	3.73331	2.80952	4.53597	1.33957	5.28777	1.98284	3.61951	80.9289	73.5601	77.2445	3.66401	7.29113	6.9738	7.49833	6.15617	5.30106	0.244231	7.59886	5.53481	4.92209	962.236	1091.13	1068.89	732.228	774.313	1.22186	1.32654	1.11982	45.2418	2.46911
8	17.3016	22.2338	19.7677	0.542821	1.2729	17.3016	1.96454	1.54445	2.16174	2.43215	1.1993	2.99673	1.64798	-30.4415	27.3268	4.39848	6.22531	3.23698	3.26832	2.60973	2.10088	3.77215	1.34632	4.23253	1.68288	2.88235	81.1436	74.0185	77.5811	3.0543	6.33971	6.47142	6.105	6.2477	6.30106	0.114297	6.74786	6.22531	4.03692	865.438	956.032	909.587	699.923	713.34	0.938321	0.9588	0.917841	46.1913	4.62743
81	15.6984	22.8198	19.2591	0.460478	1.61766	15.6984	2.55464	1.53511	2.03481	4.03088	1.28686	3.48639	4.2685	-29.942	32.8217	3.85874	5.20147	3.84075	3.93261	3.39997	2.47618	3.8693	1.00624	5.78777	2.16907	4.69656	82.8289	72.3601	77.5945	3.06401	6.55283	6.30713	6.69641	6.73134	6.30106	1.21887	7.65248	5.20147	4.90926	960.063	1050.3	1045.09	769.911	791.315	1.0461	0.993211	1.08884	45.5752	3.3429
82	16.6984	22.1865	19.4424	0.447145	1.30433	16.6984	2.69795	1.36844	2.70147	4.03088	1.45353	3.98245	3.90758	-30.496	31.4067	3.85874	4.20147	4.00742	2.81918	2.06664	1.97618	2.70264	1.00624	4.45444	1.65929	2.24137	81.1956	74.8267	78.0112	2.13068	5.96365	6.14046	5.6807	7.19375	6.63439	2.06834	8.29233	4.20147	4.80456	1004.28	1115.33	1115.62	768.456	834.697	1.05065	0.993211	1.10433	45.5752	3.46156
83	15.365	21.3531	18.3591	0.433812	1.41766	15.365	1.66684	1.03511	1.70147	2.69755	1.12019	1.67809	2.60694	-30.119	23.5041	4.52541	5.86814	3.34075	4.10366	3.06664	2.47618	4.28597	2.33957	6.1211	1.96717	4.43313	81.4289	72.6934	77.0612	3.66401	6.75813	6.80713	6.61013	7.23602	6.63439	1.5824	8.34279	5.86814	4.59822	962.65	1066.93	1063.99	739.302	796.881	1.05575	0.993211	1.11191	41.2418	3.33638
84	16.5317	24.2198	20.3758	0.623812	1.71766	16.5317	2.84167	1.20178	1.36814	5.03088	1.12019	4.82205	5.24602	-30.263	27.7557	3.85874	4.86814	3.00742	3.01404	2.06664	1.64285	3.53597	1.00624	4.78777	1.62406	1.97794	80.6622	72.6934	76.6778	2.79734	6.50228	6.30713	6.59443	8.03176	7.96772	2.43014	8.64932	4.86814	4.38241	921.05	1042.73	992.753	720.8	745.047	1.22697	0.993211	1.46073	46.2418	2.45503
85	16.2317	21.8865	19.0591	0.490478	1.37099	16.2317	2.37957	1.36844	3.36814	4.03088	1.45353	2.61911	2.91268	-30.1865	33.089	4.19207	4.86814	2.50742	2.99023	1.73331	1.80952	3.28597	1.00624	4.6211	1.95739	2.14461	79.9956	72.5267	76.2612	2.59734	6.58562	6.4738	6.59443	7.03176	6.96772	2.09506	7.64932	4.86814	4.82686	978.012	1115.33	1081.82	759.54	772.487	1.39364	1.15988	1.6274	42.2418	2.45503
86	17.865	23.3531	20.6091	0.550478	1.34433	17.865	1.77205	1.20178	1.70147	3.03088	1.28686	2.28429	1.27361	-30.3655	25.5041	4.52541	5.20147	3.34075	3.79414	2.73331	2.64285	4.20264	2.00624	5.95444	1.80051	2.93313	82.1289	74.2934	78.2112	3.53068	6.1748	6.4738	5.7768	7.40268	7.30106	1.27991	8.00946	5.20147	4.15377	879.626	1017.03	922.587	709.252	686.134	1.22242	0.993211	1.44524	46.9085	3.78082
87	16.4984	22.3531	19.4258	0.410478	1.27766	16.4984	2.33838	1.20178	3.03481	4.69755	1.28686	2.41188	2.94027	-30.373	31.1707	4.19207	5.20147	3.67409	3.1989	2.06664	1.97618	3.70264	1.00624	4.95444	1.80051	2.26647	82.2622	74.0601	78.1612	2.93068	5.9248	6.14046	5.61013	7.56935	7.30106	2.20838	8.34279	5.20147	4.26488	959.165	1083.06	1059.09	725.932	785.077	1.13909	1.15988	1.11191	45.9085	2.89193
88	15.9317	23.7531	19.8424	0.560478	1.46766	15.9317	2.76823	1.36844	2.70147	5.36422	1.45353	3.94794	3.61716	-30.3685	31.2021	3.85874	5.20147	3.17409	3.04101	1.73331	1.97618	3.03597	1.00624	5.28777	1.56337	2.57294	80.3289	71.5601	75.9445	2.39734	6.25208	5.9738	6.43758	7.41203	6.96772	2.06687	8.39009	5.20147	4.30947	975.598	1107.26	1068.89	756.995	786.029	1.07507	0.993211	1.15805	47.9085	3.32332
9	16.2016	21.9671	19.0844	0.466154	1.3529	16.2016	1.86643	1.21111	2.82841	2.09882	1.03264	2.54945	2.28195	-30.8995	27.5627	4.73182	5.89198	4.73698	3.24574	1.60973	2.10088	3.60548	1.01299	4.73253	1.70833	3.19059	82.5103	72.9519	77.7311	2.8543	6.87856	6.80475	6.84224	4.70544	2.96772	-1.57576	7.03073	5.89198	4.46548	1006.21	1054.63	1152.09	788.888	846.86	0.933212	0.9588	0.910262	41.5246	3.97484
90	15.3317	21.5531	18.4424	0.437145	1.27433	15.3317	3.40166	1.53511	6.70147	6.36422	1.95353	3.31578	3.90758	-29.968	34.4067	3.85874	5.20147	3.67409	3.10489	2.39997	2.30952	3.28597	1.00624	5.1211	1.49262	2.0747	79.4289	75.5601	77.4945	2.59734	6.38031	6.30713	6.34737	7.19375	7.63439	2.38319	7.29233	5.20147	4.24901	945.584	1042.73	1027.95	741.036	787.604	1.63398	1.15988	2.10433	48.5752	4.46156
92	17.1317	24.4198	20.7758	0.447145	1.63766	17.1317	1.91719	1.36844	1.70147	3.03088	0.953526	2.58334	2.58446	-30.2435	23.7714	4.52541	5.20147	3.34075	2.87557	1.39997	1.80952	2.70264	1.00624	5.1211	1.58882	2.54784	80.1289	72.2934	76.2112	2.13068	6.70759	6.80713	6.50815	7.36977	7.63439	1.46492	7.67296	5.20147	4.18249	866.919	1017.03	882.753	691.937	693.226	1.06996	0.993211	1.15047	48.2418	3.78184
93	16.4856	21.1898	18.8377	0.347809	1.20281	16.4856	1.85732	1.41113	1.30002	1.98773	1.04815	3.11718	2.30338	-30.27	26.5836	5.81584	4.45123	3.55682	3.28015	1.17362	2.5873	3.83997	1.01067	4.24626	1.32354	3.56199	79.8621	68.9569	74.4095	3.04143	6.74942	6.70415	6.68055	6.74746	6.63439	0.271786	7.49645	4.45123	4.30489	850.374	955.698	869.753	681.597	712.693	1.53983	1.18622	1.90247	46.0638	4.56265
94	16.3189	21.6232	18.971	0.277809	1.19615	16.3189	2.21591	1.41113	2.30002	2.98773	1.21482	3.39949	2.697	-30.722	27.7627	5.14917	5.45123	4.55682	3.20187	1.17362	2.25396	3.58997	1.01067	4.91293	1.47455	3.04228	80.4288	69.8236	75.1262	2.84143	6.54976	6.87082	6.12569	7.49397	7.30106	0.9403	8.24039	5.45123	4.20324	850.532	939.432	901.653	680.08	698.093	1.37372	1.01955	1.72789	46.3971	4.76325
95	17.2856	21.6565	19.471	0.257809	0.996147	17.2856	1.59578	1.41113	1.96668	0.987727	1.04815	2.38215	1.69189	-31.1215	30.4137	5.81584	5.1179	3.89015	3.26891	1.84028	2.25396	3.6733	1.01067	4.57959	1.34311	3.47238	80.7288	69.6236	75.1762	2.90809	7.09445	7.20415	6.87863	6.65596	6.63439	0.642978	7.21674	5.1179	4.51428	882.173	988.232	939.253	698.606	719.587	0.947395	1.01955	0.871488	49.7305	4.54756
96	15.7523	21.9898	18.871	0.281142	1.16948	15.7523	1.57343	1.24446	1.96668	1.65439	1.04815	2.29344	1.33608	-30.7095	25.3477	5.48251	5.78456	3.39015	4.06463	2.50695	3.25396	4.50663	1.01067	5.41293	1.79809	4.75375	81.5621	70.5569	76.0595	3.57476	6.71058	6.87082	6.44332	4.95638	2.63439	-1.62626	7.88025	5.78456	5.20966	1030.44	1118.13	1176.99	788.078	850.781	1.04494	1.01955	1.07671	39.7305	2.65969
97	16.1856	21.6232	18.9044	0.374475	1.18281	16.1856	2.01992	1.24446	2.63335	2.98773	1.04815	2.98037	2.03033	-30.4655	28.7627	5.48251	5.1179	3.72349	3.60663	1.84028	2.42063	3.83997	1.01067	5.24626	1.80788	4.20895	80.1288	69.3902	74.7595	3.04143	7.21642	7.70415	6.62569	7.8273	7.63439	0.749812	8.57372	5.1179	4.09213	805.658	886.732	832.12	652.193	668.717	1.79039	1.01955	2.56122	52.3971	5.31881
98	17.2856	20.1898	18.7377	0.407809	1.10281	17.2856	1.88366	1.41113	2.30002	1.98773	1.04815	2.90272	2.03033	-30.939	25.0961	5.48251	6.1179	3.39015	3.13044	1.50695	2.25396	3.83997	1.01067	4.41293	0.974546	2.87561	79.0954	73.3236	76.2095	3.04143	7.38309	7.70415	6.95902	7.8273	7.30106	-0.114931	8.90706	6.1179	3.98102	760.134	817.332	773.62	640.03	626.683	2.37372	1.35289	3.39456	53.3971	5.20769
99	16.9523	22.6232	19.7877	0.597809	1.13615	16.9523	1.78915	1.41113	1.96668	2.32106	1.04815	2.58037	1.697	-30.6815	27.7627	5.14917	5.45123	4.22349	2.96377	1.50695	1.75396	3.1733	1.01067	4.91293	0.974546	3.04228	79.1954	69.3902	74.2928	2.50809	6.71642	6.53748	6.79236	7.3273	6.96772	0.623513	8.24039	5.45123	4.20324	851.949	939.432	901.653	681.317	702.527	1.29039	1.01955	1.56122	40.7305	4.65214
563	17.665	23.5198	20.5924	0.647145	1.49433	17.665	1.87163	1.53511	1.36814	2.87033	1.06869	1.9015	1.94538	NA	22.1864	4.54814	5.28609	3.47026	3.58301	1.39997	1.47618	3.89128	1.32753	5.10299	2.59861	4.00304	80.5956	70.8601	75.7278	3.14585	6.44516	6.53816	6.19052	8.02755	7.96772	2.12546	7.69978	5.28609	3.88775	894.95	1021	941.664	715.389	737.787	1.24424	1.00495	1.63498	51.055	4.3882
564	16.565	23.6865	20.1258	0.520478	1.43766	16.565	1.7181	1.53511	1.70147	2.03088	0.953526	2.41911	1.57935	-30.7133	23.089	4.69207	5.20147	4.03305	2.60352	2.06664	1.80952	2.07764	1.00624	4.6211	1.62406	2.64461	80.8622	72.7267	76.7945	1.67911	6.35071	6.12284	7.09443	7.44926	7.21146	1.60055	7.64932	5.20147	3.50959	914.769	1032.09	981.396	734.06	726.1	1.53647	1.15988	2.1274	50.2575	4.35342
565	17.565	22.6531	20.1091	0.573812	1.19099	17.565	2.50771	1.36844	2.70147	3.62339	1.37627	3.68103	3.60694	-31.2253	22.8374	4.39284	4.49506	4.04685	2.82723	1.06664	1.64285	2.98561	0.988173	4.34394	1.63384	2.5998	81.2956	74.8934	78.0945	2.33616	6.52691	6.74276	5.94347	6.80139	6.43369	1.13572	7.34279	4.49506	4.04246	941.578	1036.32	1034.82	735.955	765.081	1.21184	1.09416	1.27858	52.1818	4.44837
566	16.365	24.1531	20.2591	0.460478	1.69433	16.365	1.7163	1.20178	2.70147	3.03088	0.953526	1.32777	1.91779	NA	23.1047	4.19207	6.20147	4.67409	3.04224	1.39997	2.14285	3.20264	1.00624	4.45444	2.08882	2.54784	81.8289	71.1934	76.5112	2.53068	5.54092	5.64046	5.34148	6.03644	5.30106	0.988866	7.33963	6.20147	4.2936	1026.03	1115.33	1130.09	824.19	851.769	1.06996	0.993211	1.15047	46.2418	3.22628
568	17.7016	22.1338	19.9177	0.576154	0.982901	17.7016	1.76196	1.04445	2.16174	1.76549	1.03264	3.23934	1.68067	NA	30.7575	3.73182	4.89198	4.23698	2.69566	0.943059	1.43421	2.60548	1.01299	4.8992	1.3241	2.57411	81.3103	75.8185	78.5644	2.0543	5.96754	5.63808	6.2011	6.12329	4.63439	0.363292	8.13165	4.89198	4.27502	1029.55	1112.36	1133.29	836.545	852.633	0.943429	0.9588	0.92542	43.5246	3.83558
569	15.5478	23.6899	19.6188	0.565559	2.02996	15.5478	2.14068	1.84264	2.50343	4.54923	1.29902	0.791103	2.10837	NA	30.9189	4.26027	5.78865	3.89595	3.63126	2.15002	2.88945	4.10192	1.63677	4.73344	2.35974	2.95586	80.1987	69.6312	74.915	3.37621	4.76687	5.16688	4.27098	7.59725	8.30106	1.60736	7.4129	5.78865	5.34364	822.01	880.598	860.053	661.385	702.647	1.04943	1.02844	1.06778	54.6813	4.68469
570	16.6189	21.7898	19.2044	0.411142	1.47281	16.6189	1.40822	1.0778	2.30002	1.32106	1.04815	1.59949	1.36366	NA	31.0961	3.81584	5.78456	4.22349	3.22568	1.84028	2.25396	3.50663	1.01067	5.07959	1.14121	3.20895	81.6288	69.6236	75.6262	2.77476	5.21642	5.53748	4.79236	2.10345	1.5891	-0.245873	NA	5.78456	5.09213	1238.24	1292.22	1457.75	947.503	1060.27	0.957055	1.01955	0.894557	35.3763	3.31881
571	17.5683	21.3338	19.451	0.532821	0.989568	17.5683	1.87823	1.21111	2.16174	2.43215	1.03264	3.11306	1.67557	NA	29.7418	4.06515	5.89198	3.57031	2.92937	1.60973	2.10088	3.10548	1.34632	4.3992	1.19266	2.67088	80.4769	74.5185	77.4977	2.52097	6.09556	5.97142	6.12071	6.45195	5.96772	1.01921	7.44133	5.89198	3.47494	971.515	1055.83	1076.92	778.375	791.434	1.10044	1.29213	0.902352	44.858	4.06433
572	14.7811	23.2566	19.0188	0.528892	2.31329	14.7811	1.00226	1.00931	1.1701	1.88257	0.965683	0.54864	0.436596	NA	24.9032	5.5936	5.78865	3.72928	5.1286	3.81668	4.66898	4.68525	2.30344	6.56677	3.2283	6.55262	75.7654	68.2312	71.9983	3.97621	7.1449	7.66688	6.52392	8.48107	7.96772	0.314152	NA	5.78865	4.32134	739.781	786.265	747.953	653.745	587.661	1.70644	1.36177	2.04471	46.0146	5.58011
573	14.9984	21.1531	18.0758	0.340478	1.30766	14.9984	1.44077	1.20178	1.03481	2.03088	0.953526	1.96397	1.54665	NA	29.9916	5.52541	4.20147	3.67409	2.84861	1.39997	2.30952	2.95264	1.00624	4.45444	1.48284	2.11951	82.4956	71.4267	76.9612	2.33068	6.87446	6.9738	6.665	5.15617	5.63439	0.293022	5.26552	4.20147	4.25543	937.86	1051.03	1013.25	735.905	768.867	1.0552	0.993211	1.11982	47.9085	4.13577
574	15.8317	23.0865	19.4591	0.310478	1.38766	15.8317	1.71761	1.53511	1.70147	2.03088	0.953526	2.59996	1.54665	NA	25.9916	4.19207	5.20147	4.00742	3.03908	1.73331	1.97618	3.70264	1.00624	3.95444	1.81617	2.28618	81.3956	73.3934	77.3945	2.93068	6.37446	6.30713	6.33167	6.65617	6.63439	1.40582	7.26552	5.20147	4.25543	947.523	1042.73	990.853	763.655	810.47	1.0552	0.993211	1.11982	49.5752	4.58022
575	16.8856	20.8565	18.871	0.474475	1.22281	16.8856	1.56174	1.24446	2.30002	1.20994	1.12373	1.91649	1.72969	-30.8217	27.5268	5.27383	4.83827	3.68613	2.75611	0.840283	1.5873	2.80606	1.01183	4.4894	0.78243	2.73404	79.3621	71.8569	75.6095	2.20988	6.35443	6.75439	5.22178	4.78483	3.65591	-0.836253	7.62418	4.83827	4.4553	1010.61	1080.61	1118.04	813.032	857.86	1.01512	0.989177	0.902136	43.4035	4.25168
576	17.2189	20.9565	19.0877	0.427809	0.966147	17.2189	1.42325	1.11303	1.96668	1.32106	1.21482	1.833	1.33097	NA	30.6653	4.48251	5.1179	4.22349	2.84596	1.50695	1.75396	3.08997	1.01067	4.57959	0.833328	2.85052	80.7288	71.0236	75.8762	2.44143	5.0886	5.37082	4.69626	NA	NA	NA	NA	5.1179	5.07625	1224.96	1277.93	1472.45	935.625	1031.45	0.951946	1.01955	0.886978	NA	2.77732
577	16.435	23.0671	19.751	0.339488	1.5229	16.435	1.90566	1.04445	3.49508	3.09882	1.03264	2.25571	1.67557	NA	28.0752	4.39848	5.55865	3.23698	2.83413	1.27639	1.60088	3.18881	1.01299	4.23253	1.19266	2.83755	82.7103	73.2519	77.9811	2.52097	5.4289	5.80475	4.95404	6.11862	5.96772	0.994758	6.77467	5.55865	4.14161	969.42	1029.06	1044.52	787.448	833.147	0.93377	0.9588	0.902352	45.858	3.61989
920	NA	NA	NA	NA	NA	NA	NA	NA	NA	NA	NA	NA	NA	NA	NA	NA	NA	NA	NA	NA	NA	NA	NA	NA	NA	NA	NA	NA	NA	NA	NA	NA	NA	NA	NA	NA	NA	NA	NA	NA	NA	NA	NA	NA	NA	NA	NA	NA	NA
921	NA	NA	NA	NA	NA	NA	NA	NA	NA	NA	NA	NA	NA	NA	NA	NA	NA	NA	NA	NA	NA	NA	NA	NA	NA	NA	NA	NA	NA	NA	NA	NA	NA	NA	NA	NA	NA	NA	NA	NA	NA	NA	NA	NA	NA	NA	NA	NA	NA
922	16.6078	23.1676	19.8877	0.254475	1.14948	16.6078	1.94028	1.20615	2.41113	NA	NA	NA	NA	NA	NA	NA	NA	NA	2.99571	1.17362	2.0873	NA	NA	NA	NA	NA	81.8177	71.0791	76.4484	NA	NA	NA	NA	NA	NA	NA	NA	NA	5.08204	NA	NA	NA	NA	NA	NA	NA	NA	NA	2.6512
923	17.0634	21.2009	19.1322	0.415586	1.00726	17.0634	2.07606	1.13335	2.96668	NA	NA	NA	NA	NA	NA	NA	NA	NA	3.18089	1.61806	2.14285	NA	NA	NA	NA	NA	81.451	71.6791	76.5651	NA	NA	NA	NA	NA	NA	NA	NA	NA	4.52649	NA	NA	NA	NA	NA	NA	NA	NA	NA	3.42898
924	17.43	21.312	19.371	0.450031	1.01281	17.43	1.8168	1.13335	2.18891	NA	NA	NA	NA	NA	NA	NA	NA	NA	2.81052	1.39584	1.69841	NA	NA	NA	NA	NA	79.5065	71.3569	75.4317	NA	NA	NA	NA	NA	NA	NA	NA	NA	4.52649	NA	NA	NA	NA	NA	NA	NA	NA	NA	2.54009
925	15.935	19.2671	17.601	0.462821	0.839568	15.935	1.74848	1.04445	2.16174	NA	NA	NA	NA	NA	NA	NA	NA	NA	2.8168	1.27639	1.76754	NA	NA	NA	NA	NA	79.2103	75.0852	77.1477	NA	NA	NA	NA	NA	NA	NA	NA	NA	4.16932	NA	NA	NA	NA	NA	NA	NA	NA	NA	5.76602
926	17.335	21.9671	19.651	0.462821	1.11623	17.335	1.74848	1.04445	2.16174	NA	NA	NA	NA	NA	NA	NA	NA	NA	2.70569	1.27639	1.60088	NA	NA	NA	NA	NA	81.7436	74.8185	78.2811	NA	NA	NA	NA	NA	NA	NA	NA	NA	5.16932	NA	NA	NA	NA	NA	NA	NA	NA	NA	5.09935
927	18.335	23.1671	20.751	0.766154	1.3129	18.335	2.08181	1.21111	2.82841	NA	NA	NA	NA	NA	NA	NA	NA	NA	2.92791	1.60973	1.76754	NA	NA	NA	NA	NA	80.3436	75.1852	77.7644	NA	NA	NA	NA	NA	NA	NA	NA	NA	3.50265	NA	NA	NA	NA	NA	NA	NA	NA	NA	5.09935
928	14.9317	21.3365	18.1341	0.247145	1.17266	14.9317	1.64439	1.45178	1.03481	NA	NA	NA	NA	NA	NA	NA	NA	NA	3.21931	1.23331	2.39285	NA	NA	NA	NA	NA	79.4789	73.6934	76.5862	NA	NA	NA	NA	NA	NA	NA	NA	NA	6.96836	NA	NA	NA	NA	NA	NA	NA	NA	NA	7.23268
929	17.665	21.8698	19.7674	0.653812	1.31599	17.665	2.36661	1.28511	3.53481	NA	NA	NA	NA	NA	NA	NA	NA	NA	3.21931	1.73331	2.14285	NA	NA	NA	NA	NA	81.0456	71.9601	76.5028	NA	NA	NA	NA	NA	NA	NA	NA	NA	4.3017	NA	NA	NA	NA	NA	NA	NA	NA	NA	4.89935
930	16.1984	21.9865	19.0924	0.413812	1.32099	16.1984	1.53327	1.03511	1.53481	NA	NA	NA	NA	NA	NA	NA	NA	NA	2.88597	1.56664	1.72618	NA	NA	NA	NA	NA	81.6122	73.2601	77.4362	NA	NA	NA	NA	NA	NA	NA	NA	NA	3.96836	NA	NA	NA	NA	NA	NA	NA	NA	NA	3.39935
931	17.7817	22.7198	20.2508	0.530478	1.56433	17.7817	1.69994	1.28511	1.53481	NA	NA	NA	NA	NA	NA	NA	NA	NA	3.05264	1.73331	1.89285	NA	NA	NA	NA	NA	78.9456	71.0767	75.0112	NA	NA	NA	NA	NA	NA	NA	NA	NA	3.96836	NA	NA	NA	NA	NA	NA	NA	NA	NA	5.73268
932	16.415	22.6698	19.5424	0.445478	1.32266	16.415	1.97772	1.36844	2.20147	NA	NA	NA	NA	NA	NA	NA	NA	NA	3.1082	2.06664	1.80952	NA	NA	NA	NA	NA	80.3622	73.2101	76.7862	NA	NA	NA	NA	NA	NA	NA	NA	NA	6.3017	NA	NA	NA	NA	NA	NA	NA	NA	NA	4.73268
933	16.6478	22.0566	19.3522	0.612226	1.47662	16.6478	1.50562	1.00931	1.50343	NA	NA	NA	NA	NA	NA	NA	NA	NA	3.48674	2.48335	2.16898	NA	NA	NA	NA	NA	81.2321	69.6312	75.4316	NA	NA	NA	NA	NA	NA	NA	NA	NA	6.13475	NA	NA	NA	NA	NA	NA	NA	NA	NA	4.49441
934	NA	NA	NA	NA	NA	NA	NA	NA	NA	NA	NA	NA	NA	NA	NA	NA	NA	NA	NA	NA	NA	NA	NA	NA	NA	NA	NA	NA	NA	NA	NA	NA	NA	NA	NA	NA	NA	NA	NA	NA	NA	NA	NA	NA	NA	NA	NA	NA	NA
935	NA	NA	NA	NA	NA	NA	NA	NA	NA	NA	NA	NA	NA	NA	NA	NA	NA	NA	NA	NA	NA	NA	NA	NA	NA	NA	NA	NA	NA	NA	NA	NA	NA	NA	NA	NA	NA	NA	NA	NA	NA	NA	NA	NA	NA	NA	NA	NA	NA
936	NA	NA	NA	NA	NA	NA	NA	NA	NA	NA	NA	NA	NA	NA	NA	NA	NA	NA	NA	NA	NA	NA	NA	NA	NA	NA	NA	NA	NA	NA	NA	NA	NA	NA	NA	NA	NA	NA	NA	NA	NA	NA	NA	NA	NA	NA	NA	NA	NA
940	NA	NA	NA	NA	NA	NA	2.05369	NA	NA	NA	NA	NA	NA	-30.7203	NA	NA	NA	3.55869	3.34757	NA	NA	NA	NA	NA	NA	NA	NA	NA	NA	2.16341	6.31793	6.42094	NA	8.58579	8.03228	1.58892	NA	NA	3.12059	843.456	971.368	898.413	NA	NA	NA	NA	NA	NA	4.34164
941	NA	NA	NA	NA	NA	NA	1.97036	NA	NA	NA	NA	NA	NA	-30.737	NA	NA	NA	3.55869	2.6809	NA	NA	NA	NA	NA	NA	NA	NA	NA	NA	2.16341	6.65126	6.75427	NA	8.58579	8.03228	2.12978	NA	NA	2.78725	889.789	1020.5	941.947	NA	NA	NA	NA	NA	NA	3.34164
942	NA	NA	NA	NA	NA	NA	2.88702	NA	NA	NA	NA	NA	NA	-30.2217	NA	NA	NA	2.55869	2.56979	NA	NA	NA	NA	NA	NA	NA	NA	NA	NA	2.16341	7.4846	7.58761	NA	8.58579	8.03228	0.999041	NA	NA	3.78725	792.923	915.968	852.747	NA	NA	NA	NA	NA	NA	3.34164
943	NA	NA	NA	NA	NA	NA	2.63702	NA	NA	NA	NA	NA	NA	-30.5743	NA	NA	NA	4.30869	2.79201	NA	NA	NA	NA	NA	NA	NA	NA	NA	NA	2.16341	5.81793	5.92094	NA	5.91912	5.36561	0.142291	NA	NA	3.12059	947.973	1045.07	1033.75	NA	NA	NA	NA	NA	NA	3.67497
[truncated: 96 more columns]
